# Supplementary material for: Revisiting the assignment of innocent and non-innocent counterions in lanthanide( iii ) solution chemistry
Source: Royal Society of Chemistry journal article supplement (doi:10.1039/d2dt00565d), 2022-01-01
Supplement: d2dt00565d1.pdf [file d2dt00565d1.pdf]

# Supporting Information for: Revisiting the assignment of Innocent and Non-Innocent Counter ions in Lanthanide(III) Solution Chemistry:

Nicolaj Kofod, Maria Storm Thomsen, Patrick Nawrocki & Thomas Just Sørensen

*Nano-Science Center & Department of Chemistry, University of Copenhagen, Universitetsparken 5, 2100  
København Ø, Denmark*

## Contents

|                                                            |     |
|------------------------------------------------------------|-----|
| <b>Eu<sup>3+</sup> : EDTA</b> .....                        | S2  |
| <b>Eu<sup>3+</sup> : AcO<sup>-</sup></b> .....             | S11 |
| <b>Eu<sup>3+</sup> : NO<sub>3</sub><sup>-</sup></b> .....  | S19 |
| <b>Eu<sup>3+</sup> : HSO<sub>4</sub><sup>-</sup></b> ..... | S27 |
| <b>Eu<sup>3+</sup> : SO<sub>4</sub><sup>2-</sup></b> ..... | S35 |
| <b>Eu<sup>3+</sup> : Cl<sup>-</sup></b> .....              | S43 |
| <b>Eu<sup>3+</sup> : ClO<sub>4</sub><sup>-</sup></b> ..... | S51 |
| <b>Eu<sup>3+</sup> : OTf</b> .....                         | S59 |
| <b>System Screening</b> .....                              | S67 |
| <b>pH and Conductivity</b> .....                           | S78 |

## Eu<sup>3+</sup> : EDTA

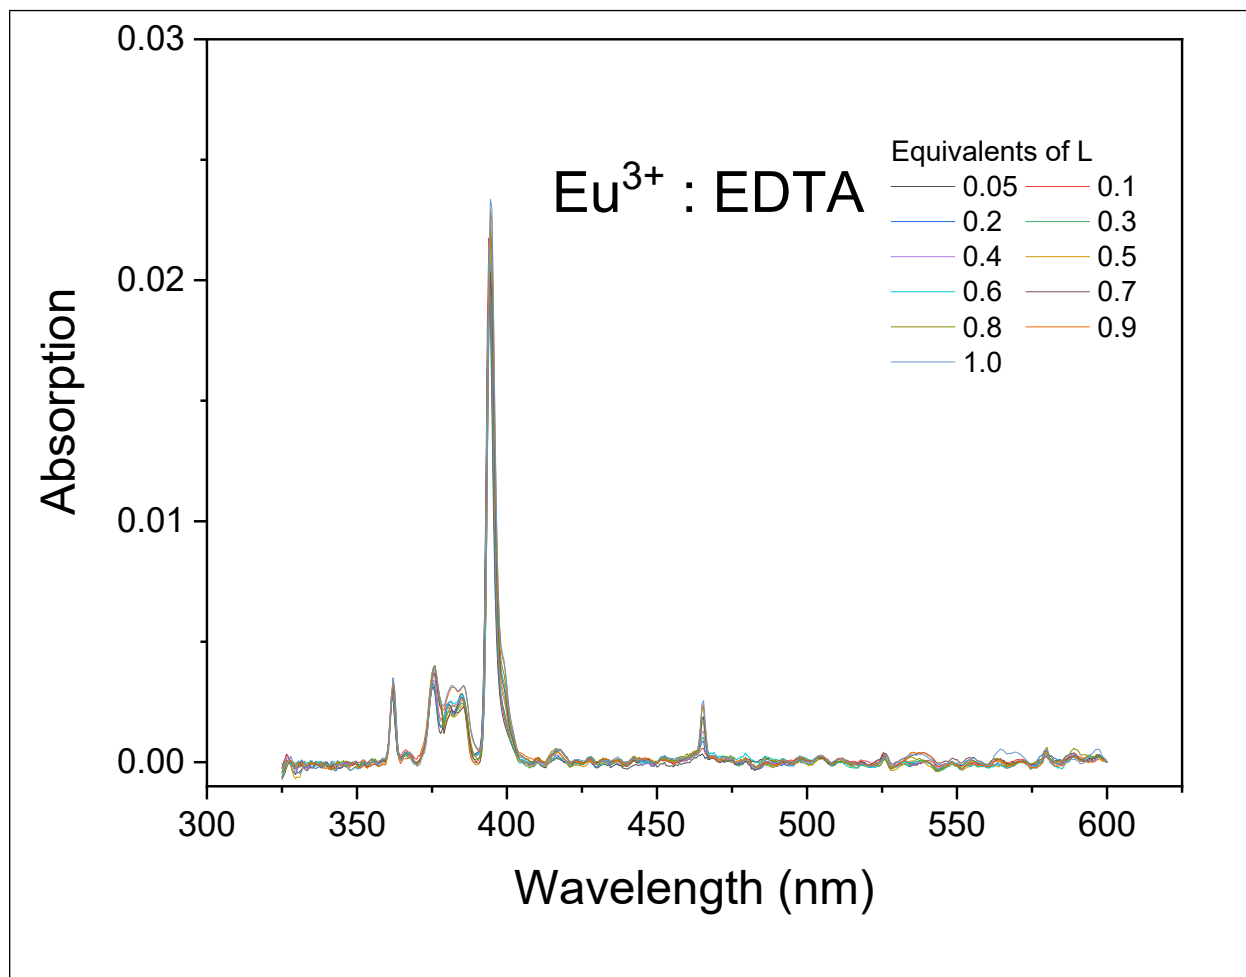

Figure S1. Absorption of Eu<sup>3+</sup> in NaCl-MES buffer with various equivalents of EDTA.



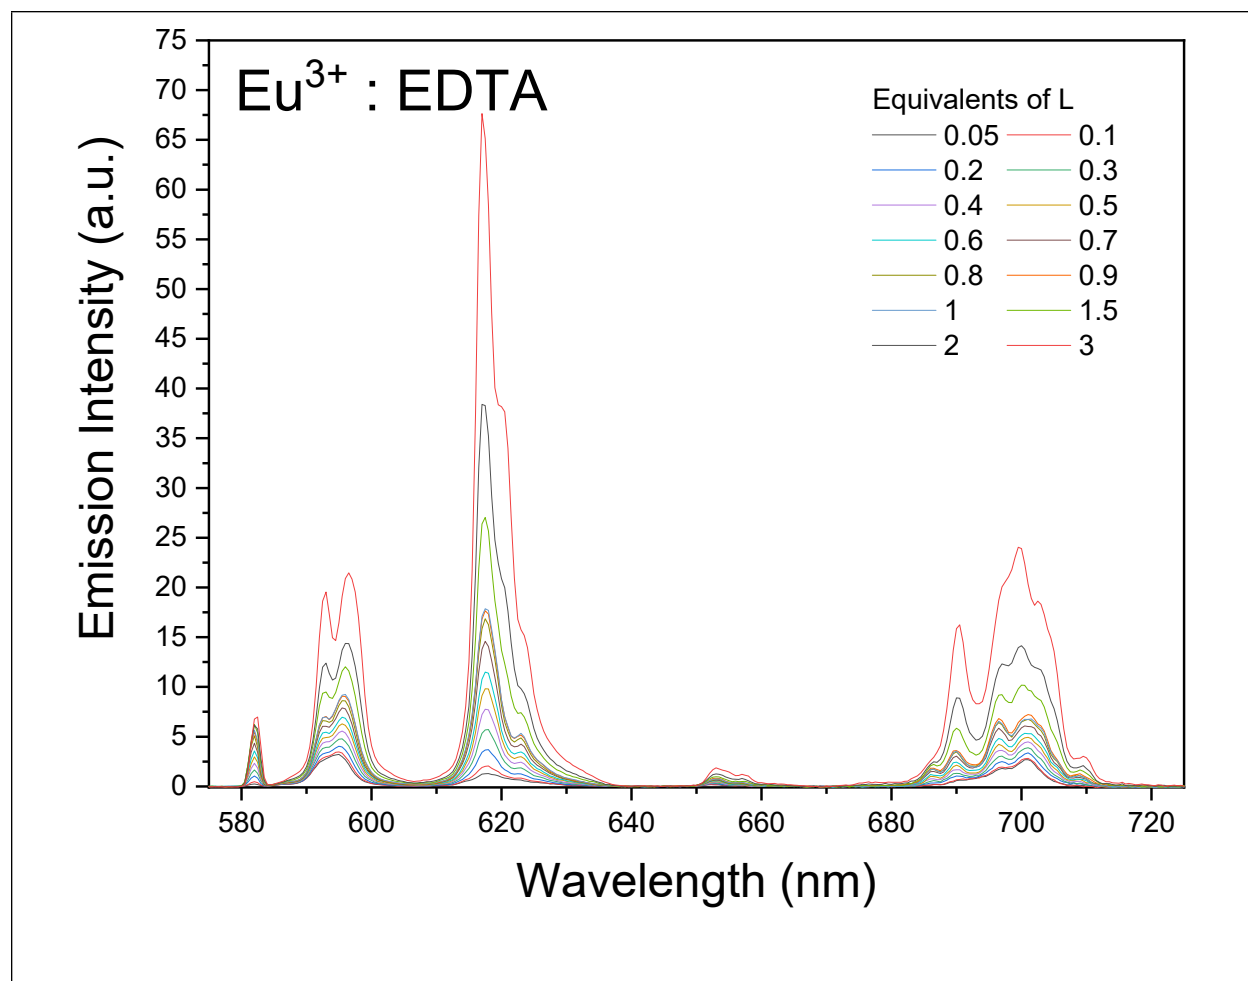

Figure S3. Emission spectrum of Eu<sup>3+</sup> in NaCl-MES buffer with various equivalents of EDTA.

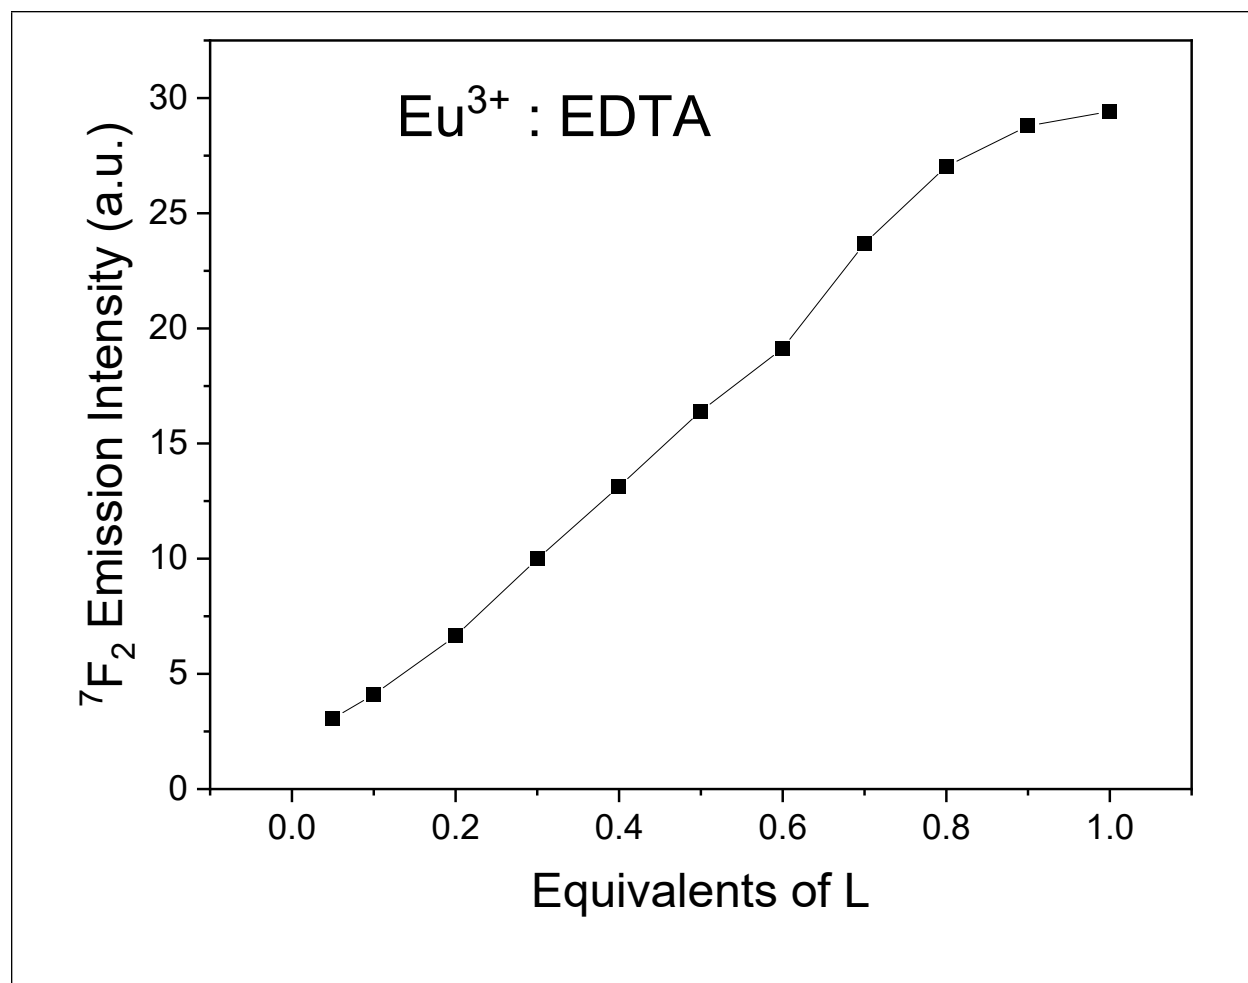

**Figure S4.** Emission intensity of the  ${}^5\text{D}_0 \rightarrow {}^7\text{F}_2$  emission band of  $\text{Eu}^{3+}$  in NaCl-MES buffer as a function of equivalents of EDTA. The emission intensity was taken as the integration over the full  ${}^7\text{F}_2$  band (606-637 nm).

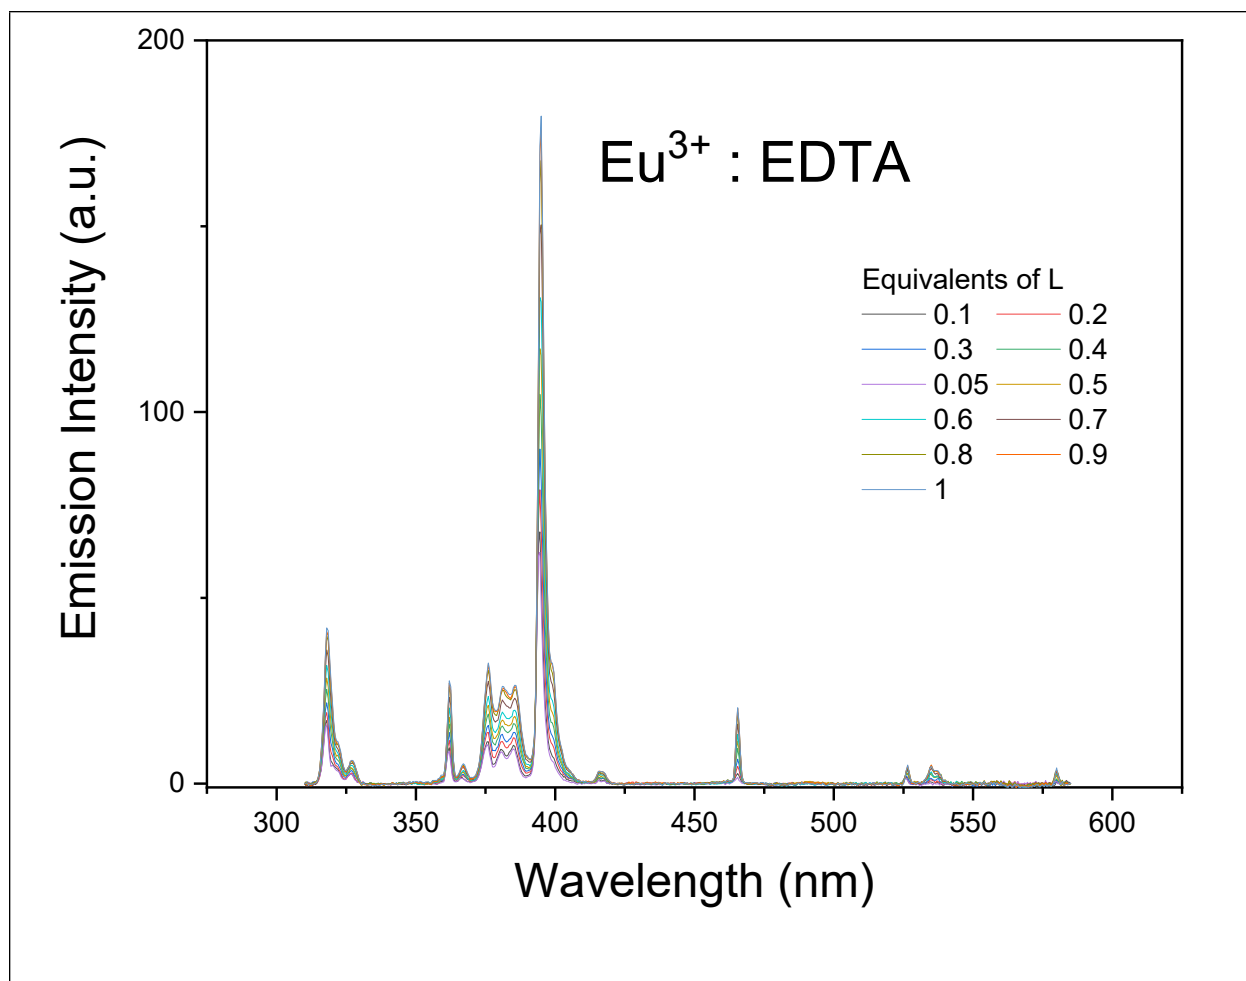

Figure S5. Excitation spectra of Eu<sup>3+</sup> in NaCl-MES buffer with various equivalents of EDTA

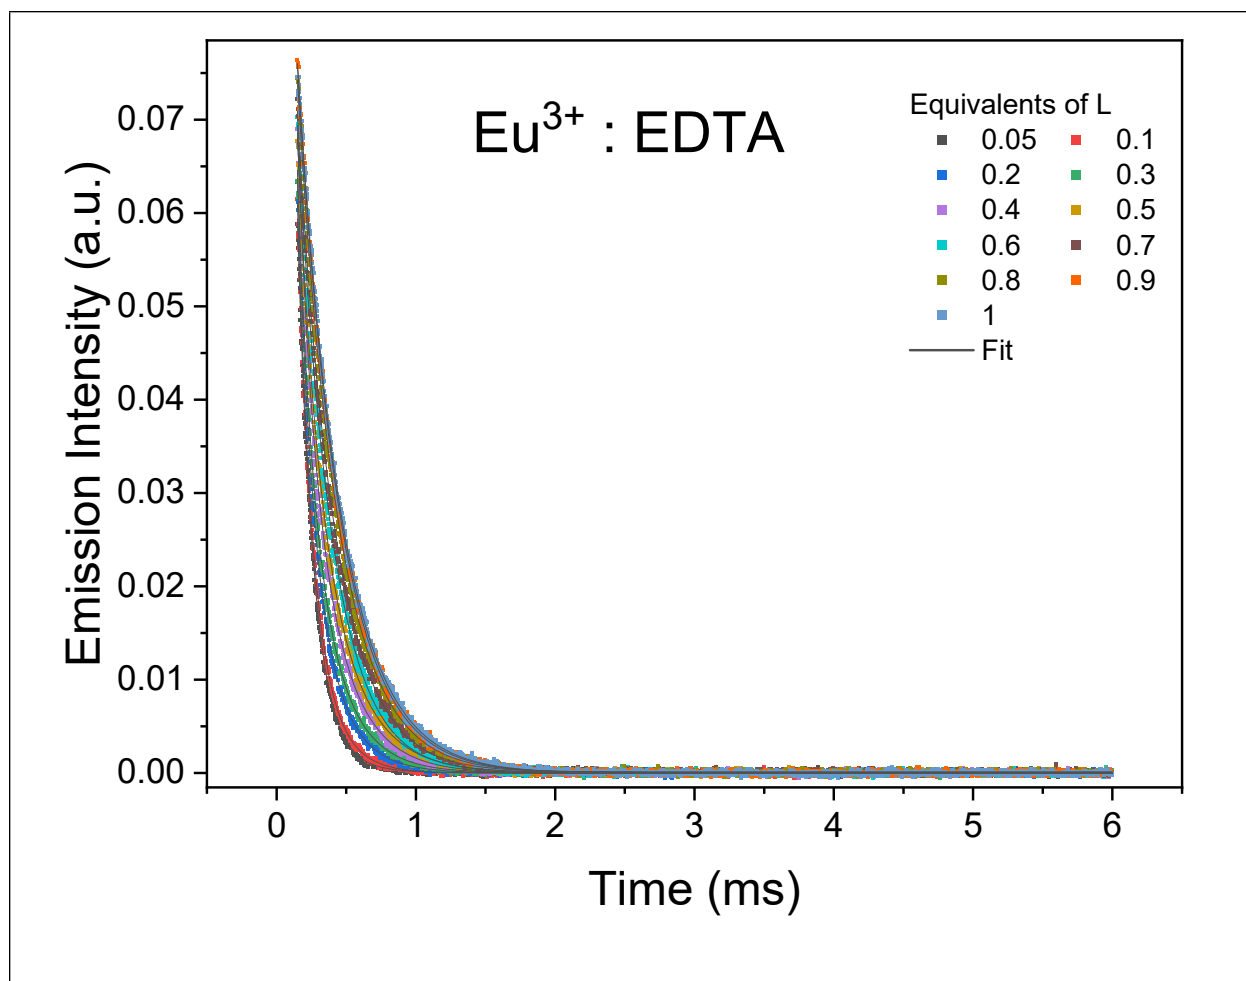

**Figure S6.** Time-resolved emission decay trace of  $\text{Eu}^{3+}$  in NaCl-MES buffer with various equivalents of EDTA. The decay traces has been fit with a bi-exponential (0.05-0.5 eq.) or mono-exponential (0.5-1 eq.) decay function.

**Table S1.** Fitting parameters for emission decay traces of  $\text{Eu}^{3+}$  : EDTA. Note that the 0.05-0.5 eq. traces have been fit with a bi-exponential function

| $y = A1*\exp(-x/t1) + A2*\exp(-x/t2) + y0$ |             |            |         |            |           |            |
|--------------------------------------------|-------------|------------|---------|------------|-----------|------------|
| Trace                                      | y0          | y0 (Error) | A1      | A1 (Error) | t1        | t1 (error) |
| 0.05                                       | 2.77746E-5  | 4.33681E-6 | 0.2097  | 0.00196    | 112.1435  | 1.27065    |
| 0.1                                        | -3.66695E-5 | 4.48631E-6 | 0.18808 | 0.00345    | 101.44463 | 1.95507    |
| 0.2                                        | 5.141E-6    | 4.75709E-6 | 0.15137 | 0.00179    | 100.5097  | 1.95021    |
| 0.3                                        | 3.84374E-6  | 4.91936E-6 | 0.12724 | 0.00135    | 103.99027 | 2.03351    |
| 0.4                                        | -9.91226E-6 | 5.5693E-6  | 0.10405 | 0.00139    | 111.77184 | 2.57198    |
| 0.5                                        | 2.23623E-5  | 5.4108E-6  | 0.07909 | 0.00198    | 132.81916 | 3.49278    |
| Trace                                      |             |            | A2      | A2 (Error) | t2        | t2 (error) |
| 0.05                                       |             |            | 0.00817 | 0.003      | 235.58143 | 24.18941   |
| 0.1                                        |             |            | 0.03873 | 0.00514    | 198.84566 | 6.60211    |
| 0.2                                        |             |            | 0.05872 | 0.00316    | 220.01497 | 3.40661    |
| 0.3                                        |             |            | 0.06439 | 0.00241    | 240.66595 | 2.78712    |
| 0.4                                        |             |            | 0.07383 | 0.00239    | 260.67886 | 2.66747    |
| 0.5                                        |             |            | 0.0722  | 0.00276    | 283.34426 | 3.1816     |
| $y = A1*\exp(-x/t1) + y0$                  |             |            |         |            |           |            |
| Trace                                      | y0          | y0 (Error) | A1      | A1 (Error) | t1        | t1 (error) |
| 0.6                                        | 5.78785E-5  | 6.7356E-6  | 0.1272  | 1.89374E-4 | 247.13064 | 0.31496    |
| 0.7                                        | 1.2453E-4   | 6.99623E-6 | 0.12316 | 1.71581E-4 | 268.80265 | 0.33428    |
| 0.8                                        | 5.97184E-5  | 6.16966E-6 | 0.12457 | 1.34812E-4 | 289.3119  | 0.28961    |
| 0.9                                        | 3.41393E-6  | 6.16791E-6 | 0.12461 | 1.25888E-4 | 302.4841  | 0.28865    |
| 1                                          | -2.052E-5   | 5.89362E-6 | 0.12322 | 1.15499E-4 | 310.73524 | 0.27858    |
| 1.5                                        | 5.50488E-5  | 7.76593E-6 | 0.11879 | 1.09634E-4 | 390.03251 | 0.38108    |
| 2                                          | 1.03164E-4  | 8.98538E-6 | 0.10338 | 8.47943E-5 | 525.91178 | 0.51852    |
| 3                                          | -1.06215E-5 | 1.17413E-5 | 0.08808 | 6.28974E-5 | 801.66684 | 0.83823    |



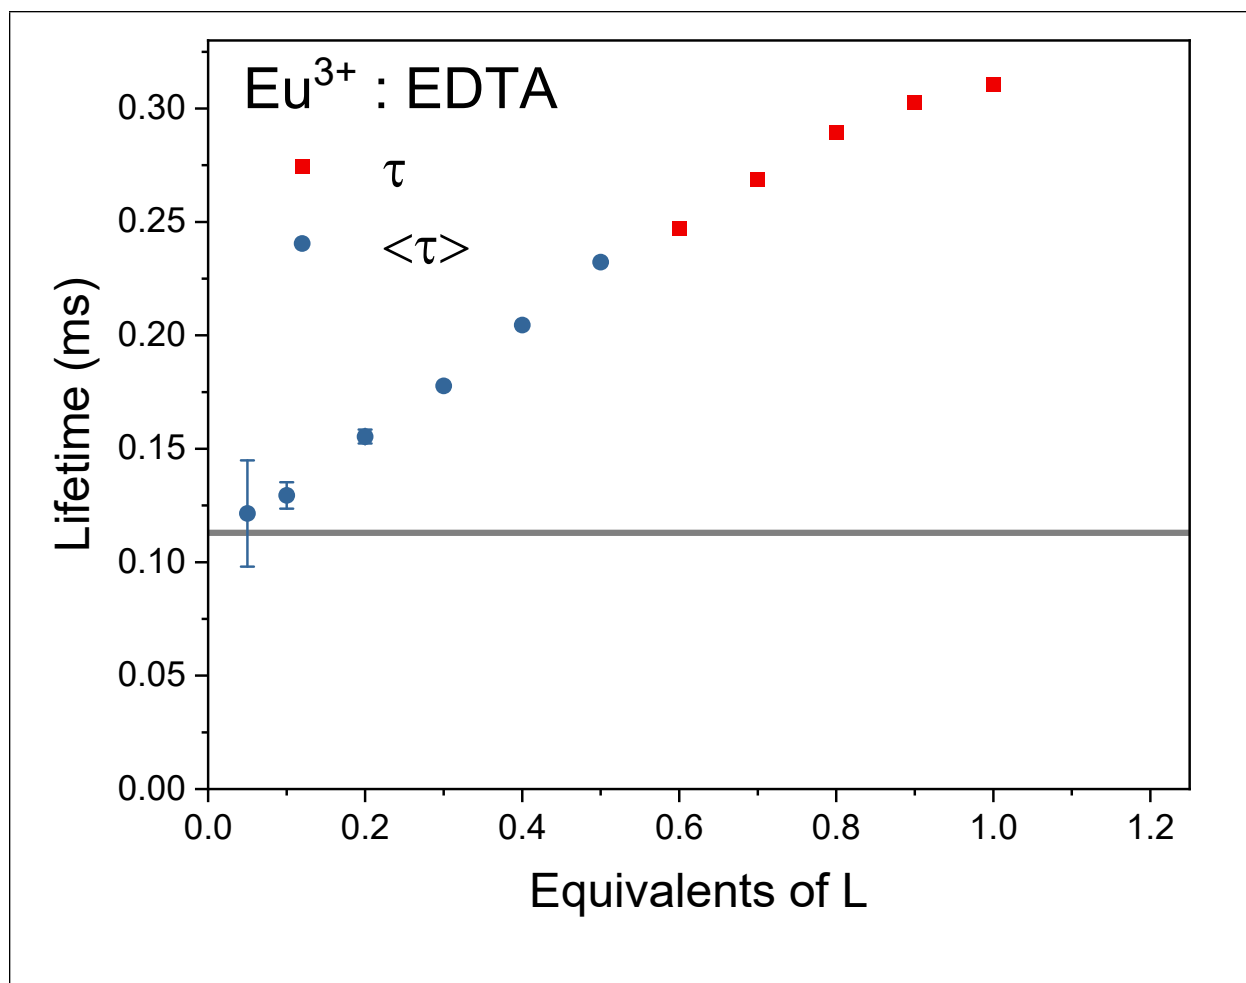

**Figure S7.** Excited state lifetime of Eu<sup>3+</sup> in NaCl-MES buffer as a function of equivalents of EDTA. The lifetimes has been determined from either a mono-exponential decay function (red) or an average of a bi-exponential decay function. The grey bar indicates the excited state lifetime of Eu<sup>3+</sup> in water. Error bars not shown are smaller than the data point

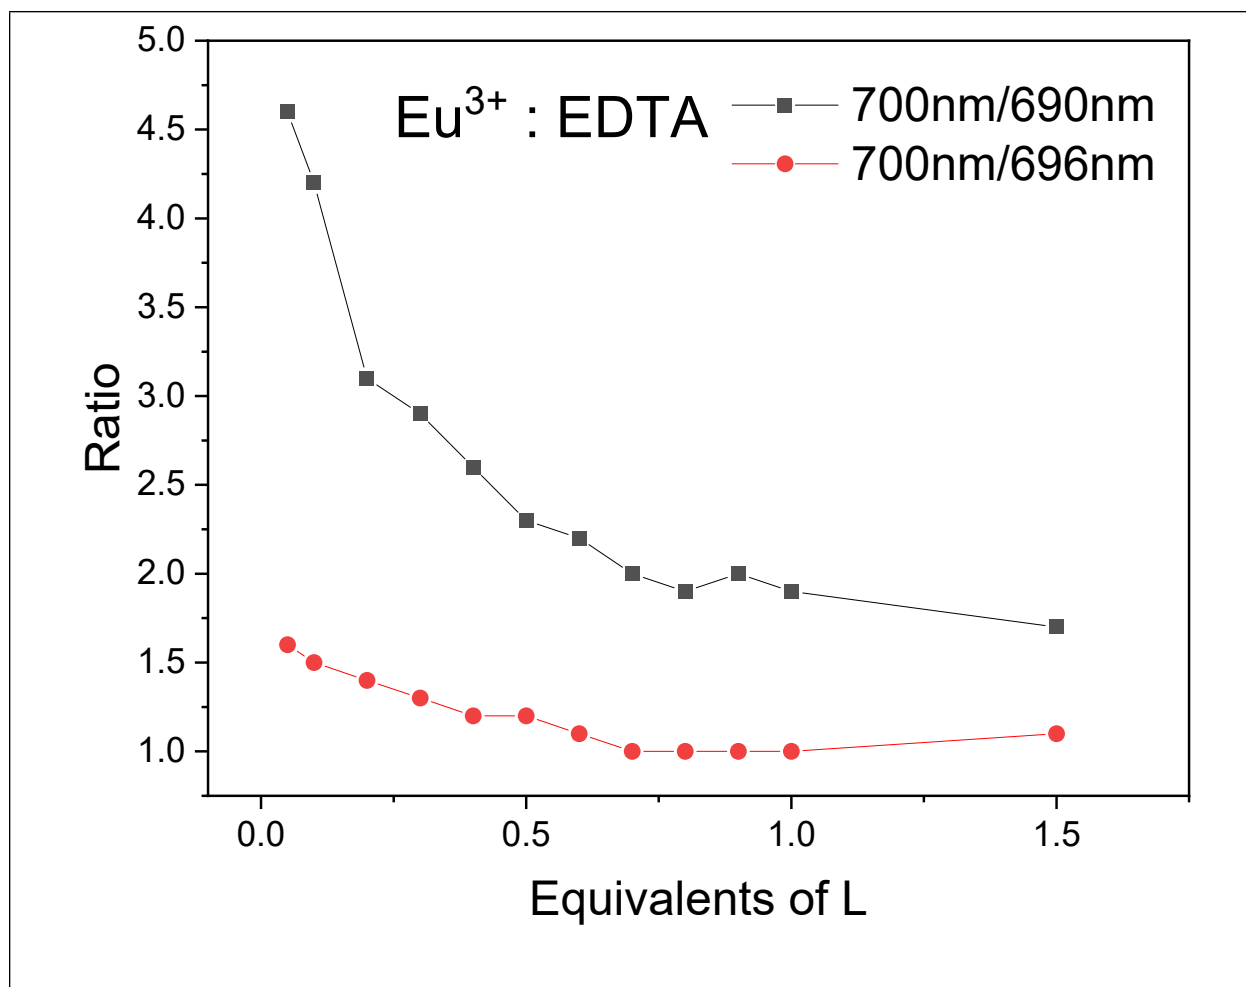

**Figure S8.** Ratios of emission intensity of Eu<sup>3+</sup> in NaCl-MES buffer as a function of equivalents of EDTA. The ratios give an indication of the changes in LF-splitting (see main text).

**Eu<sup>3+</sup> : AcO<sup>-</sup>**

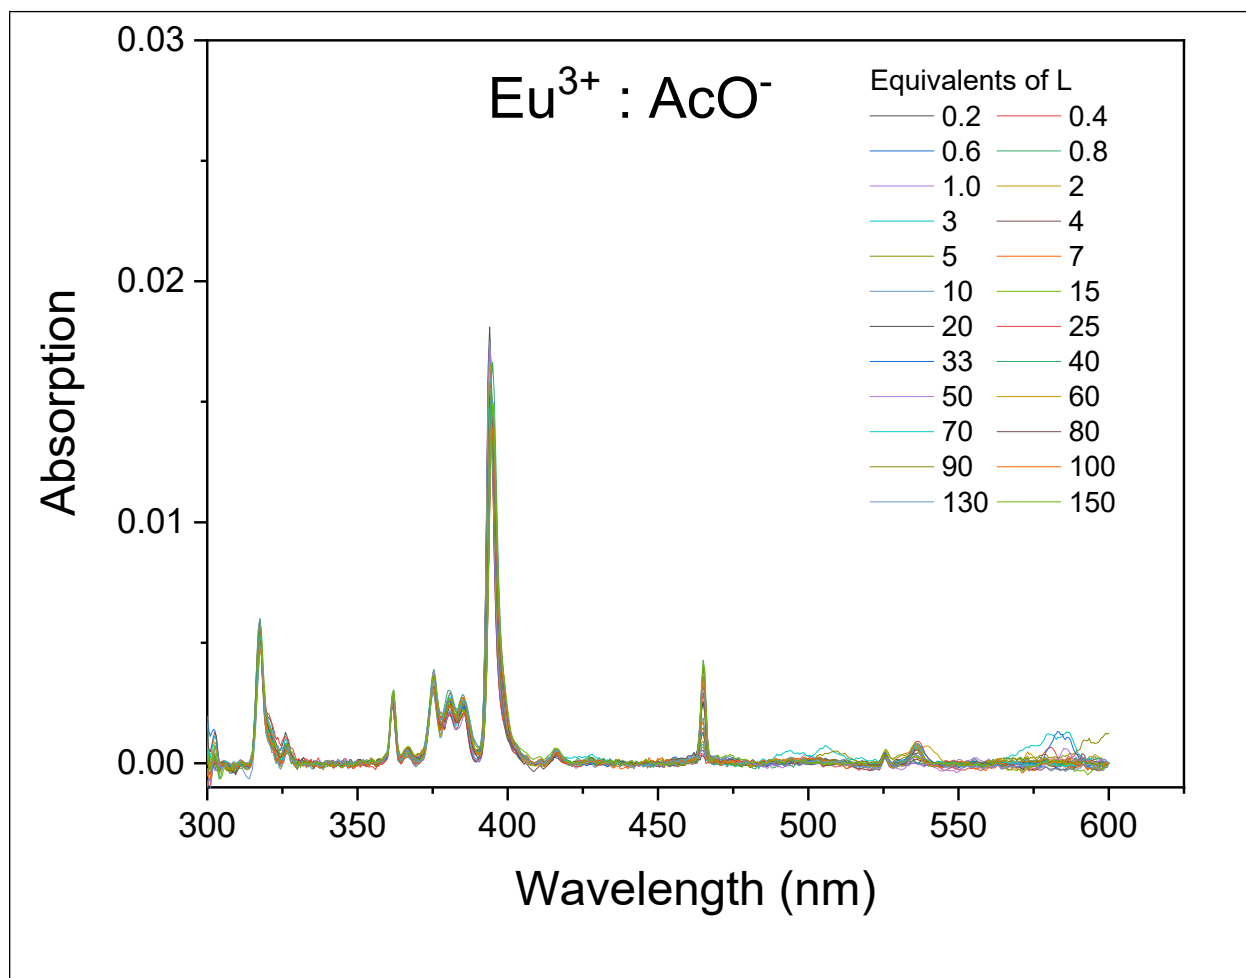

**Figure S9.** Absorption of Eu<sup>3+</sup> in KCl-MES buffer with various equivalents of AcO<sup>-</sup>.

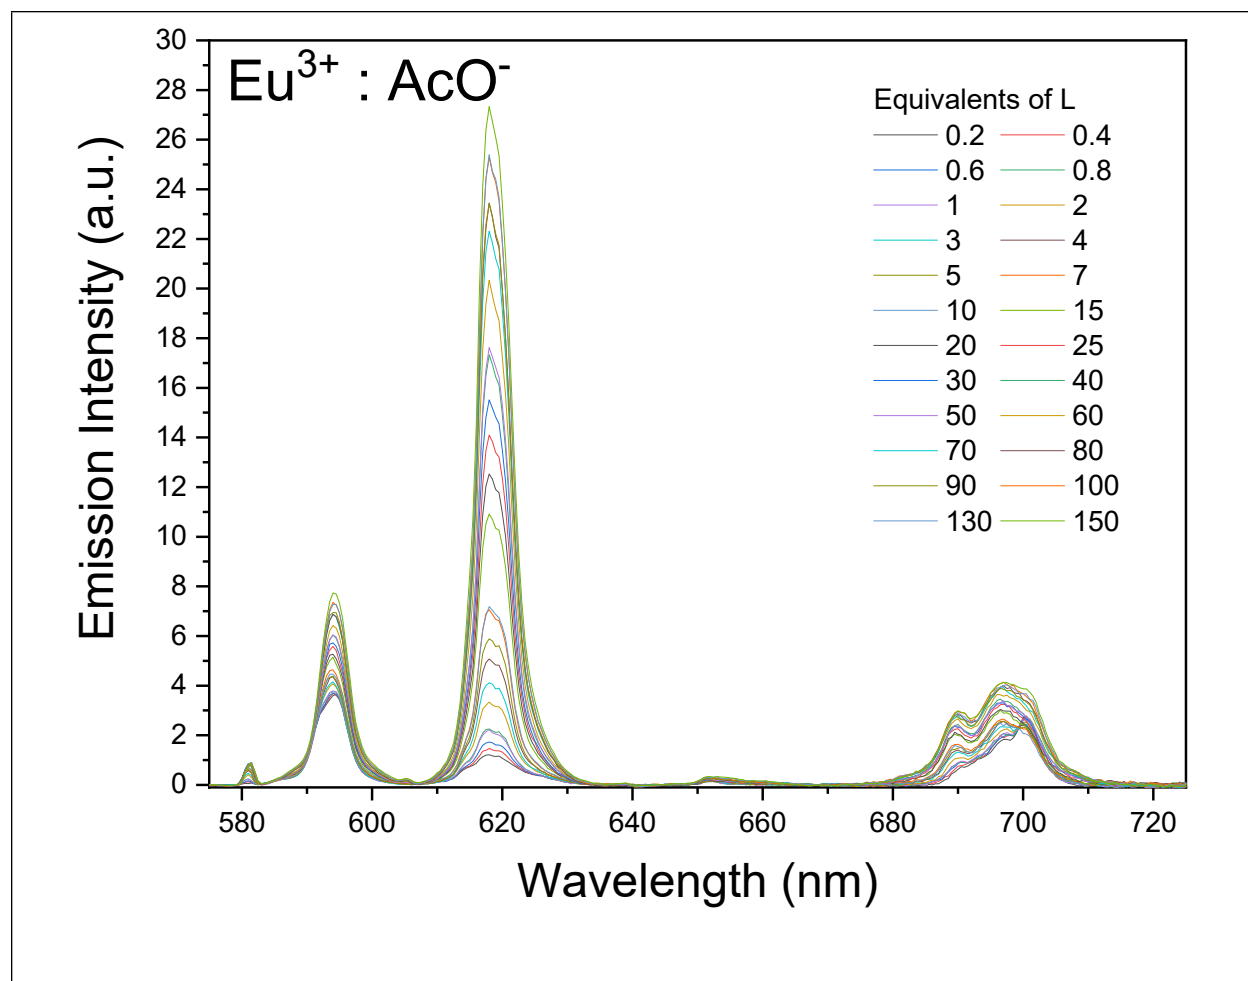

**Figure S10.** Emission spectrum of Eu<sup>3+</sup> in KCl-MES buffer with various equivalents of AcO<sup>-</sup>.

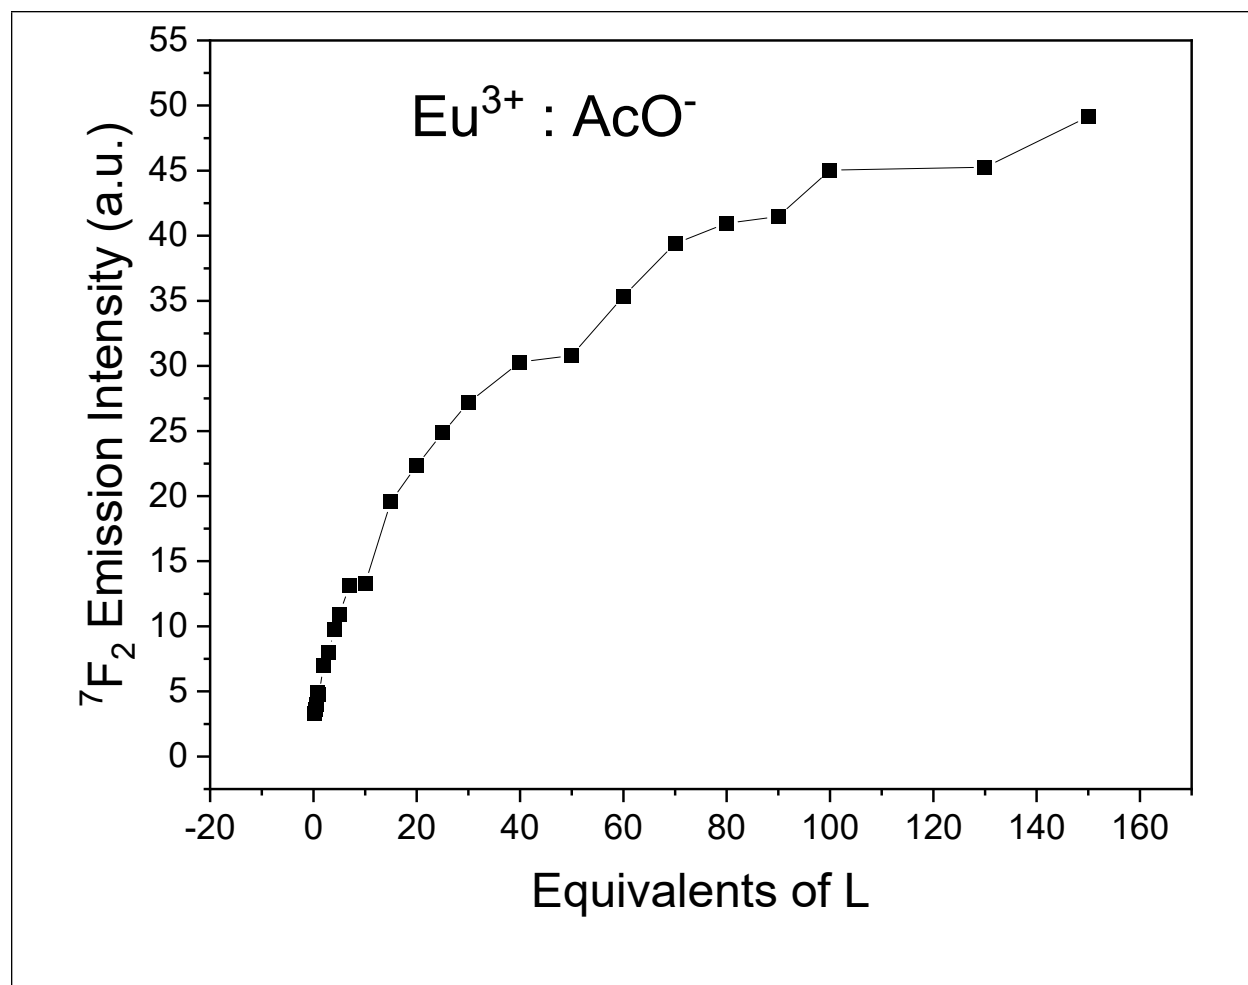

**Figure S11.** Emission intensity of the  $^5D_0 \rightarrow ^7F_2$  emission band of  $\text{Eu}^{3+}$  in KCl-MES buffer as a function of equivalents of  $\text{AcO}^-$ . The emission intensity was taken as the integration over the full  $^7F_2$  band (606-637 nm).

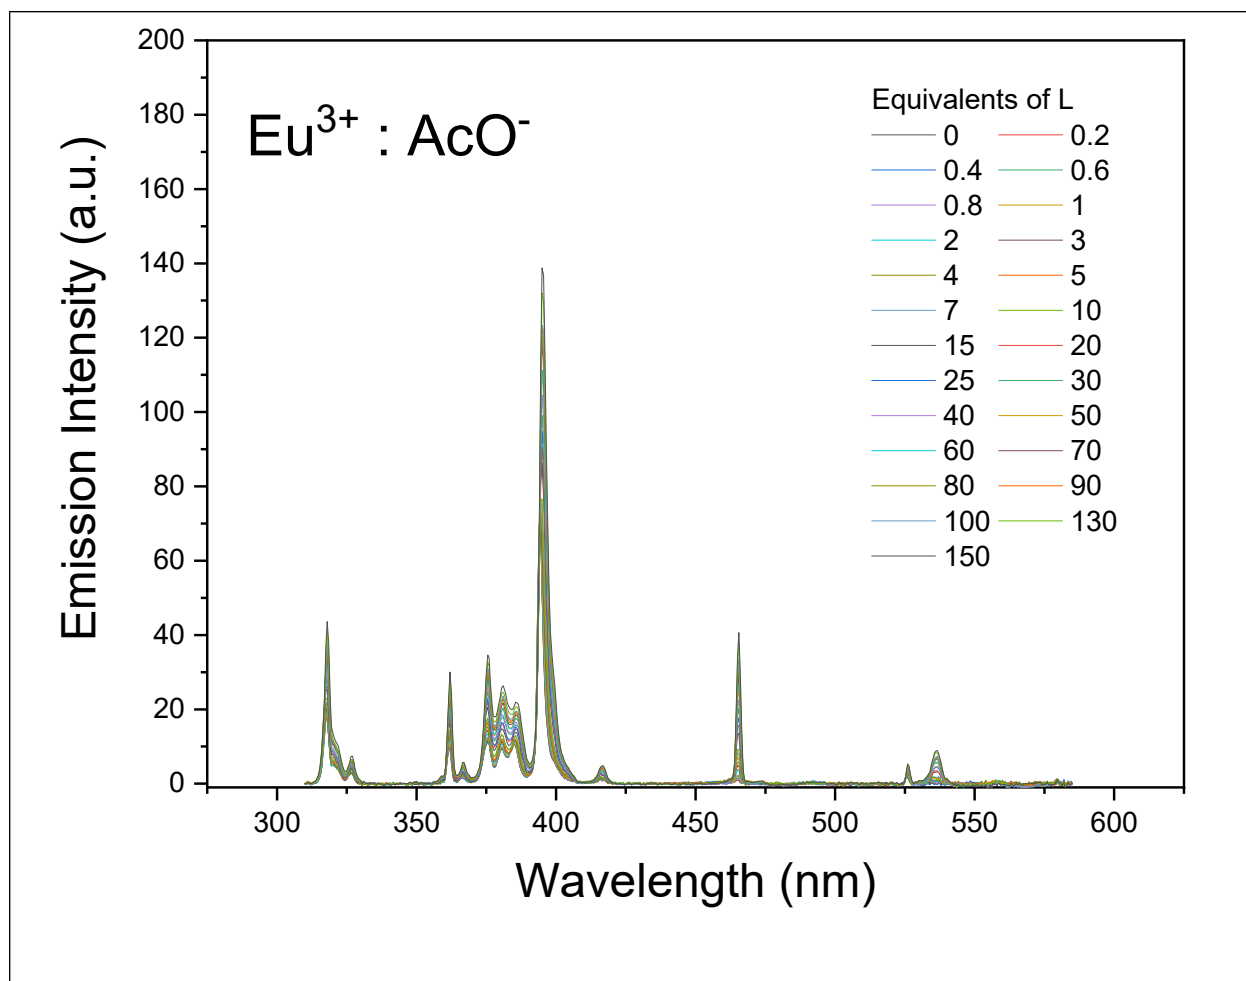

**Figure S12.** Excitation spectra of  $\text{Eu}^{3+}$  in KCl-MES buffer with various equivalents of  $\text{AcO}^-$ .

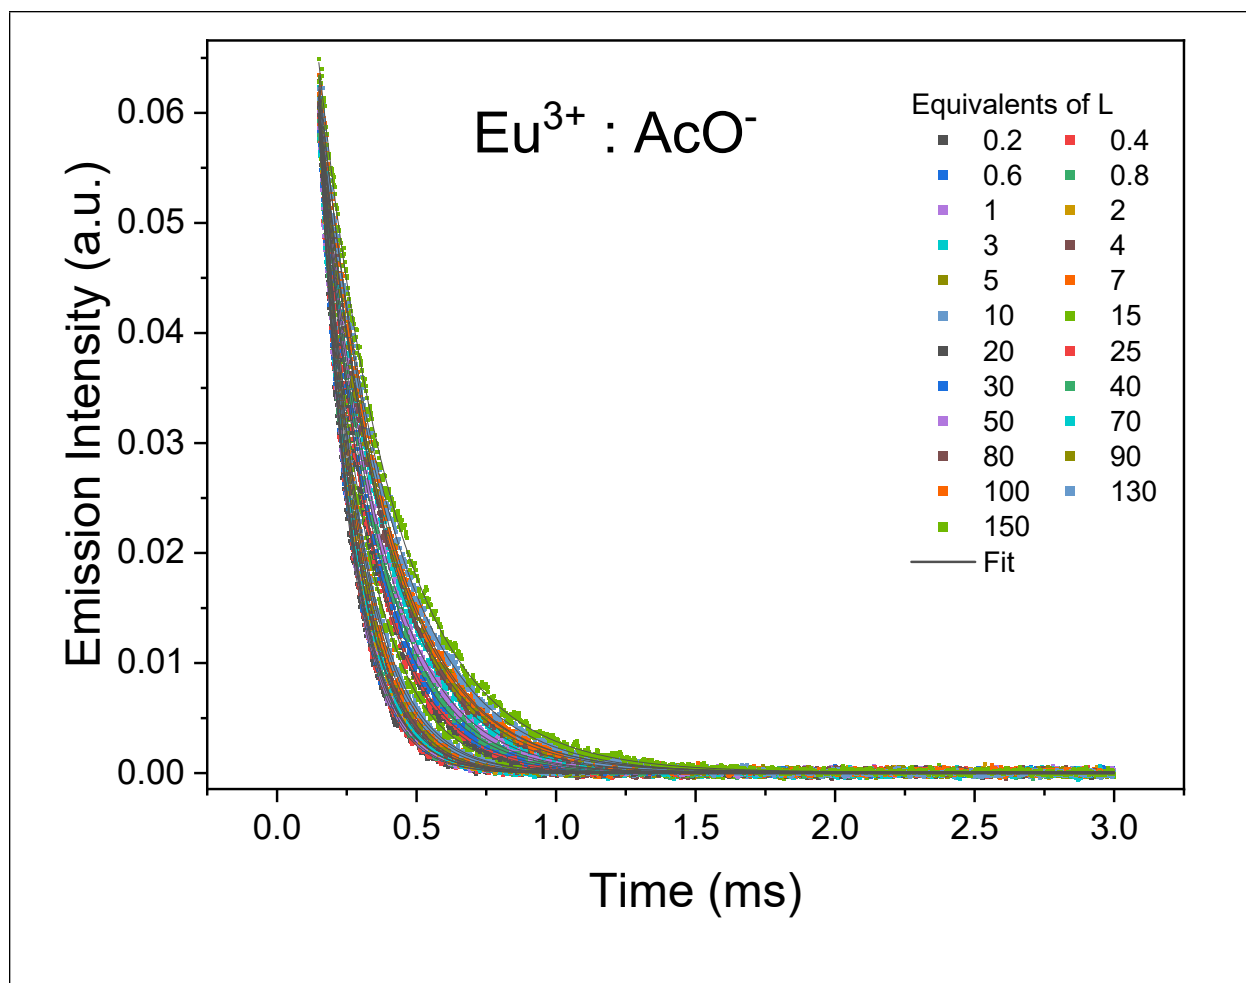

**Figure S13.** Time-resolved emission decay trace of  $\text{Eu}^{3+}$  in KCl-MES buffer with various equivalents of  $\text{AcO}^-$ . The decay traces has been fit with a mono-exponential decay function.

**Table S2.** Fitting parameters for emission decay traces of Eu<sup>3+</sup> : AcO.

| Trace | $y = A1 \cdot \exp(-x/t1) + y0$ |            |         |            |           |            |
|-------|---------------------------------|------------|---------|------------|-----------|------------|
|       | y0                              | y0 (Error) | A1      | A1 (Error) | t1        | t1 (error) |
| 0.2   | -2.49647E-5                     | 6.05282E-6 | 0.23158 | 5.98309E-4 | 110.82767 | 0.15312    |
| 0.4   | -6.72781E-5                     | 6.90522E-6 | 0.22266 | 6.2808E-4  | 114.45941 | 0.17668    |
| 0.6   | 1.30635E-4                      | 6.23495E-6 | 0.21418 | 5.3962E-4  | 116.71849 | 0.16317    |
| 0.8   | -4.99712E-5                     | 7.07855E-6 | 0.20757 | 5.65756E-4 | 120.4849  | 0.18634    |
| 1     | 5.08292E-5                      | 7.57766E-6 | 0.20939 | 6.30542E-4 | 118.55568 | 0.20029    |
| 2     | 6.11809E-5                      | 7.50846E-6 | 0.2066  | 5.59607E-4 | 123.94984 | 0.19432    |
| 3     | -3.5316E-5                      | 7.72802E-6 | 0.18948 | 5.21204E-4 | 129.17782 | 0.21162    |
| 4     | -3.08636E-5                     | 7.66779E-6 | 0.19099 | 4.87345E-4 | 132.44527 | 0.20476    |
| 5     | -3.17756E-5                     | 7.45318E-6 | 0.17815 | 4.16792E-4 | 139.93788 | 0.2059     |
| 7     | 6.02524E-5                      | 8.83932E-6 | 0.17436 | 4.63954E-4 | 143.88834 | 0.24533    |
| 10    | -9.09468E-6                     | 8.10866E-6 | 0.16555 | 3.88827E-4 | 149.81998 | 0.23161    |
| 15    | -2.60939E-5                     | 8.11049E-6 | 0.14662 | 3.10425E-4 | 166.30946 | 0.24809    |
| 20    | -2.09934E-5                     | 9.32502E-6 | 0.14395 | 3.17137E-4 | 176.03965 | 0.28337    |
| 25    | 5.56065E-5                      | 8.5598E-6  | 0.13607 | 2.68914E-4 | 183.04177 | 0.2709     |
| 33    | 4.41245E-5                      | 9.1438E-6  | 0.12995 | 2.56748E-4 | 193.65593 | 0.29678    |
| 40    | -3.23022E-5                     | 8.91394E-6 | 0.12605 | 2.26604E-4 | 203.79343 | 0.29329    |
| 50    | 6.98088E-5                      | 1.10835E-5 | 0.1238  | 2.6218E-4  | 211.60217 | 0.36709    |
| 60    | 3.92326E-5                      | 7.1595E-6  | 0.05987 | 1.53558E-4 | 222.89247 | 0.48338    |
| 70    | -3.88514E-5                     | 1.00449E-5 | 0.12096 | 2.11226E-4 | 225.27013 | 0.33474    |
| 80    | 9.12452E-5                      | 1.00143E-5 | 0.11529 | 1.96025E-4 | 234.17269 | 0.34682    |
| 90    | 9.53848E-5                      | 1.08702E-5 | 0.11281 | 1.99829E-4 | 242.35938 | 0.38177    |
| 100   | 7.06623E-5                      | 9.86731E-6 | 0.11793 | 1.82415E-4 | 241.61147 | 0.33173    |
| 130   | -4.91215E-5                     | 1.12128E-5 | 0.11133 | 1.81749E-4 | 259.90975 | 0.39347    |
| 150   | 6.86499E-5                      | 1.17069E-5 | 0.11207 | 1.75588E-4 | 271.52543 | 0.40497    |



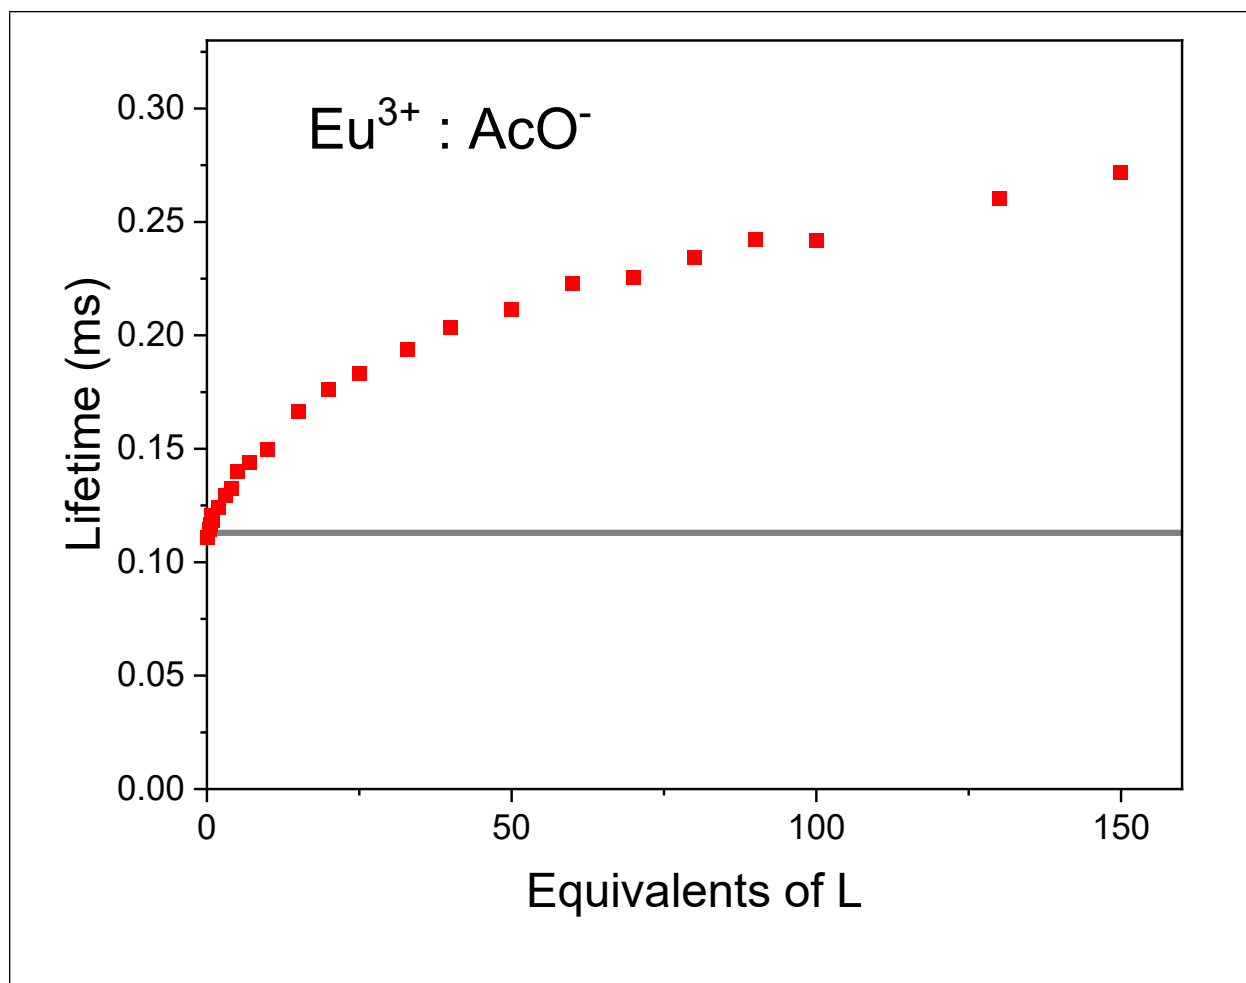

**Figure S14.** Excited state lifetime of Eu<sup>3+</sup> in KCl-MES buffer as a function of equivalents of AcO<sup>-</sup>. The lifetimes has been determined from a mono-exponential decay function. The grey bar indicates the excited state lifetime of Eu<sup>3+</sup> in water.

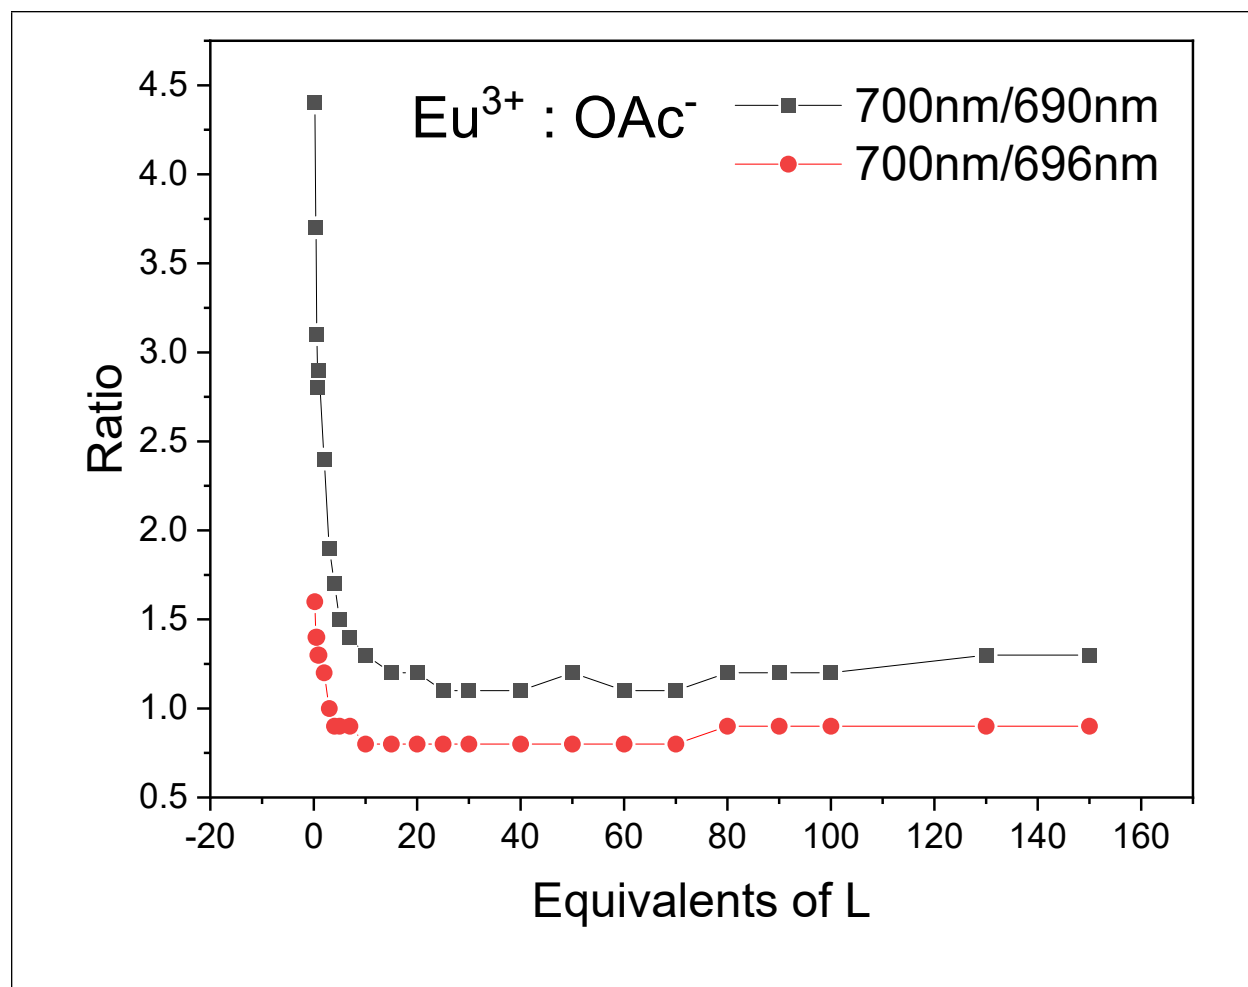

**Figure S15.** Ratios of emission intensity of Eu<sup>3+</sup> in KCl-MES buffer as a function of equivalents of AcO<sup>-</sup>. The ratios give an indication of the changes in LF-splitting (see main text).

$\text{Eu}^{3+} : \text{NO}_3^-$

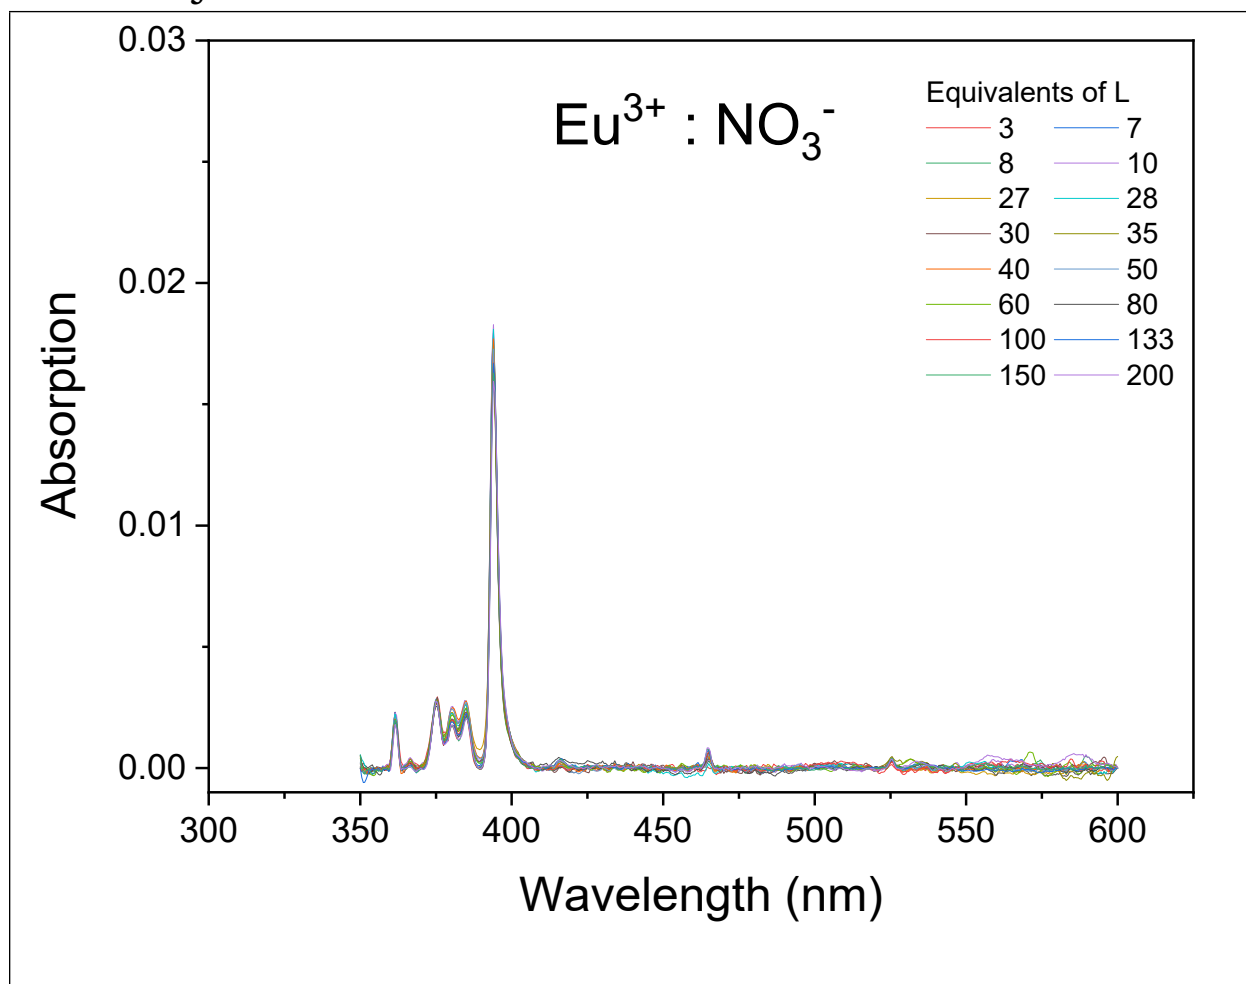

Figure S16. Absorption of  $\text{Eu}^{3+}$  in KCl-MES buffer with various equivalents of  $\text{NO}_3^-$ .

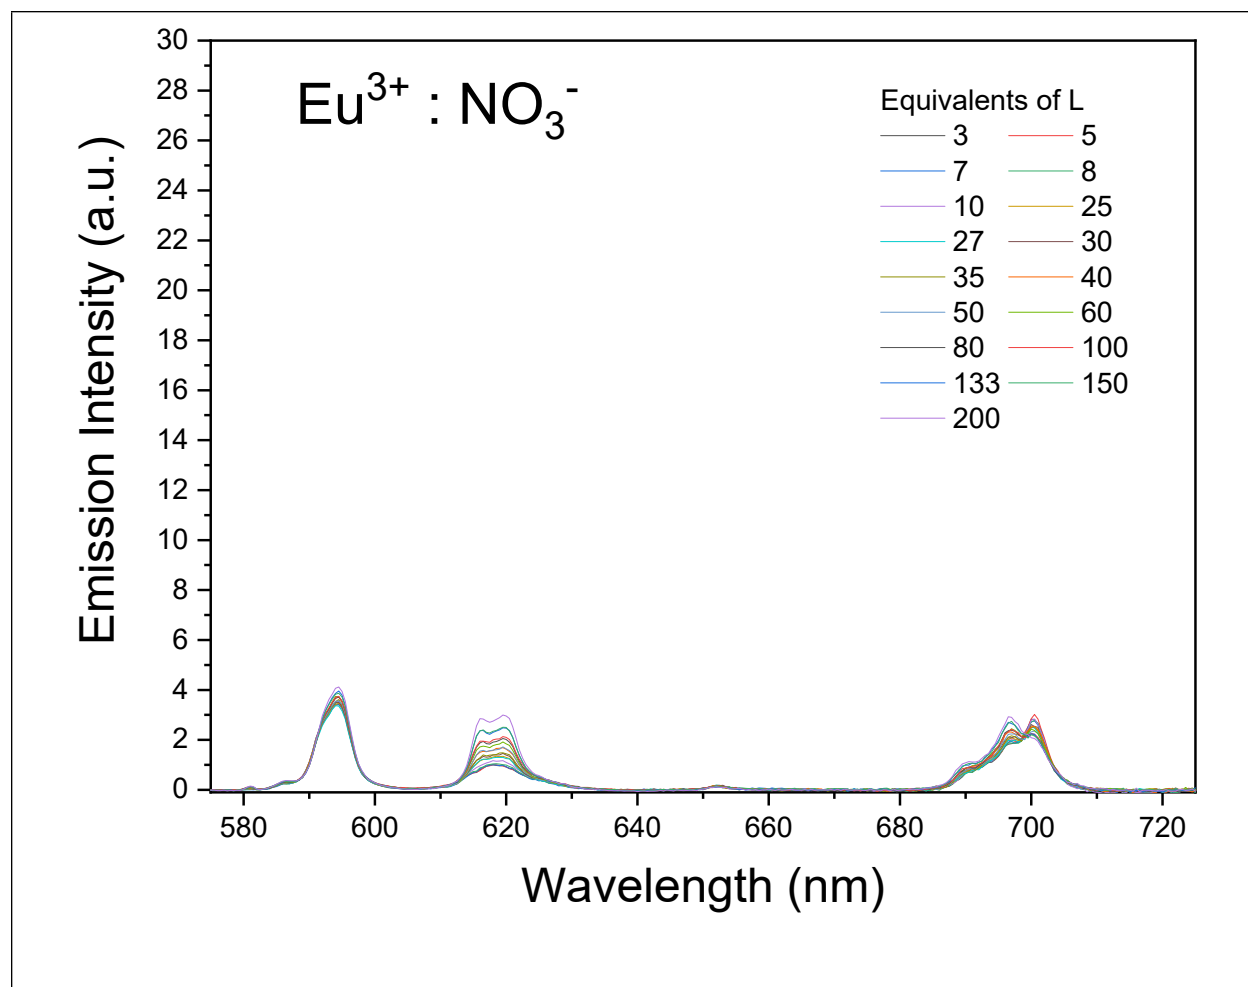

**Figure S17.** Emission spectra of  $\text{Eu}^{3+}$  in KCl-MES buffer with various equivalents of  $\text{NO}_3^-$ .

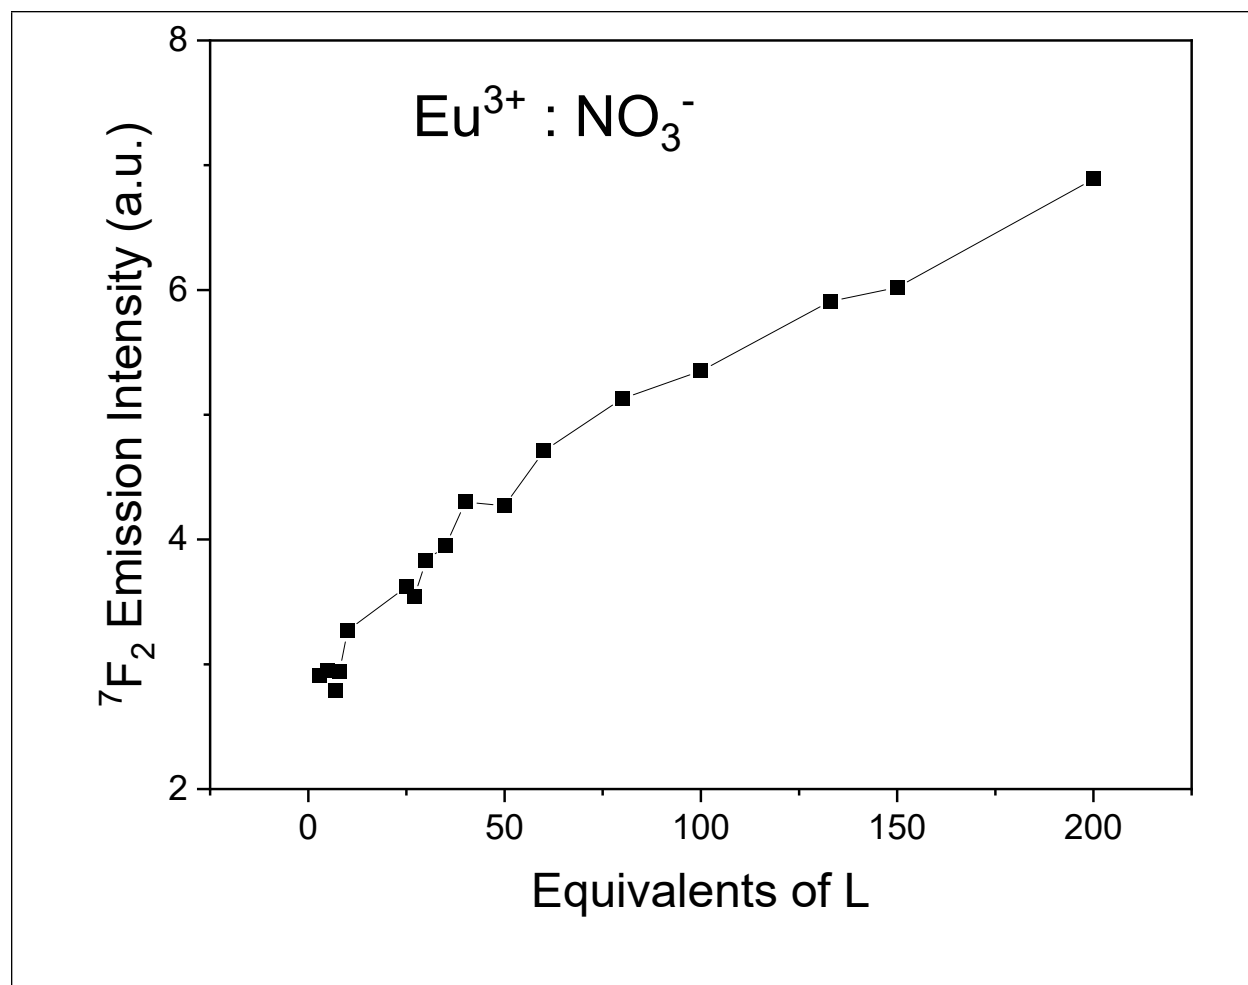

**Figure S18.** Emission intensity of the  $^5D_0 \rightarrow ^7F_2$  emission band of  $\text{Eu}^{3+}$  in KCl-MES buffer as a function of equivalents of  $\text{NO}_3^-$ . The emission intensity was taken as the integration over the full  $^7F_2$  band (606-637 nm).

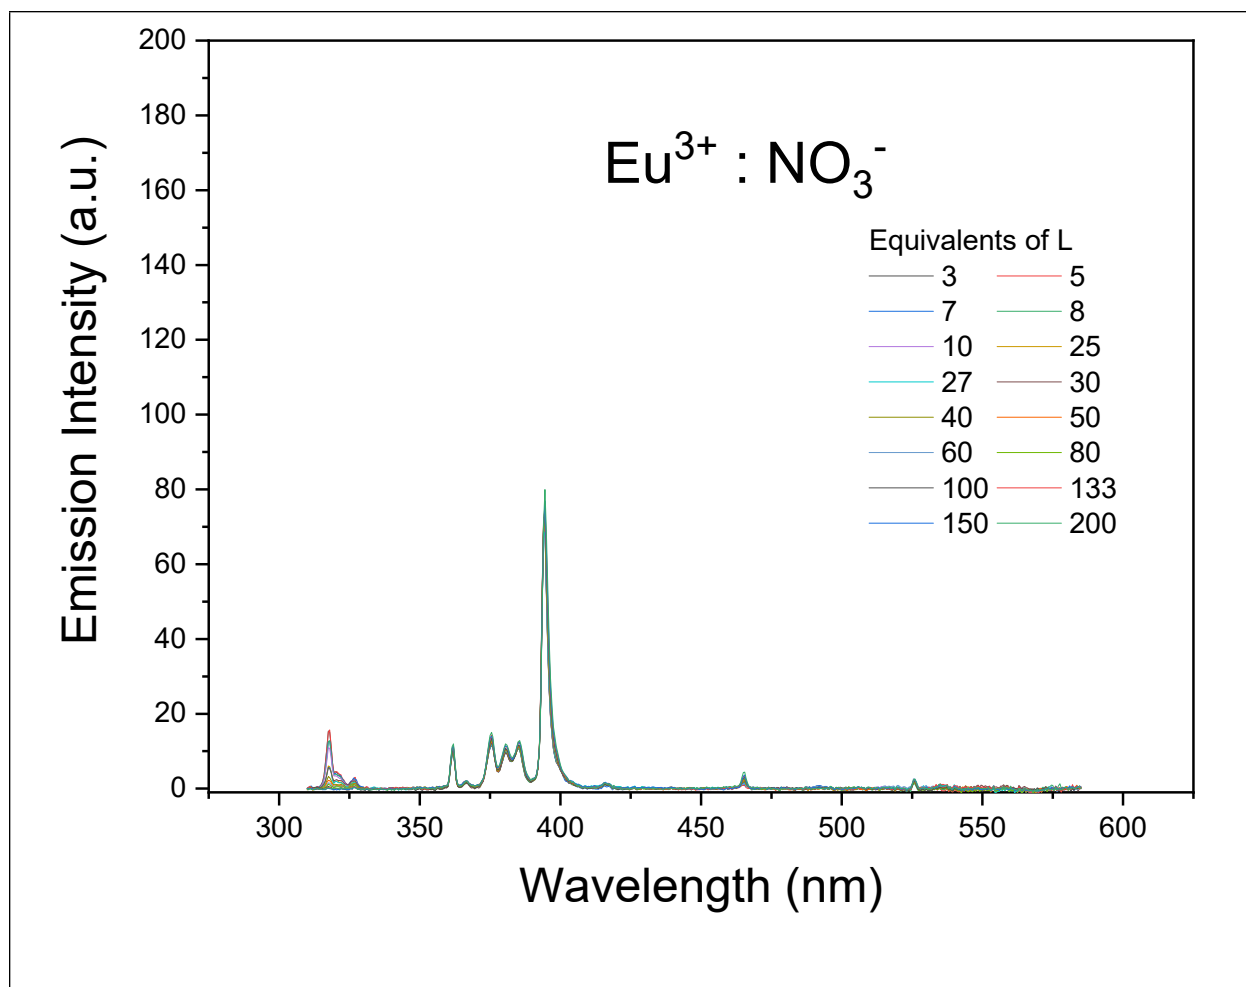

**Figure S19.** Excitation spectra of  $\text{Eu}^{3+}$  in KCl-MES buffer with various equivalents of  $\text{NO}_3^-$ .

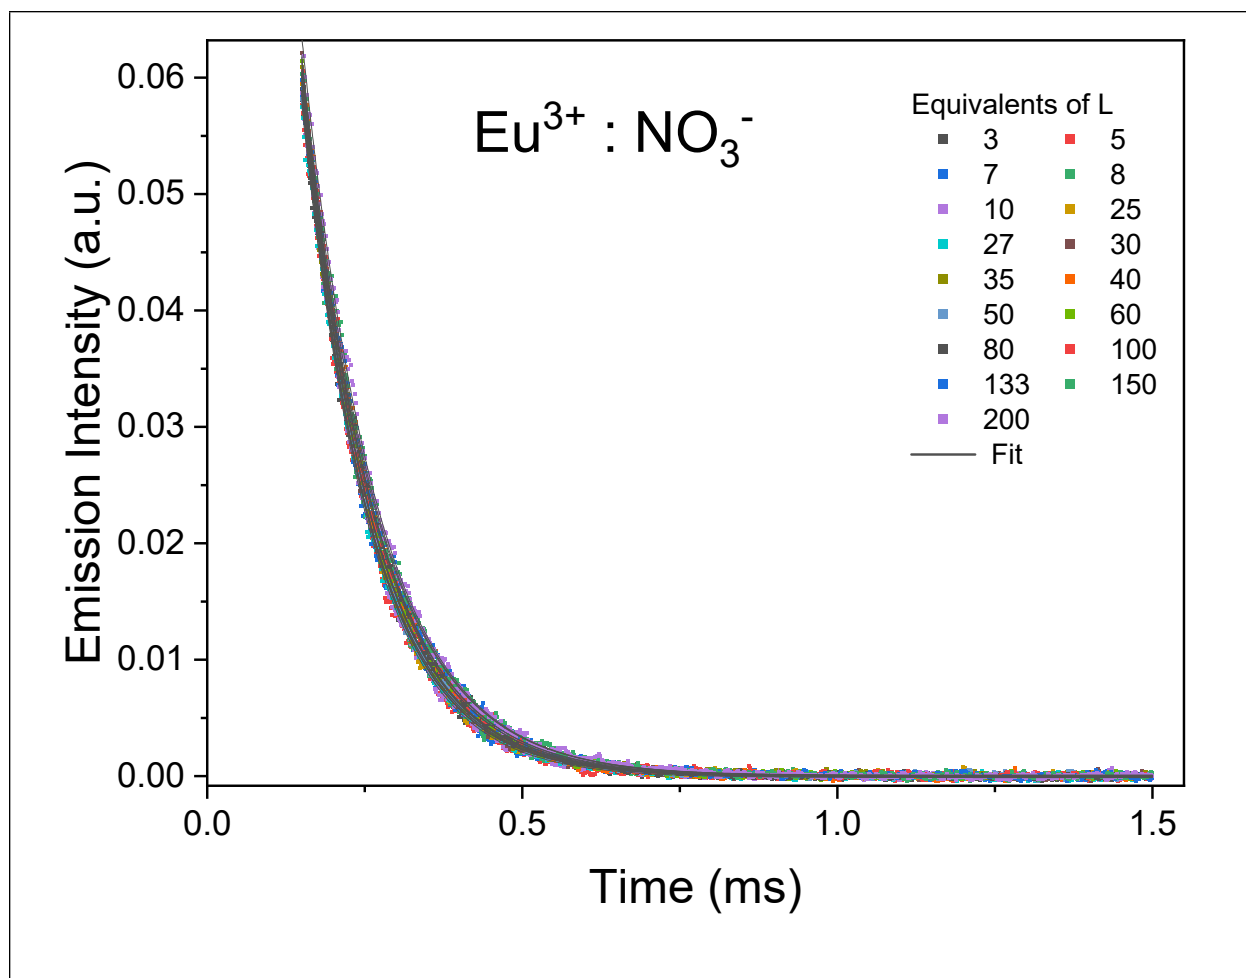

**Figure S20.** Time-resolved emission decay trace of  $\text{Eu}^{3+}$  in KCl-MES buffer with various equivalents of  $\text{NO}_3^-$ . The decay traces has been fit with a mono-exponential decay function.

**Table S3.** Fitting parameters for emission decay traces of  $\text{Eu}^{3+} : \text{NO}_3^-$ .

| Trace | $y = A1 \cdot \exp(-x/t1) + y0$ |            |         |            |           |            |
|-------|---------------------------------|------------|---------|------------|-----------|------------|
|       | y0                              | y0 (Error) | A1      | A1 (Error) | t1        | t1 (error) |
| 3     | -6.10966E-5                     | 1.54932E-5 | 0.23175 | 0.00101    | 109.55214 | 0.25959    |
| 5     | -1.2103E-4                      | 1.43897E-5 | 0.23793 | 0.001      | 106.78968 | 0.24075    |
| 7     | -9.0178E-6                      | 1.54097E-5 | 0.24231 | 0.00107    | 106.89502 | 0.2529     |
| 8     | 2.14328E-5                      | 1.36274E-5 | 0.24277 | 9.44309E-4 | 106.9612  | 0.22309    |
| 10    | -2.15456E-5                     | 1.39593E-5 | 0.23658 | 9.45372E-4 | 107.85304 | 0.23261    |
| 25    | 2.40856E-5                      | 1.59653E-5 | 0.23673 | 0.00103    | 109.70589 | 0.26152    |
| 27    | -3.78839E-5                     | 1.39909E-5 | 0.22376 | 8.80096E-4 | 110.79793 | 0.24019    |
| 30    | 2.49096E-5                      | 1.49761E-5 | 0.2377  | 9.6491E-4  | 109.82939 | 0.24405    |
| 35    | 6.19089E-5                      | 1.65116E-5 | 0.23235 | 0.00103    | 110.97539 | 0.27257    |
| 40    | -9.4274E-5                      | 1.3722E-5  | 0.23021 | 7.97373E-4 | 114.09612 | 0.22285    |
| 50    | 1.304E-5                        | 1.31783E-5 | 0.23076 | 8.24857E-4 | 111.00121 | 0.219      |
| 60    | 3.62526E-7                      | 1.47433E-5 | 0.22442 | 8.53904E-4 | 114.23615 | 0.24534    |
| 80    | -6.42485E-5                     | 1.51861E-5 | 0.21761 | 8.23461E-4 | 117.09152 | 0.25493    |
| 100   | 7.69573E-5                      | 1.47529E-5 | 0.22631 | 8.44236E-4 | 114.75    | 0.24246    |
| 133   | -2.17635E-5                     | 1.46394E-5 | 0.21068 | 7.38558E-4 | 120.33804 | 0.24793    |
| 150   | 8.5243E-6                       | 1.58412E-5 | 0.2171  | 8.135E-4   | 119.52769 | 0.26185    |
| 200   | -1.2736E-5                      | 1.57835E-5 | 0.22347 | 8.14618E-4 | 119.29954 | 0.25388    |



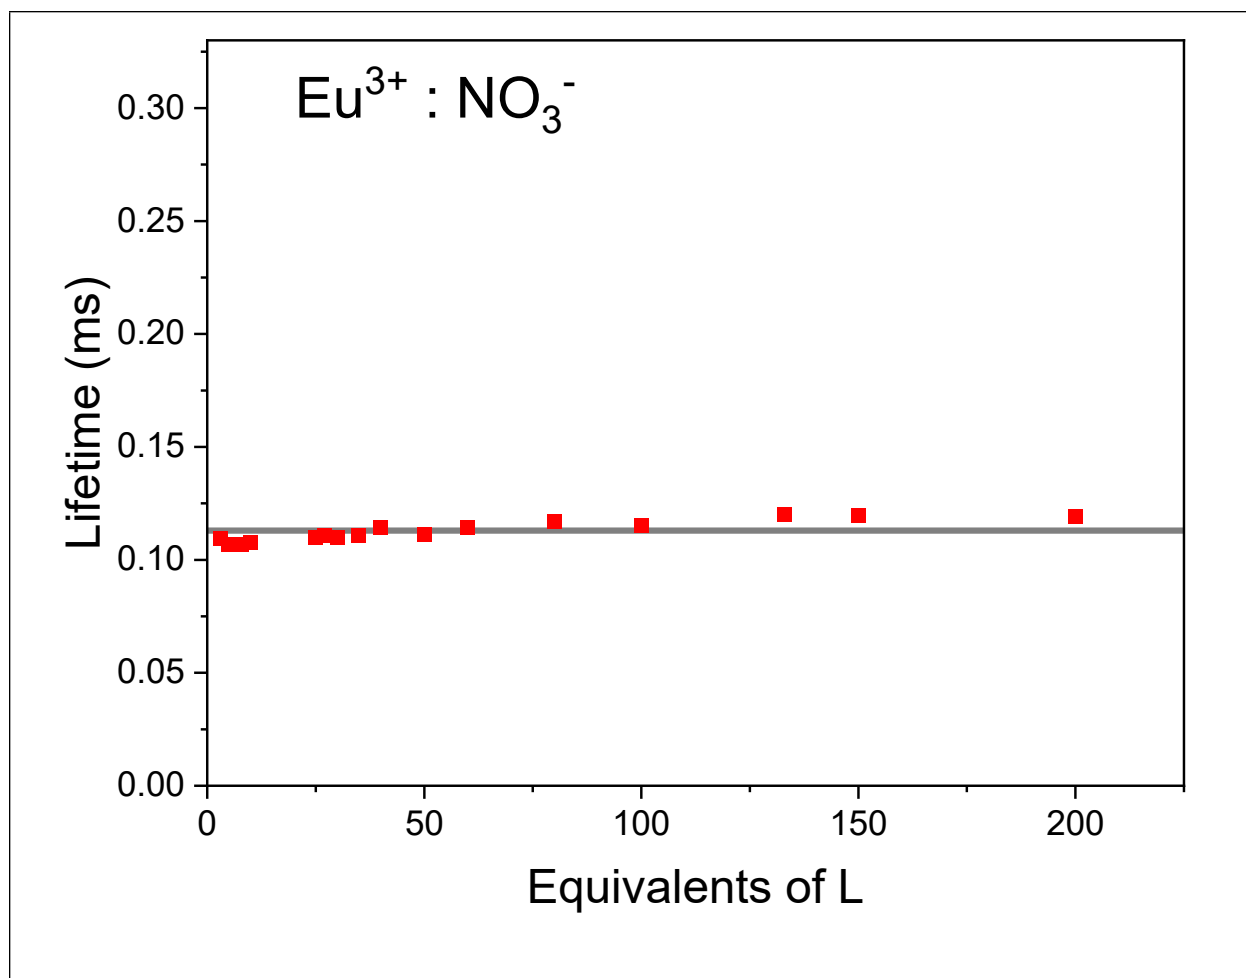

**Figure S21.** Excited state lifetime of  $\text{Eu}^{3+}$  in KCl-MES buffer as a function of equivalents of  $\text{NO}_3^-$ . The lifetimes has been determined from a mono-exponential decay function. The grey bar indicates the excited state lifetime of  $\text{Eu}^{3+}$  in water.

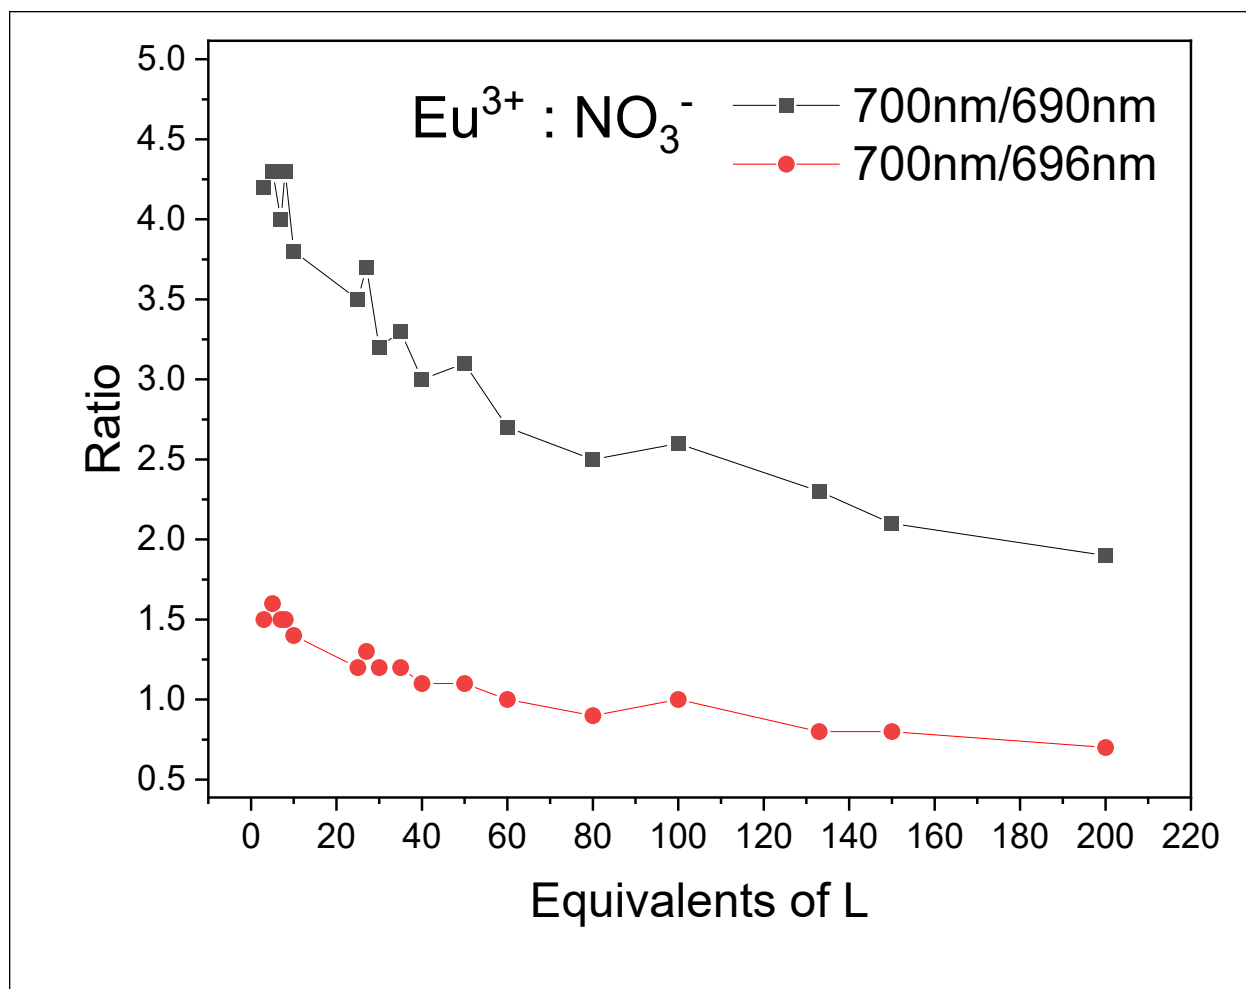

**Figure S22.** Ratios of emission intensity of  $\text{Eu}^{3+}$  in KCl-MES buffer as a function of equivalents of  $\text{NO}_3^-$ . The ratios give an indication of the changes in LF-splitting (see main text).

$\text{Eu}^{3+} : \text{HSO}_4^-$

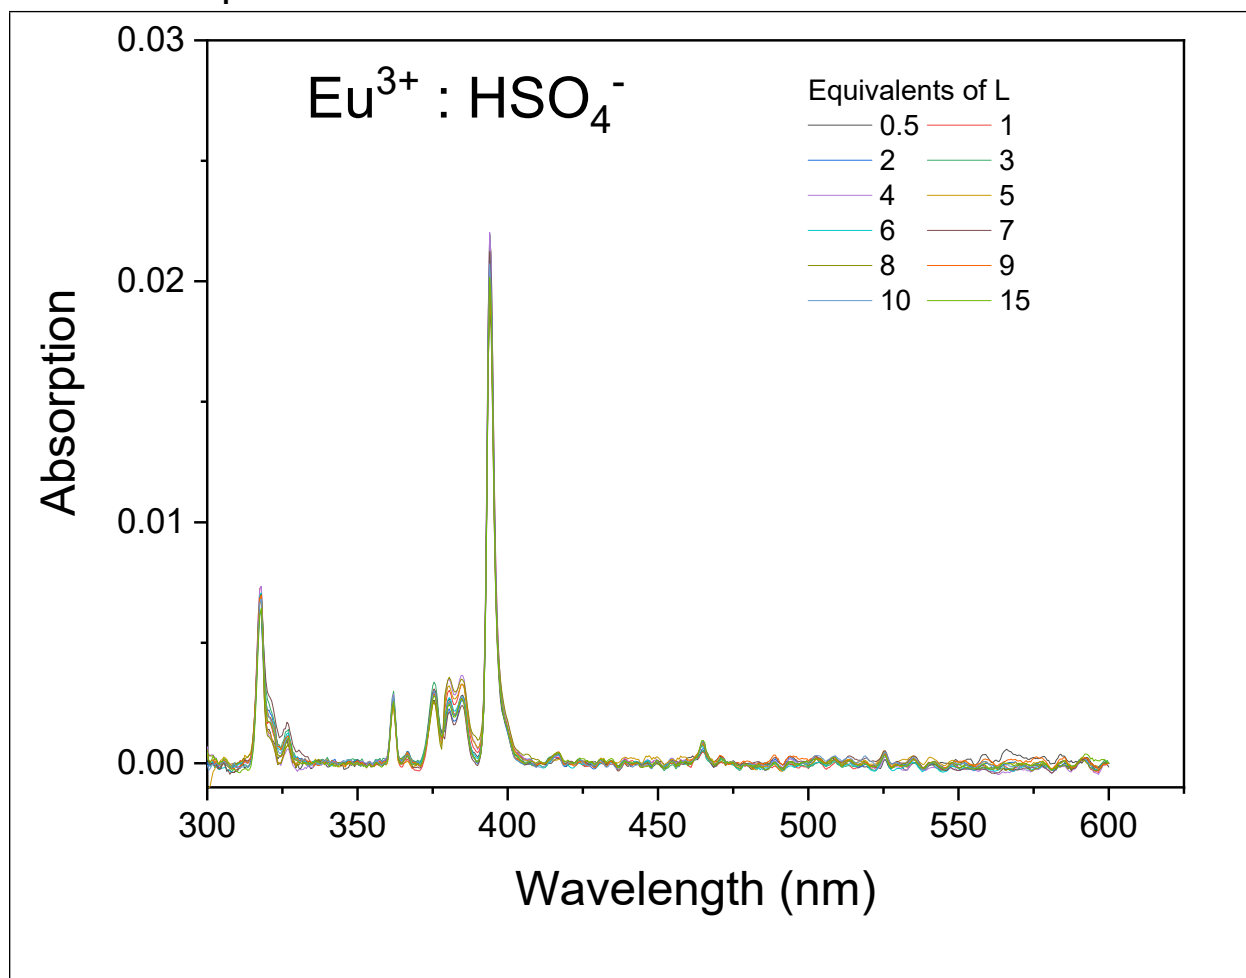

Figure S23. Absorption of  $\text{Eu}^{3+}$  in KCl-MES buffer with various equivalents of  $\text{HSO}_4^-$ .

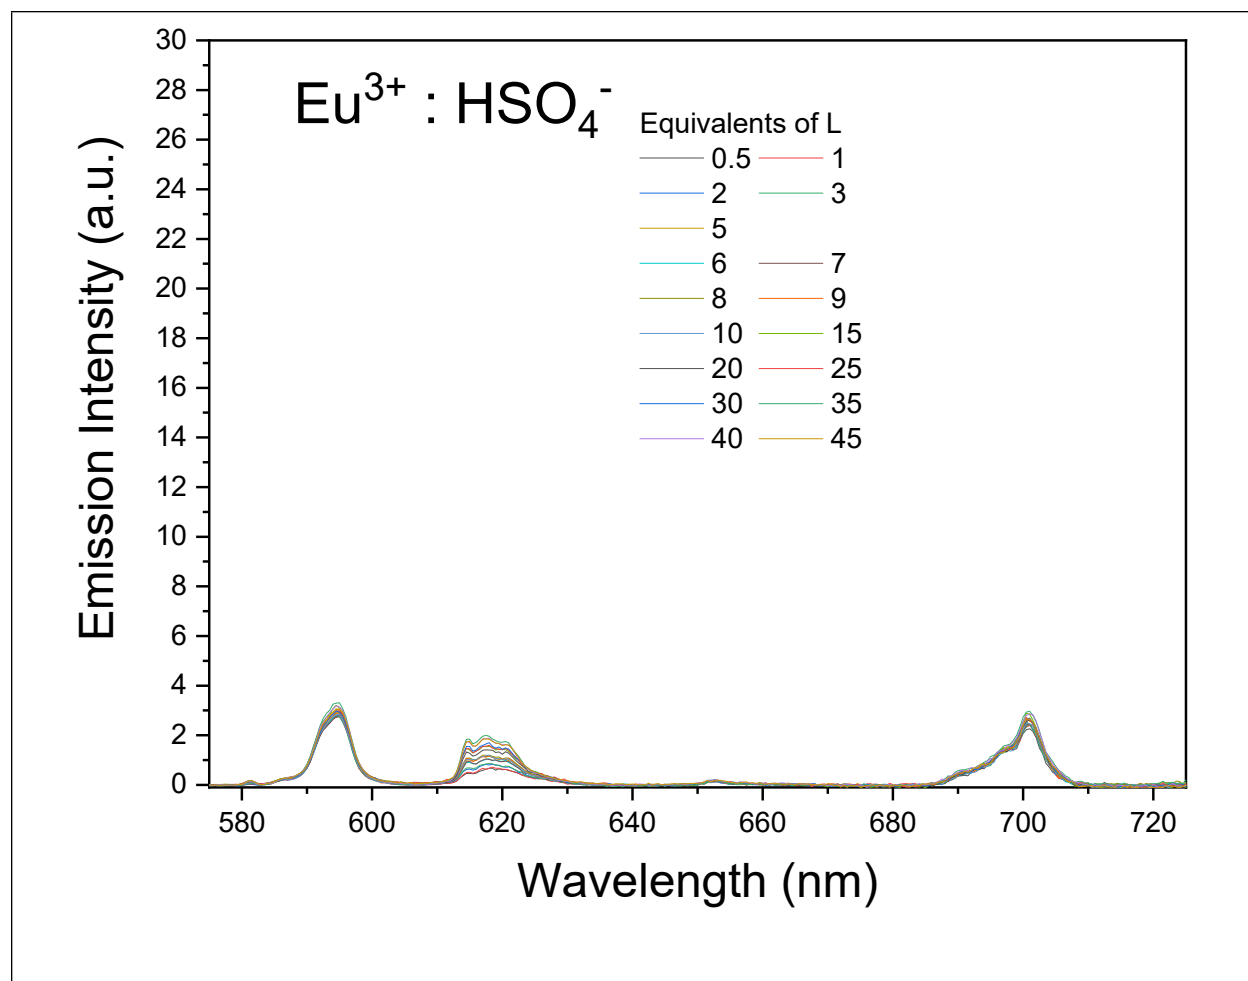

**Figure S24.** Emission spectrum of  $\text{Eu}^{3+}$  in KCl-MES buffer with various equivalents of  $\text{HSO}_4^-$ .

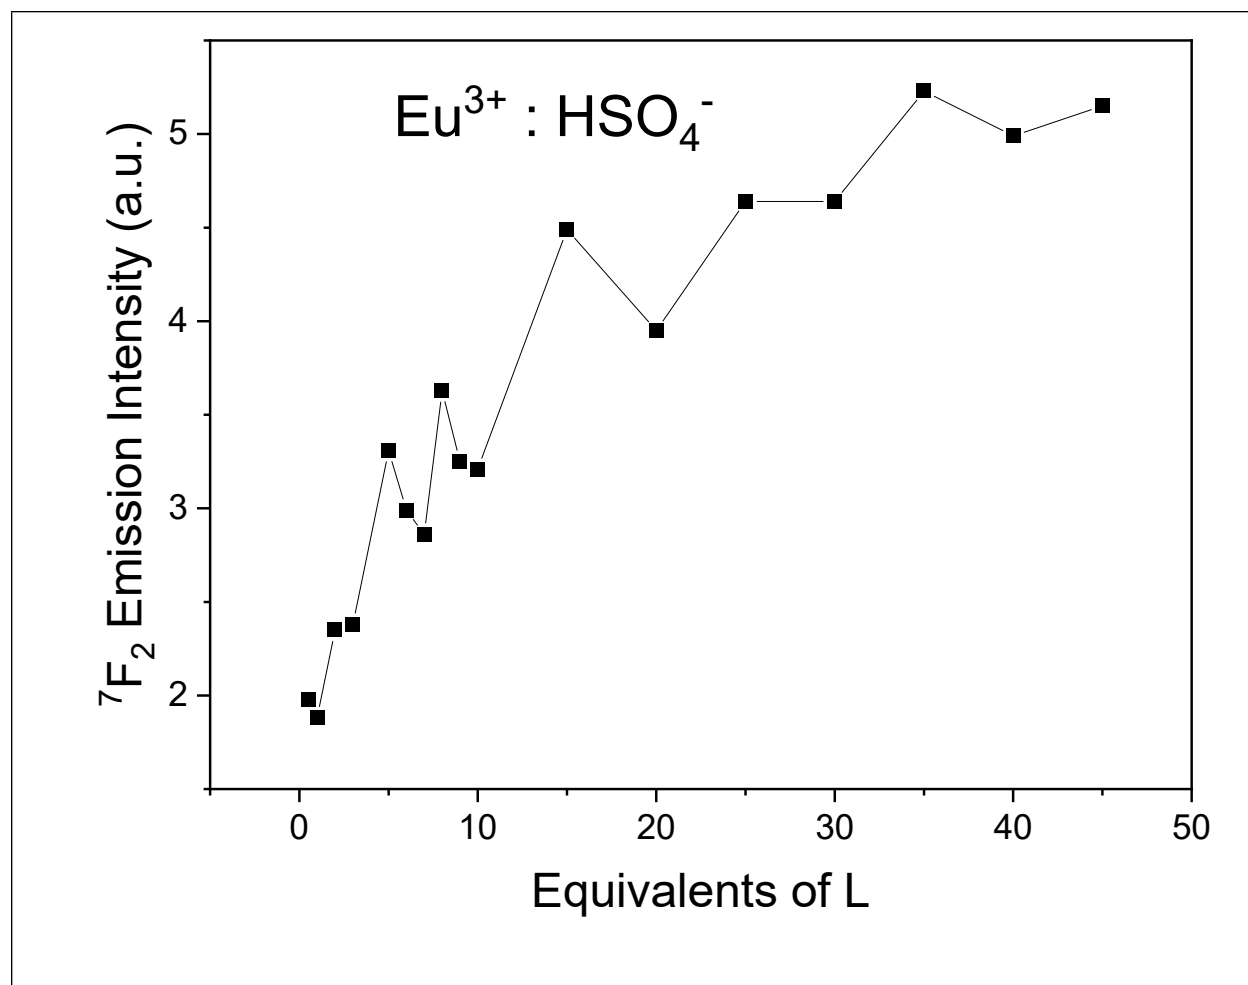

**Figure S 25.** Emission intensity of the  ${}^5D_0 \rightarrow {}^7F_2$  emission band of  $\text{Eu}^{3+}$  in KCl-MES buffer as a function of equivalents of  $\text{HSO}_4^-$ . The emission intensity was taken as the integration over the full  ${}^7F_2$  band (606-637 nm).

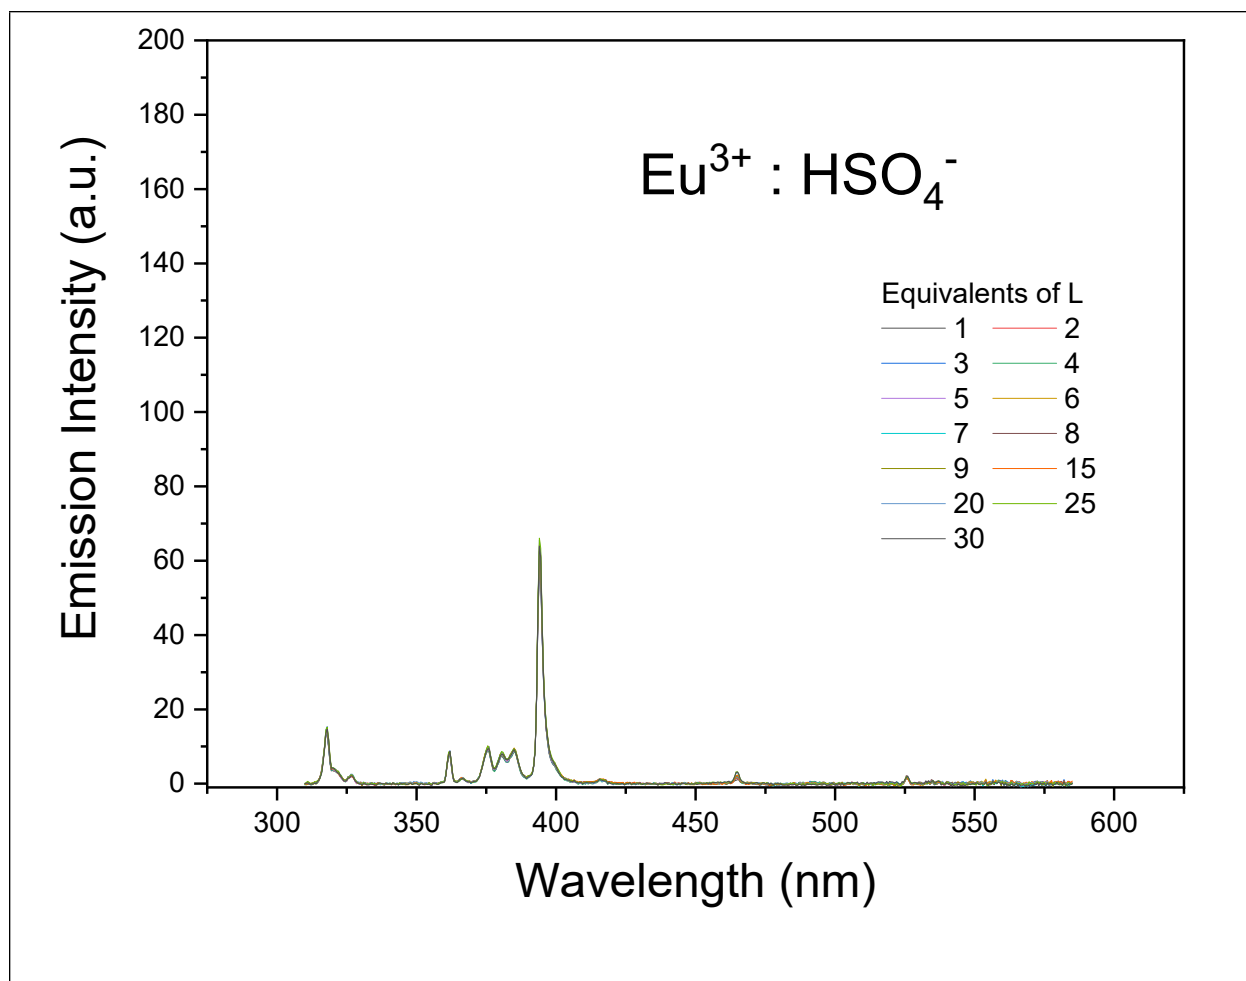

Figure S26. Excitation spectrum of  $\text{Eu}^{3+}$  in KCl-MES buffer with various equivalents of  $\text{HSO}_4^-$ .

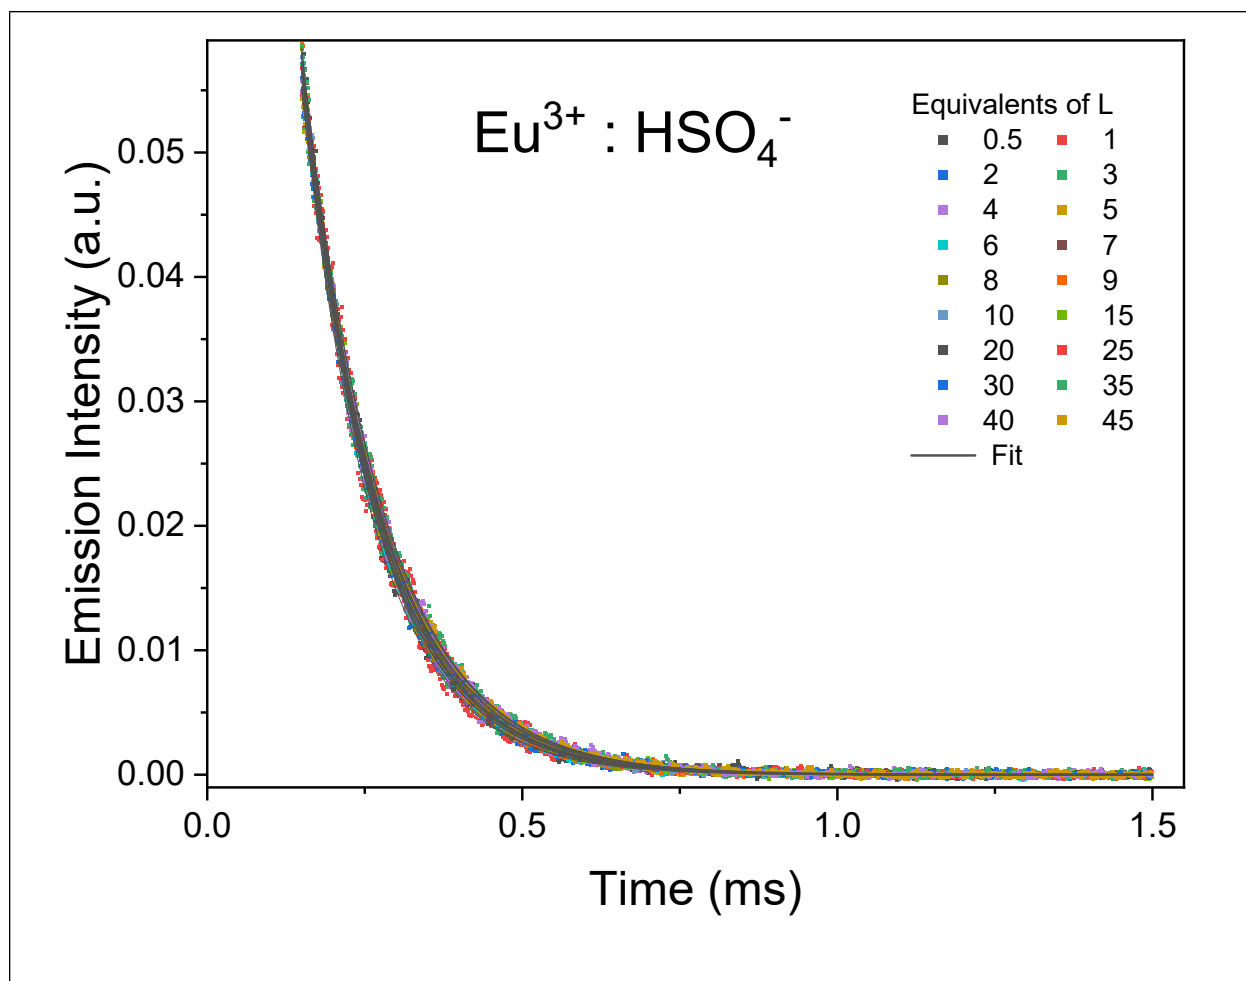

**Figure S27.** Time-resolved emission decay trace of  $\text{Eu}^{3+}$  in KCl-MES buffer with various equivalents of  $\text{HSO}_4^-$ . The decay traces has been fit with a mono-exponential decay function.”

**Table S4.** Fitting parameters for emission decay traces of  $\text{Eu}^{3+} : \text{HSO}_4^-$ .

| Trace | $y = A1 \cdot \exp(-x/t1) + y0$ |            |         |            |           |            |
|-------|---------------------------------|------------|---------|------------|-----------|------------|
|       | y0                              | y0 (Error) | A1      | A1 (Error) | t1        | t1 (error) |
| 0.5   | 4.16742E-5                      | 1.52875E-5 | 0.22135 | 9.20721E-4 | 112.58962 | 0.26137    |
| 1     | -3.02104E-5                     | 1.58451E-5 | 0.20649 | 9.23353E-4 | 113.97595 | 0.28716    |
| 2     | -6.61678E-6                     | 1.52992E-5 | 0.20176 | 8.2033E-4  | 117.5884  | 0.27599    |
| 3     | 5.18042E-5                      | 1.38527E-5 | 0.19557 | 7.2757E-4  | 118.51125 | 0.25606    |
| 4     | -6.08107E-6                     | 1.5141E-5  | 0.20584 | 8.18002E-4 | 117.25395 | 0.26839    |
| 5     | 8.01727E-6                      | 1.36623E-5 | 0.20398 | 7.08904E-4 | 119.05862 | 0.24117    |
| 6     | 1.81114E-6                      | 1.4894E-5  | 0.19907 | 7.6506E-4  | 119.51556 | 0.26851    |
| 7     | -2.84748E-5                     | 1.46396E-5 | 0.19997 | 7.17759E-4 | 121.65964 | 0.25883    |
| 8     | 9.10263E-6                      | 1.5079E-5  | 0.19651 | 7.47143E-4 | 121.16951 | 0.27221    |
| 9     | -6.49833E-5                     | 1.49409E-5 | 0.19647 | 7.18089E-4 | 122.59304 | 0.26716    |
| 10    | -1.04418E-5                     | 1.74335E-5 | 0.19576 | 8.63282E-4 | 121.1975  | 0.31586    |
| 15    | -4.26008E-5                     | 1.45869E-5 | 0.19171 | 6.69984E-4 | 124.75691 | 0.26352    |
| 20    | -1.31277E-6                     | 1.75074E-5 | 0.19032 | 8.0432E-4  | 124.74516 | 0.3186     |
| 25    | -4.13821E-5                     | 1.61947E-5 | 0.18553 | 6.82322E-4 | 129.02613 | 0.29437    |
| 30    | 5.71128E-5                      | 1.53287E-5 | 0.17998 | 6.78137E-4 | 126.58759 | 0.29154    |
| 35    | -1.63635E-5                     | 1.52164E-5 | 0.18578 | 6.46478E-4 | 128.60447 | 0.27691    |
| 40    | -3.06379E-5                     | 1.47278E-5 | 0.17816 | 6.10907E-4 | 129.81998 | 0.27746    |
| 45    | -4.36307E-6                     | 1.51367E-5 | 0.1769  | 6.42917E-4 | 128.61815 | 0.28927    |



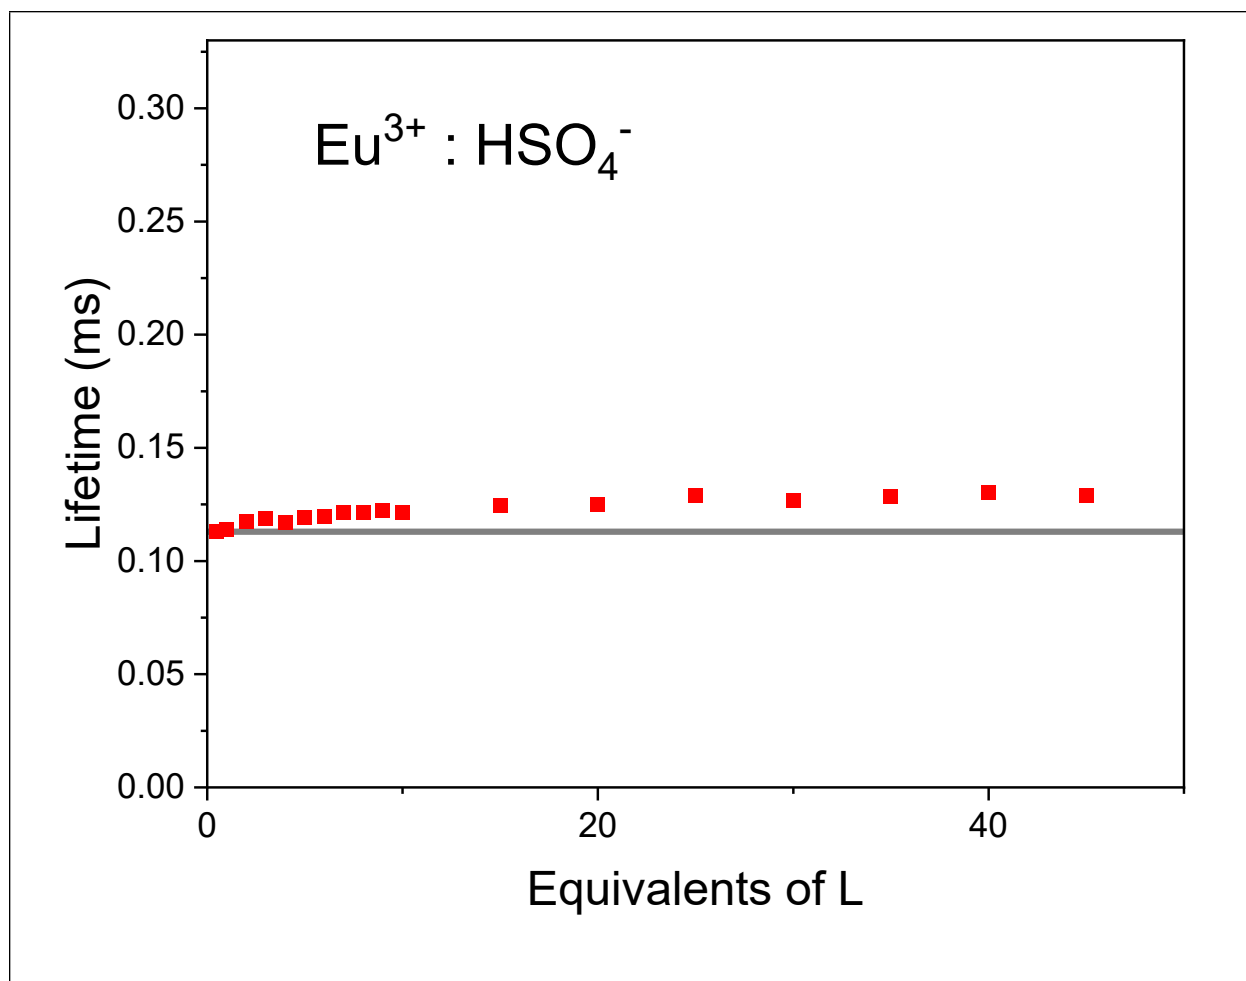

**Figure S28.** Excited state lifetime of  $\text{Eu}^{3+}$  in KCl-MES buffer as a function of equivalents of  $\text{HSO}_4^-$ . The lifetimes has been determined from a mono-exponential decay function. The grey bar indicates the excited state lifetime of  $\text{Eu}^{3+}$  in water.

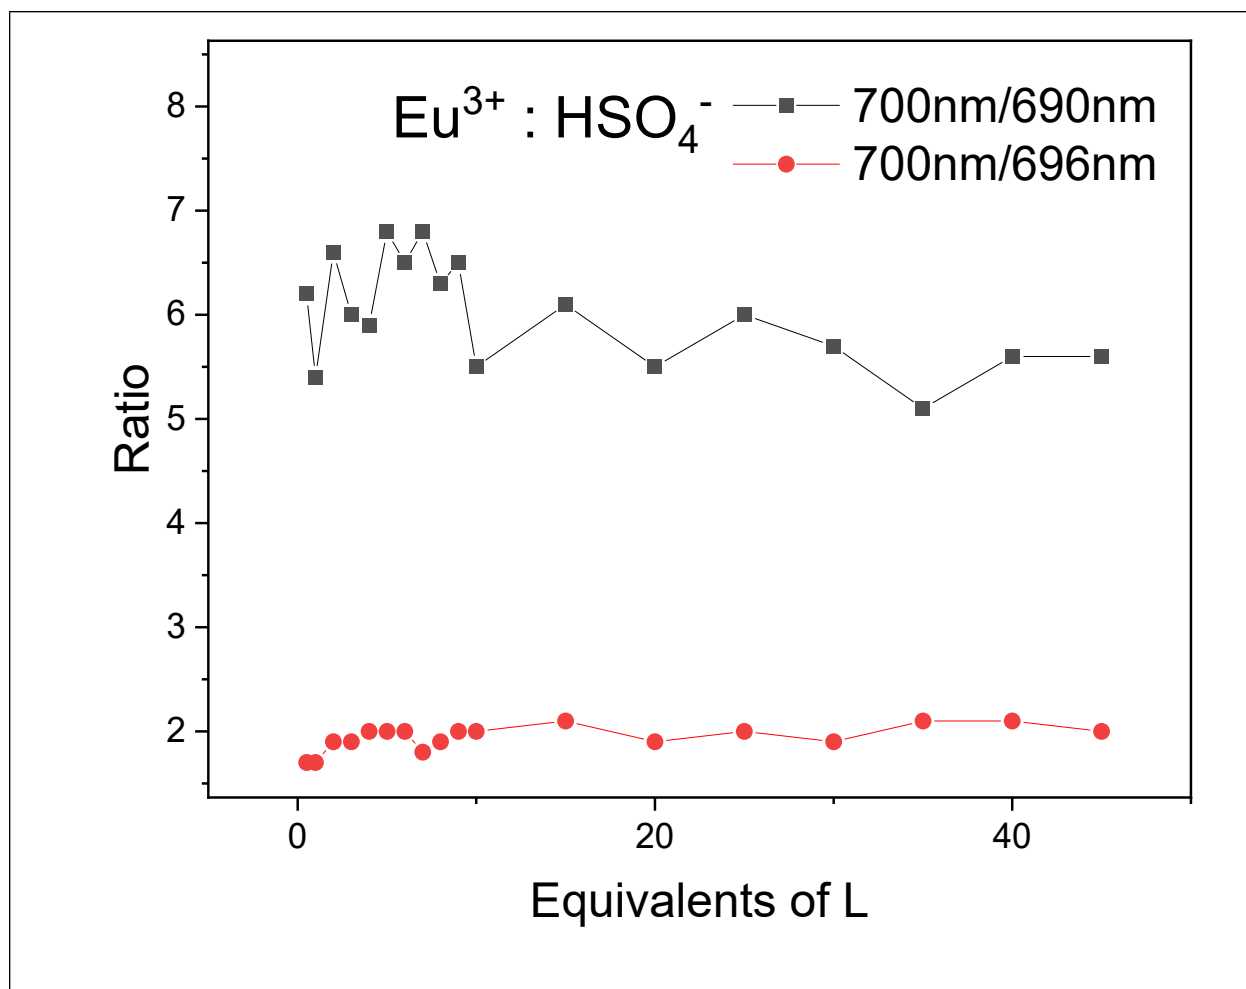

**Figure S29.** Ratios of emission intensity of Eu<sup>3+</sup> in KCl-MES buffer as a function of equivalents of HSO<sub>4</sub><sup>-</sup>. The ratios give an indication of the changes in LF-splitting (see main text).

$\text{Eu}^{3+} : \text{SO}_4^{2-}$

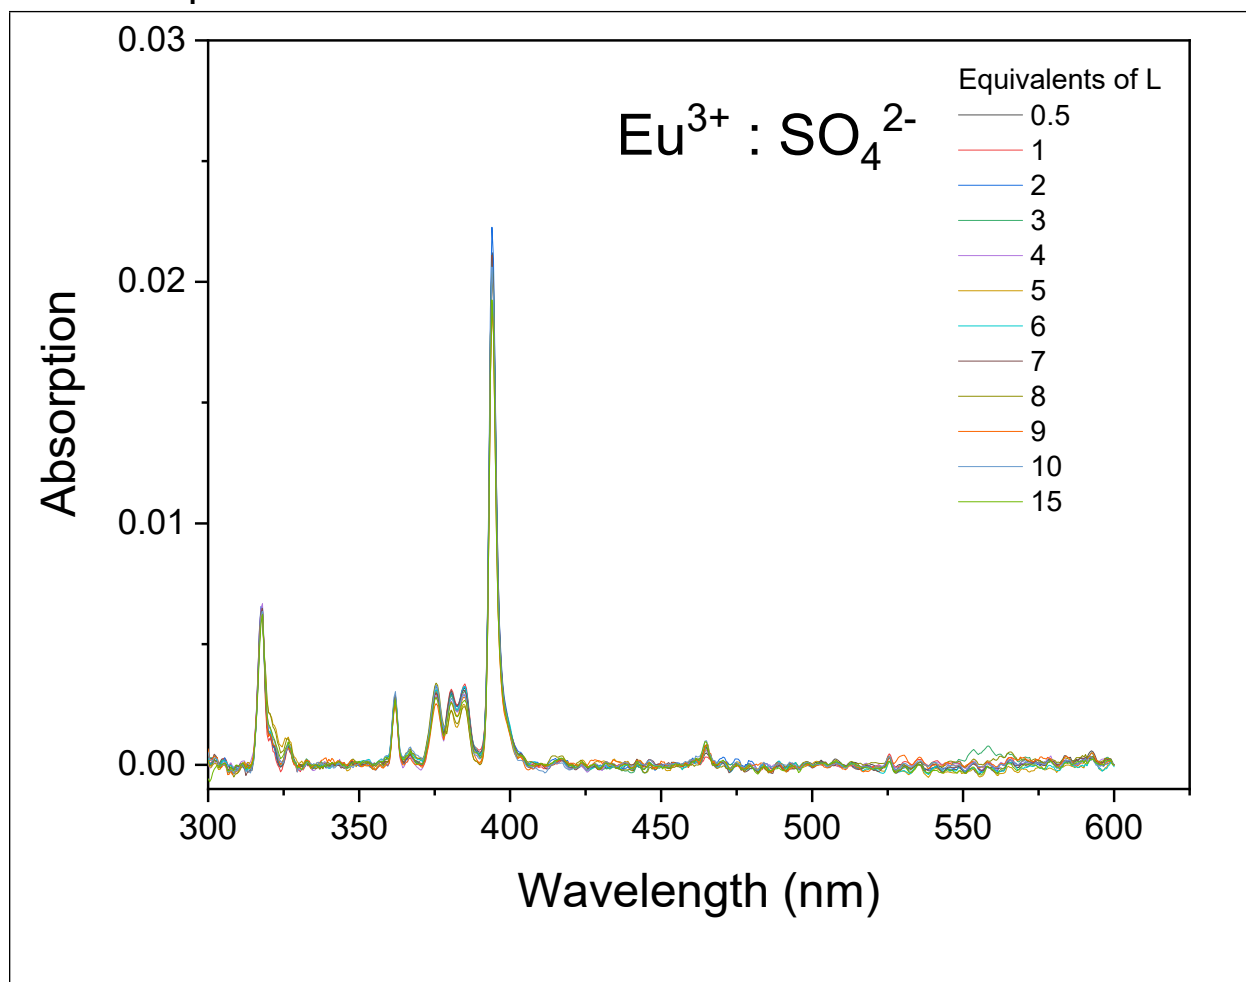

Figure S30. Absorption of  $\text{Eu}^{3+}$  in KCl-MES buffer with various equivalents of  $\text{SO}_4^{2-}$ .

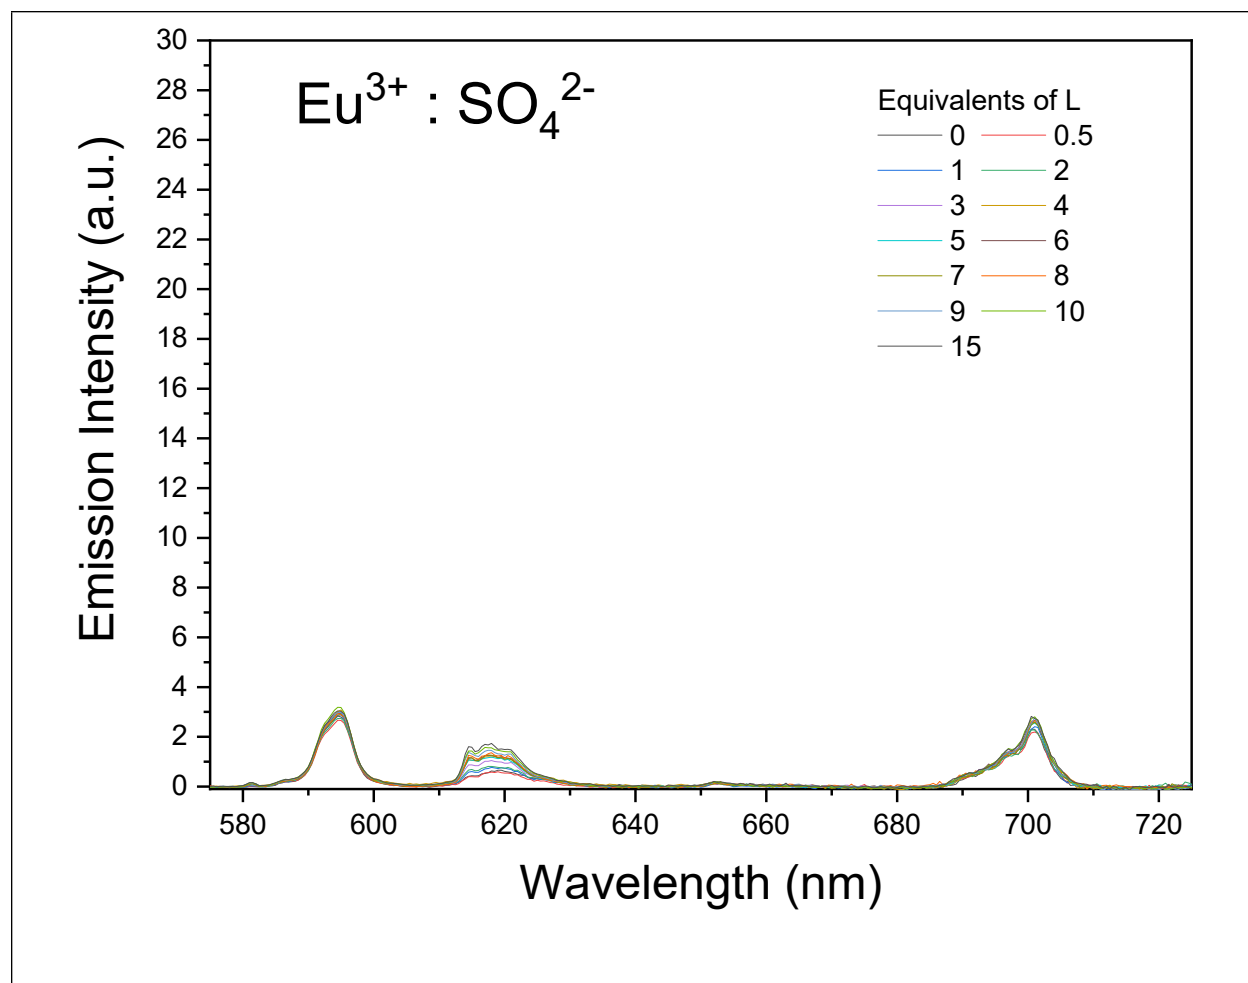

**Figure S31.** Emission spectrum of  $\text{Eu}^{3+}$  in KCl-MES buffer with various equivalents of  $\text{SO}_4^{2-}$ .

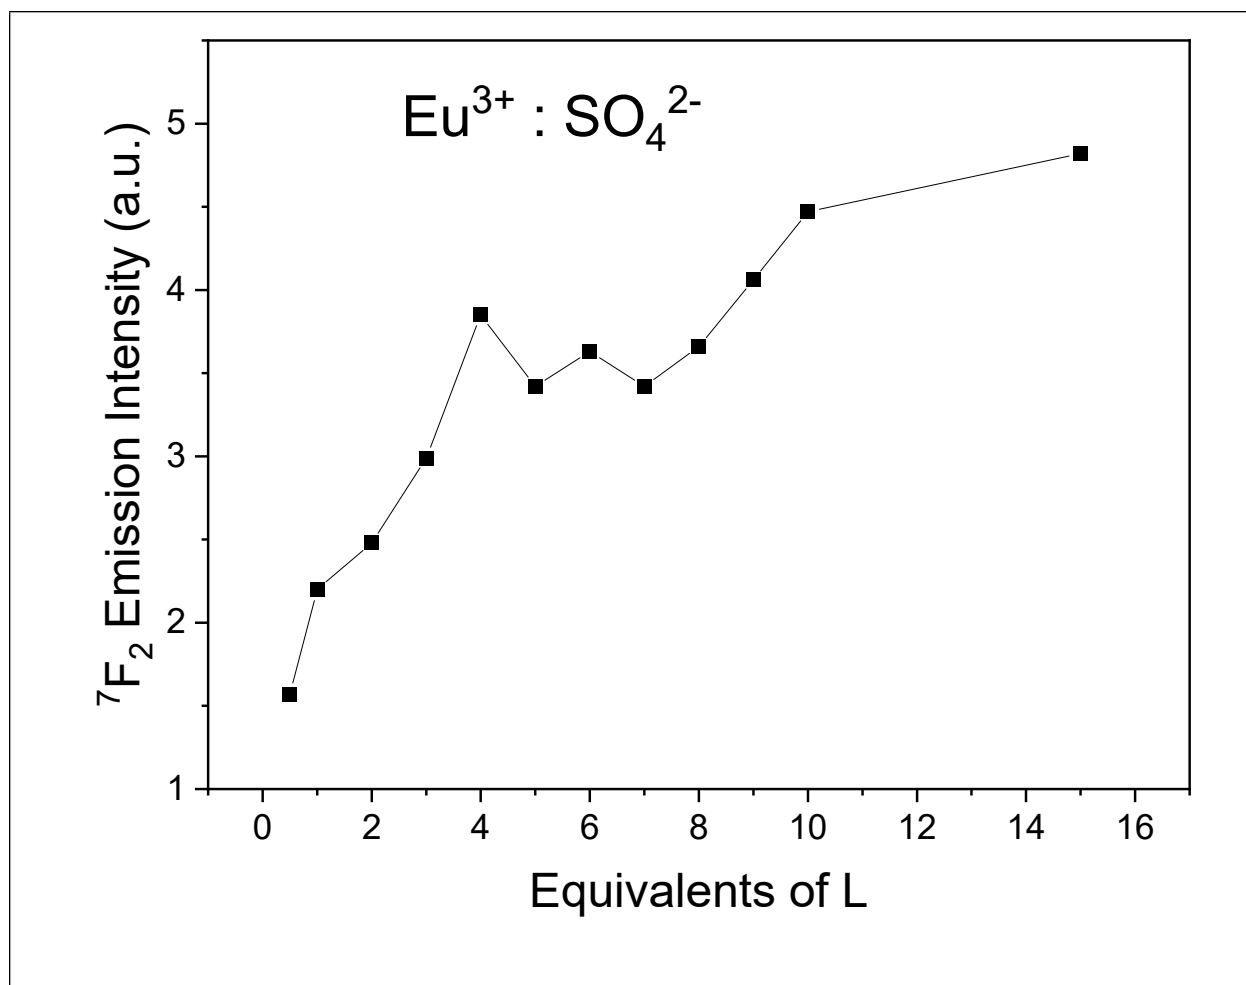

**Figure S32.** Emission intensity of the  ${}^5D_0 \rightarrow {}^7F_2$  emission band of  $Eu^{3+}$  in KCl-MES buffer as a function of equivalents of  $SO_4^{2-}$ . The emission intensity was taken as the integration over the full  ${}^7F_2$  band (606-637 nm).

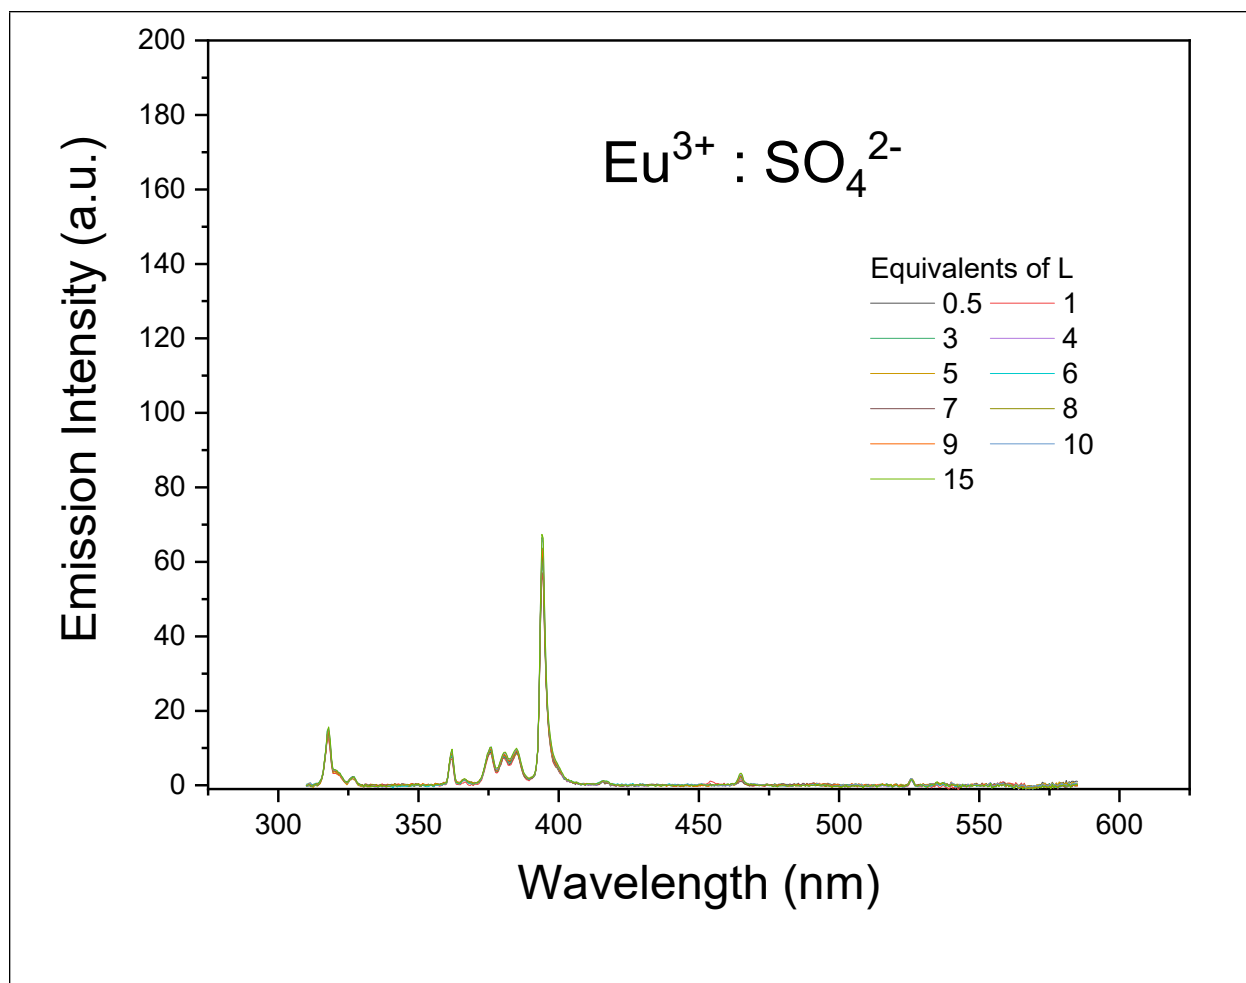

Figure S33. Excitation spectrum of  $\text{Eu}^{3+}$  in KCl-MES buffer with various equivalents of  $\text{SO}_4^{2-}$ .

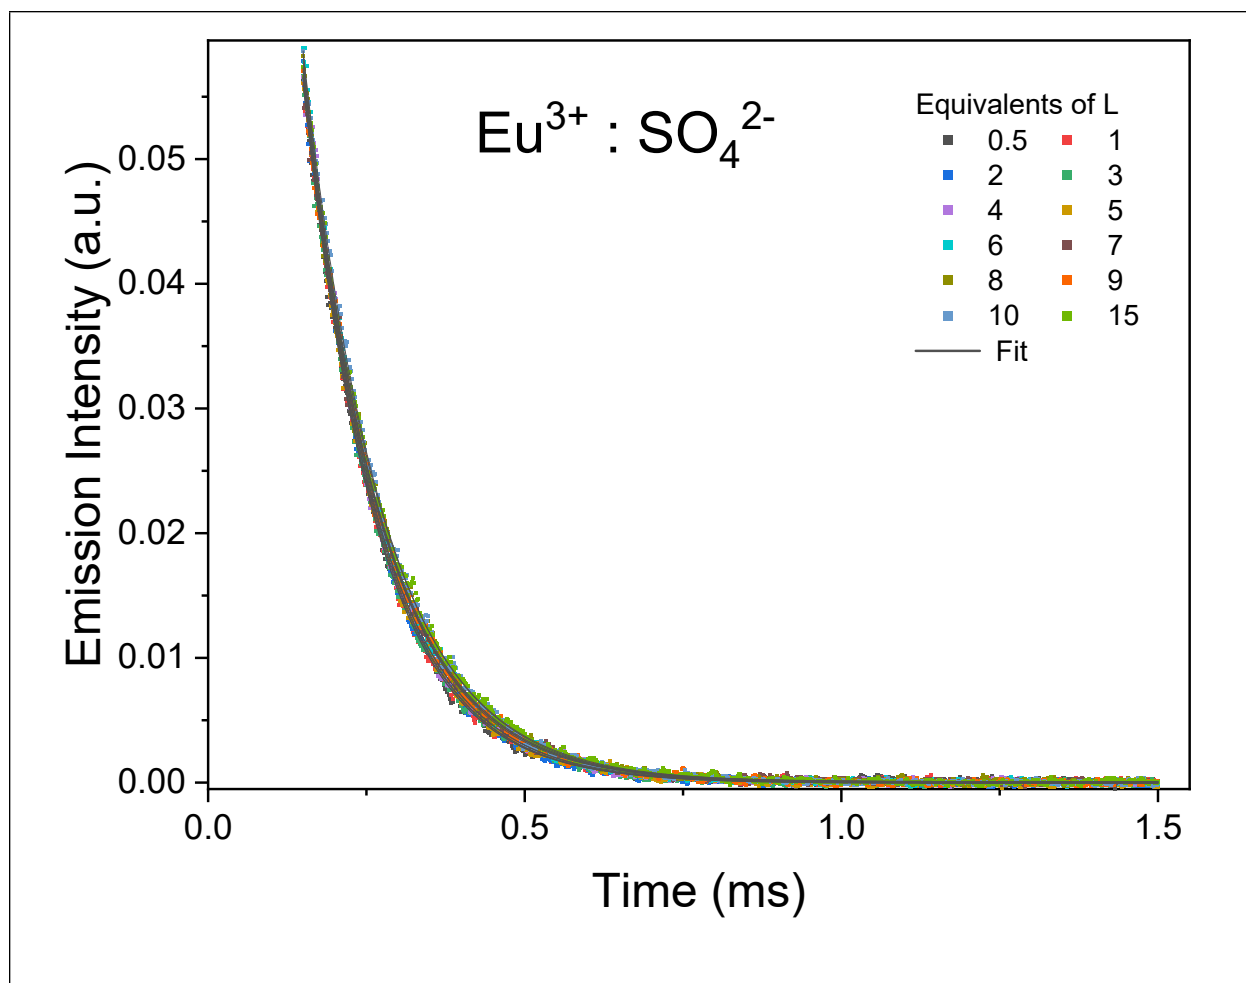

**Figure S34.** Time-resolved emission decay trace of  $\text{Eu}^{3+}$  in KCl-MES buffer with various equivalents of  $\text{SO}_4^{2-}$ . The decay traces has been fit with a mono-exponential decay function.

**Table S5.** Fitting parameters for emission decay traces of  $\text{Eu}^{3+} : \text{SO}_4^{2-}$ .

| Trace | $y = A1 \cdot \exp(-x/t1) + y0$ |            |         |            |           |            |
|-------|---------------------------------|------------|---------|------------|-----------|------------|
|       | y0                              | y0 (Error) | A1      | A1 (Error) | t1        | t1 (error) |
| 0.5   | 3.36803E-5                      | 1.39663E-5 | 0.20606 | 7.87431E-4 | 115.38945 | 0.25084    |
| 1     | 3.71315E-5                      | 1.15749E-5 | 0.20894 | 6.59601E-4 | 114.92998 | 0.20575    |
| 2     | -6.00762E-5                     | 1.52234E-5 | 0.20491 | 8.19835E-4 | 117.39491 | 0.27079    |
| 3     | -1.8281E-5                      | 1.44471E-5 | 0.20394 | 7.86875E-4 | 116.89578 | 0.25917    |
| 4     | 4.73685E-5                      | 1.75695E-5 | 0.20707 | 9.40844E-4 | 117.64589 | 0.30869    |
| 5     | -7.76755E-5                     | 1.53236E-5 | 0.19725 | 7.77901E-4 | 120.05309 | 0.27775    |
| 6     | 5.96644E-5                      | 1.44662E-5 | 0.20304 | 7.29269E-4 | 120.37266 | 0.25415    |
| 7     | 4.39874E-5                      | 1.49441E-5 | 0.18759 | 6.9711E-4  | 124.0117  | 0.27724    |
| 8     | 7.23188E-5                      | 1.6183E-5  | 0.19153 | 7.54448E-4 | 124.04044 | 0.29399    |
| 9     | -3.73924E-5                     | 1.50823E-5 | 0.18883 | 6.96525E-4 | 124.49403 | 0.27709    |
| 10    | -2.55921E-5                     | 1.53821E-5 | 0.19275 | 6.87136E-4 | 126.11003 | 0.274      |
| 15    | 2.64762E-5                      | 1.43277E-5 | 0.18561 | 6.20871E-4 | 127.61344 | 0.26257    |



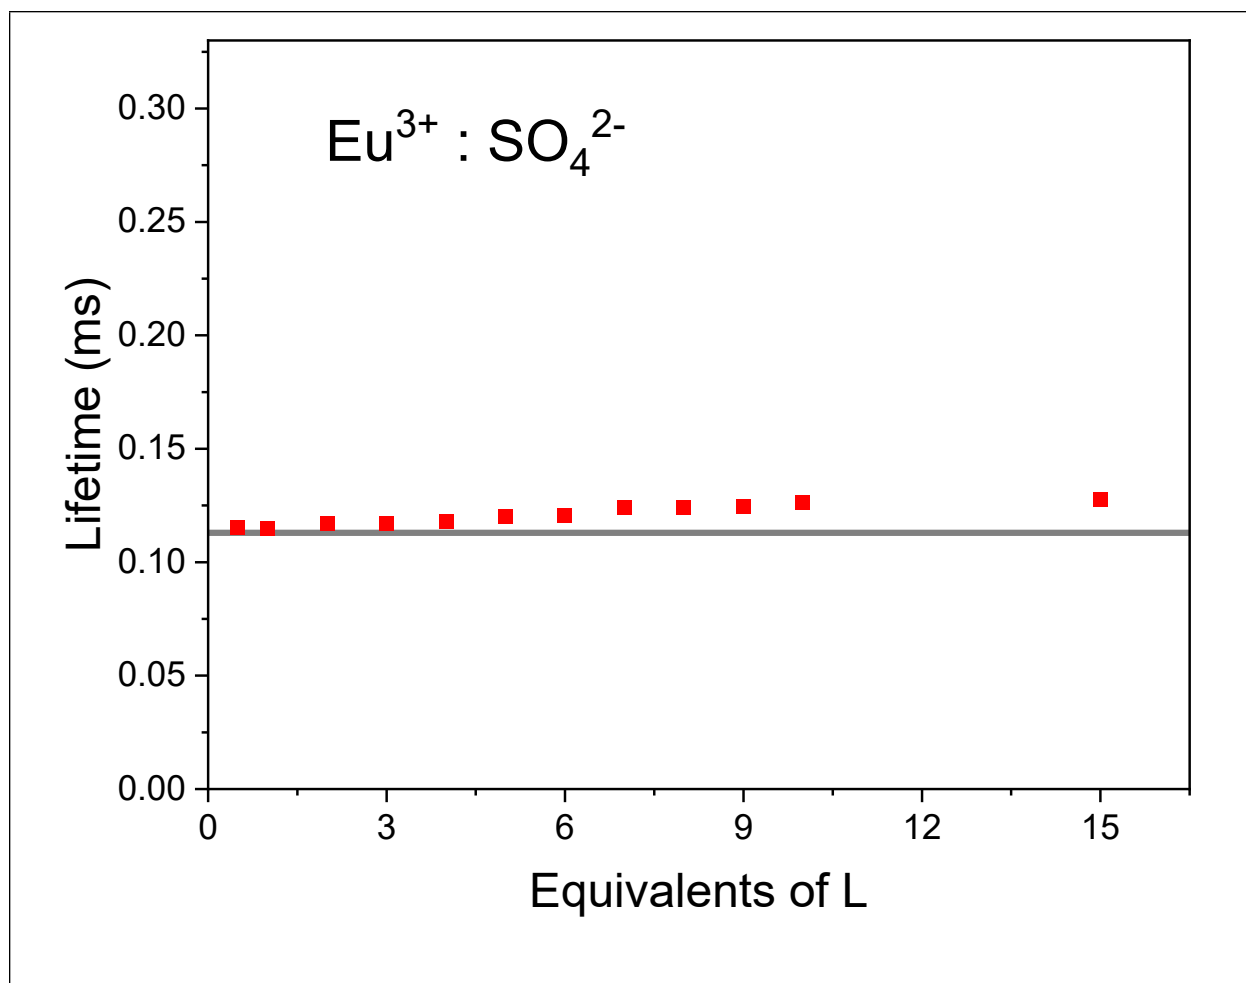

**Figure S35.** Excited state lifetime of  $\text{Eu}^{3+}$  in KCl-MES buffer as a function of equivalents of  $\text{SO}_4^{2-}$ . The lifetimes has been determined from a mono-exponential decay function. The grey bar indicates the excited state lifetime of  $\text{Eu}^{3+}$  in water.

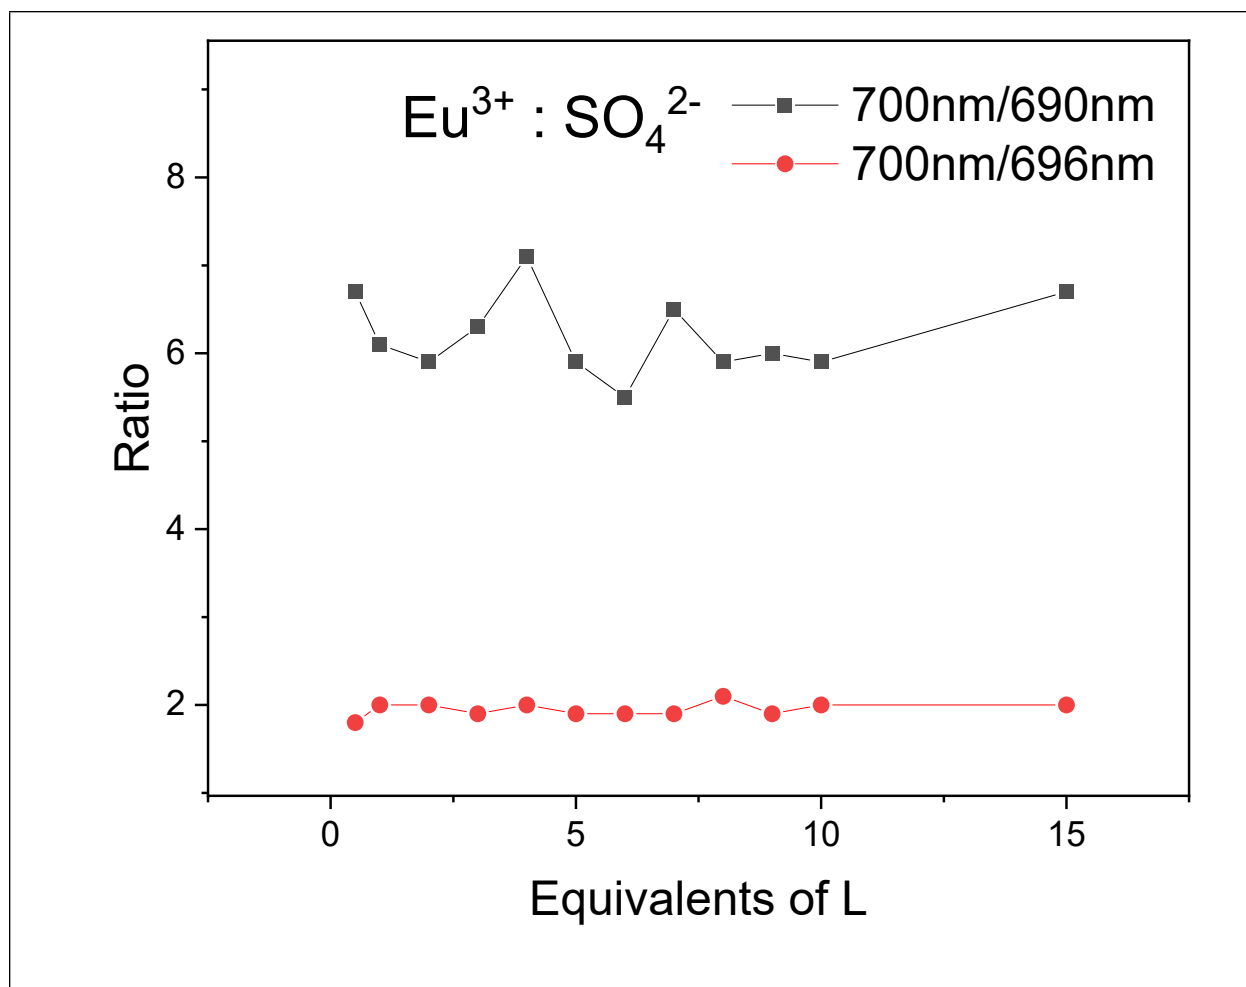

**Figure S36.** Ratios of emission intensity of  $\text{Eu}^{3+}$  in KCl-MES buffer as a function of equivalents of  $\text{SO}_4^{2-}$ . The ratios give an indication of the changes in LF-splitting (see main text).

$\text{Eu}^{3+} : \text{Cl}^-$

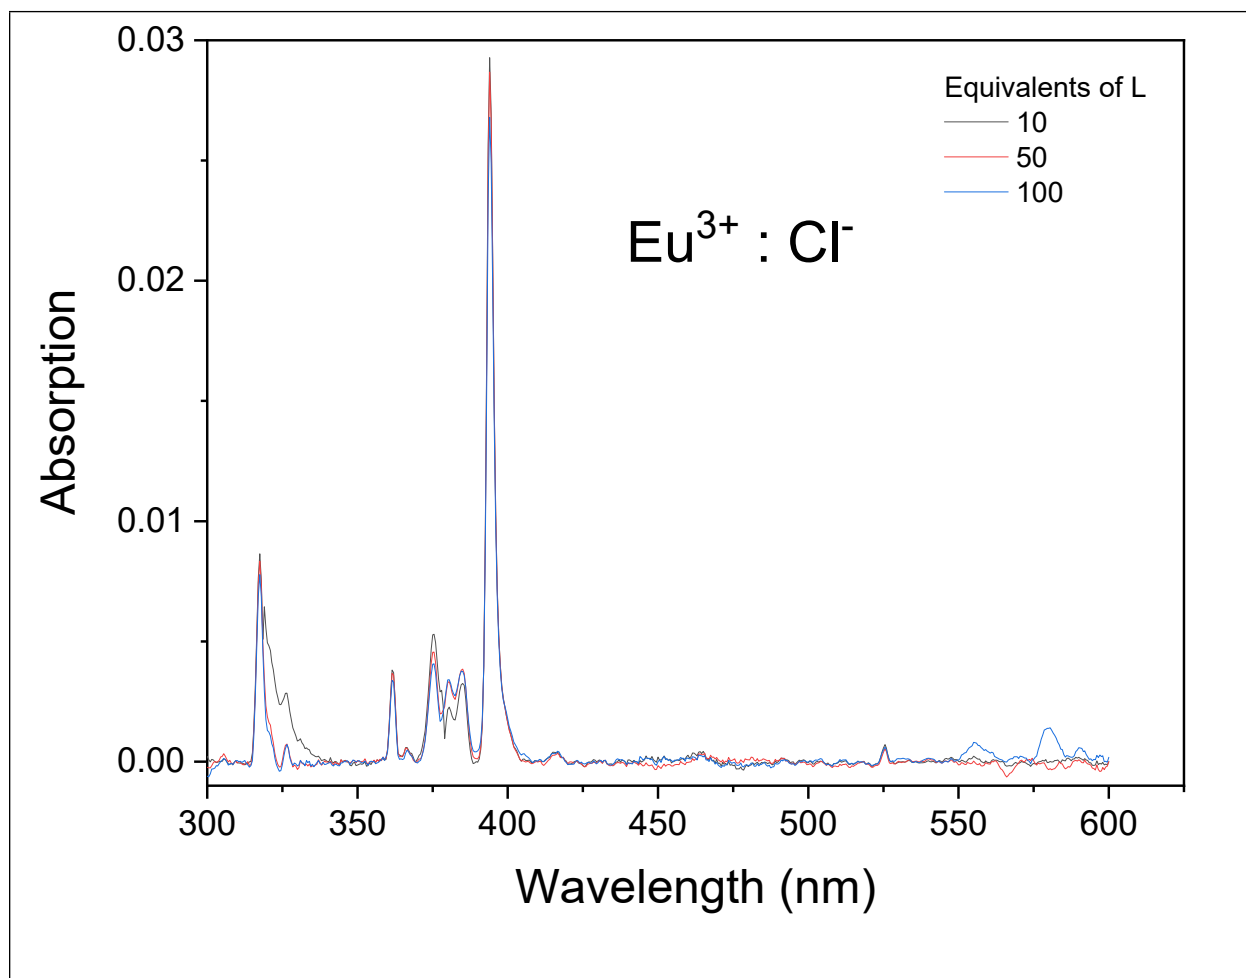

Figure S37. Absorption of  $\text{Eu}^{3+}$  in KCl-MES buffer with various equivalents of  $\text{Cl}^-$ .

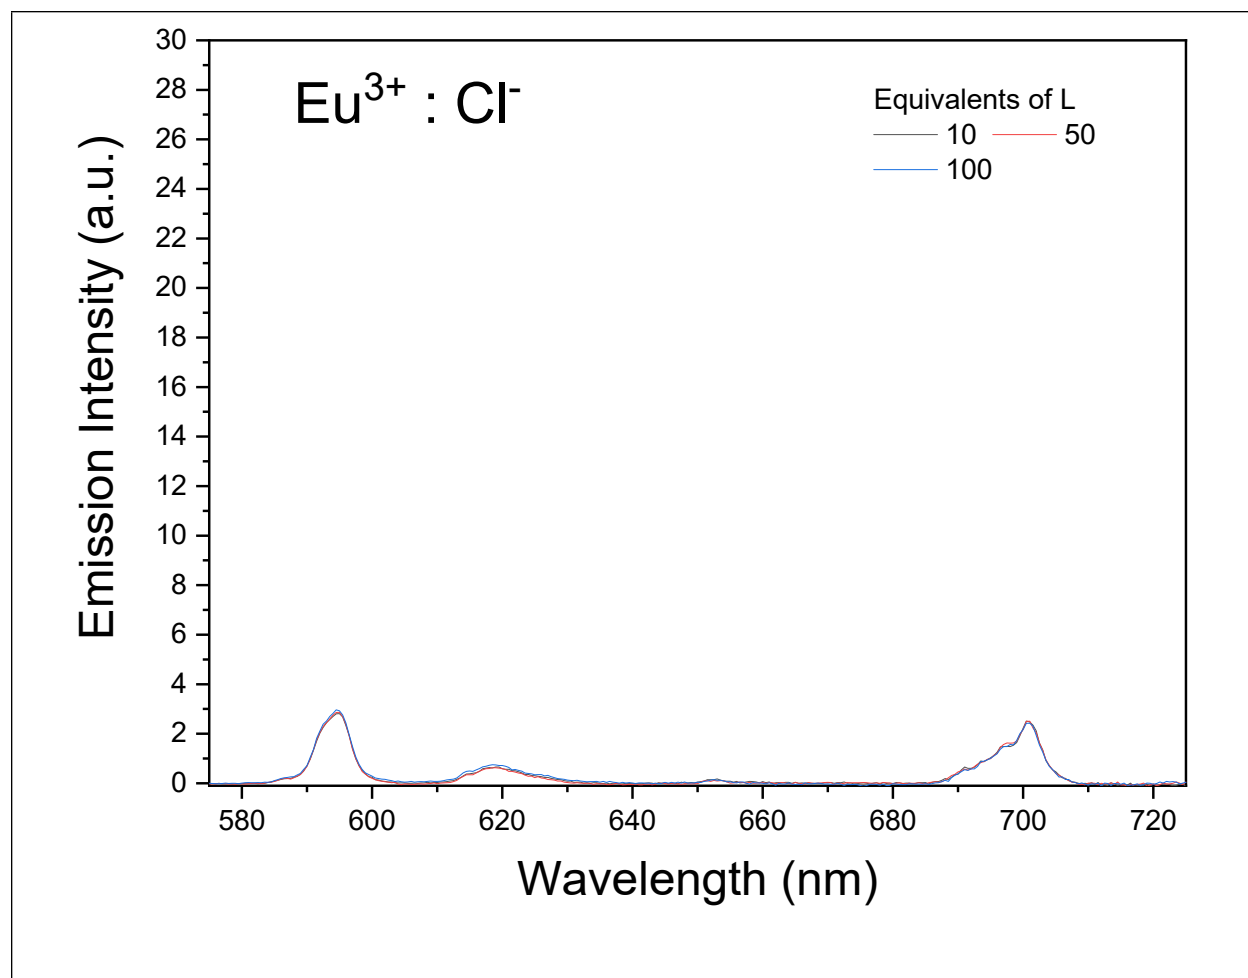

Figure S38. Emission spectrum of  $\text{Eu}^{3+}$  in KCl-MES buffer with various equivalents of  $\text{Cl}^-$ .

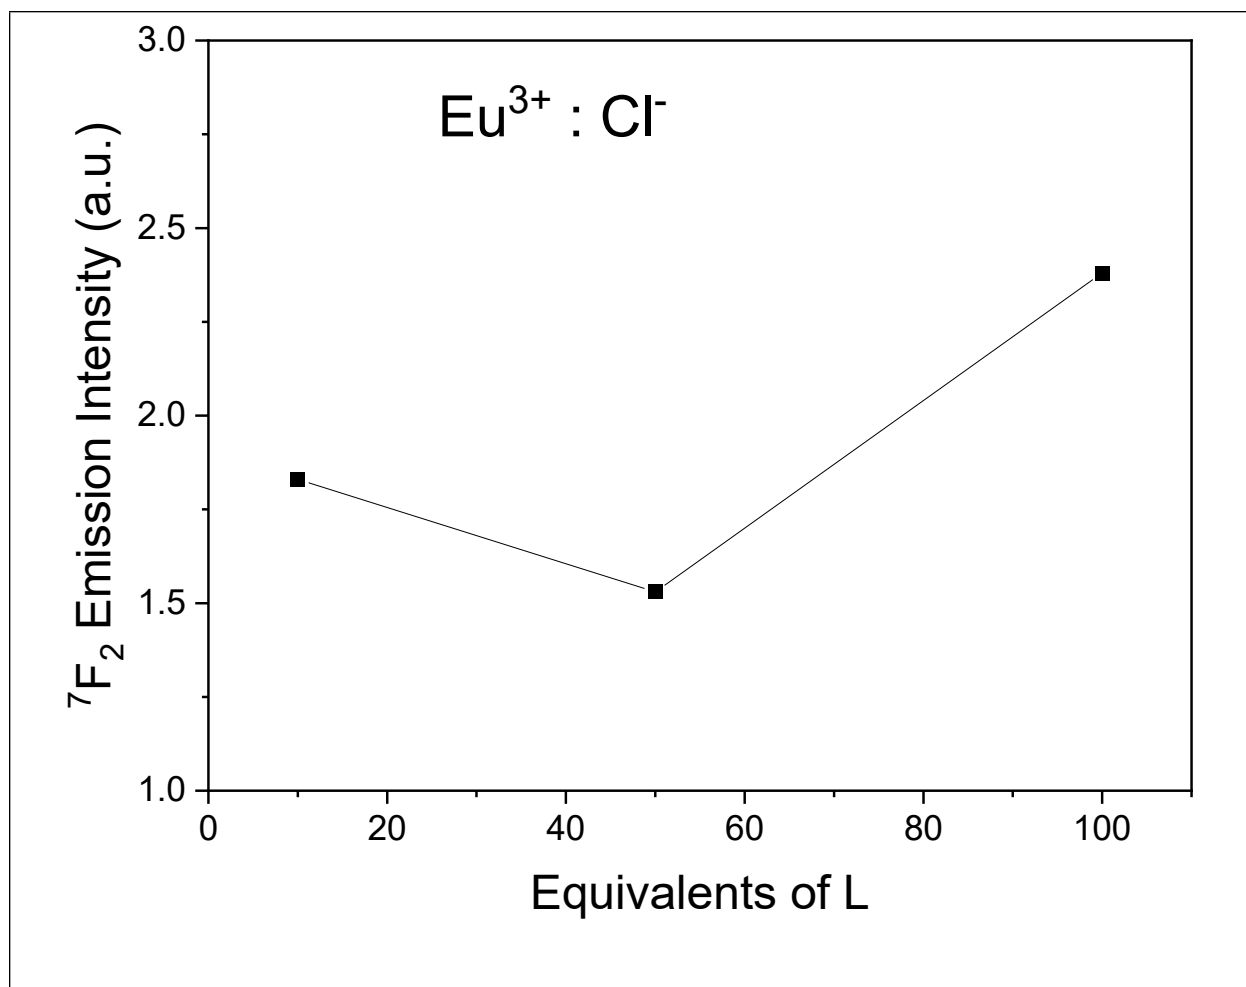

**Figure S39.** Emission intensity of the  $^5D_0 \rightarrow ^7F_2$  emission band of  $\text{Eu}^{3+}$  in KCl-MES buffer as a function of equivalents of  $\text{AcO}^-$ . The emission intensity was taken as the integration over the full  $^7F_2$  band (606-637 nm).

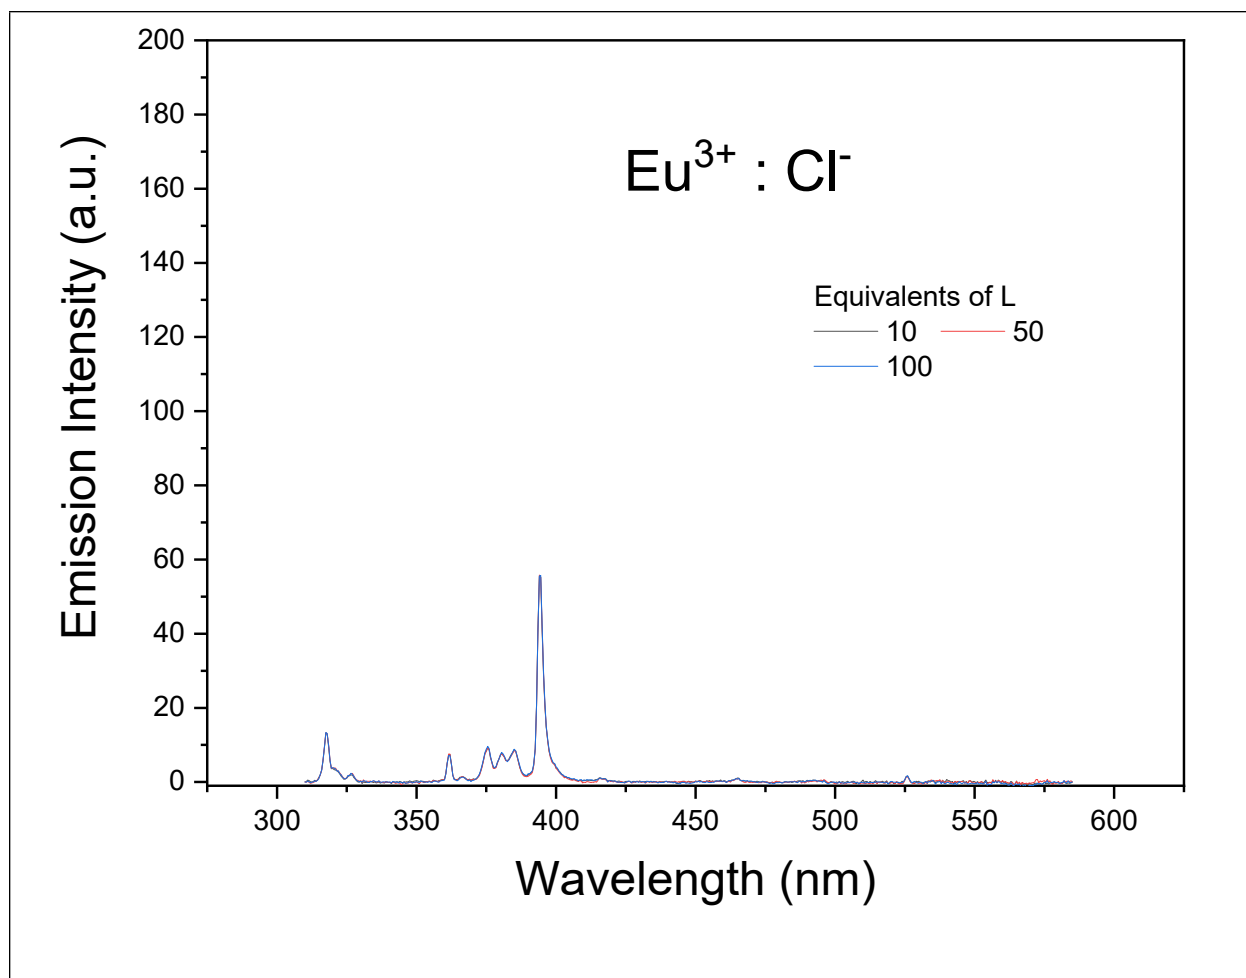

Figure S40. Excitation spectrum of Eu<sup>3+</sup> in KCl-MES buffer with various equivalents of Cl<sup>-</sup>.

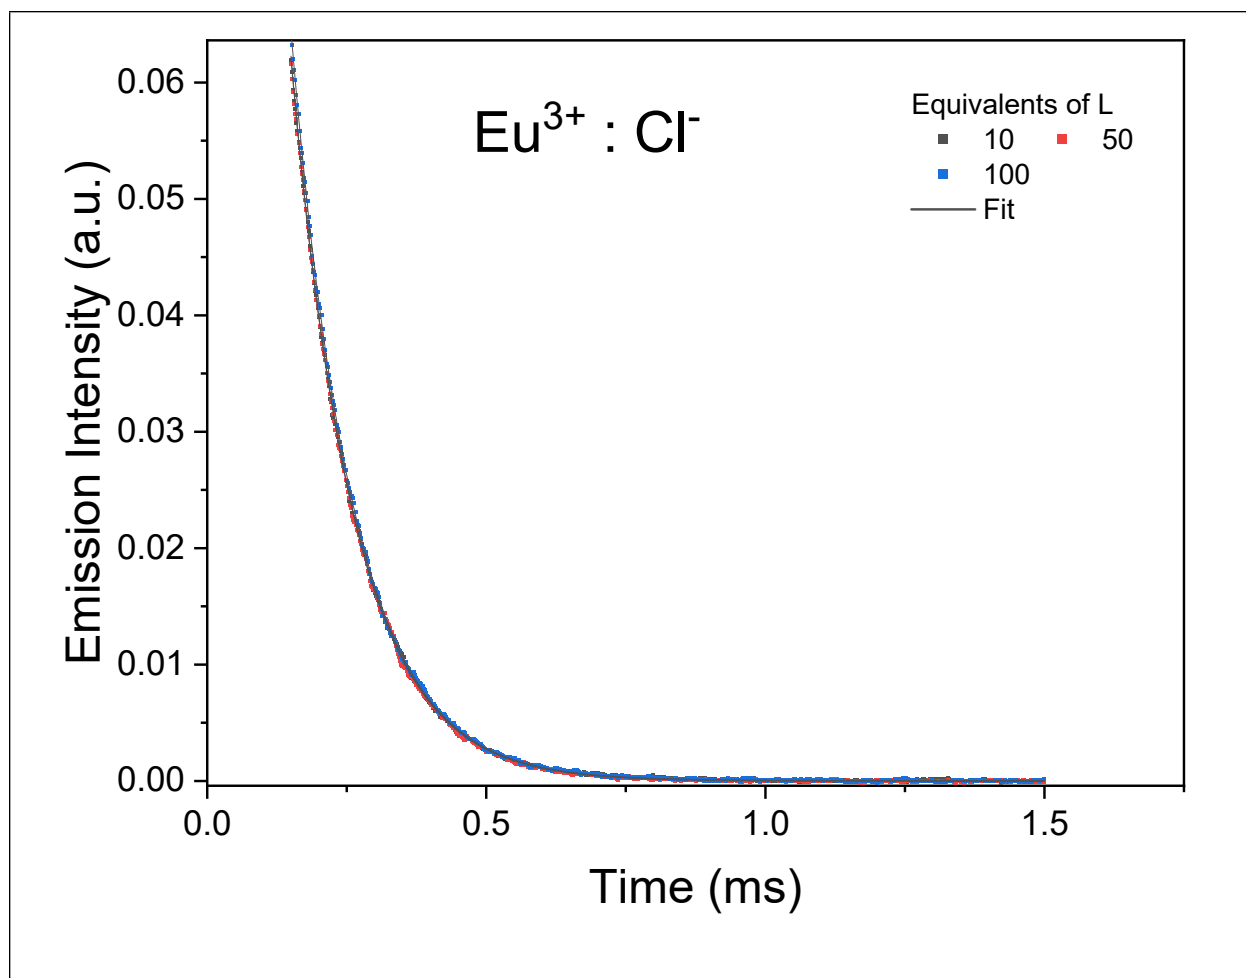

**Figure S41.** Time-resolved emission decay trace of Eu<sup>3+</sup> in KCl-MES buffer with various equivalents of Cl<sup>-</sup>. The decay traces has been fit with a mono-exponential decay function.

**Table S6.** Fitting parameters for emission decay traces of  $\text{Eu}^{3+} : \text{Cl}^-$ .

| Trace | $y = A1 \cdot \exp(-x/t1) + y0$ |            |         |            |           |            |
|-------|---------------------------------|------------|---------|------------|-----------|------------|
|       | y0                              | y0 (Error) | A1      | A1 (Error) | t1        | t1 (error) |
| 10    | 1.82153E-5                      | 7.0639E-6  | 0.23636 | 4.27105E-4 | 112.42685 | 0.11325    |
| 50    | -3.51845E-5                     | 6.81515E-6 | 0.23658 | 4.148E-4   | 112.15225 | 0.10941    |
| 100   | 3.7568E-5                       | 6.77181E-6 | 0.24812 | 4.21087E-4 | 111.26971 | 0.10442    |



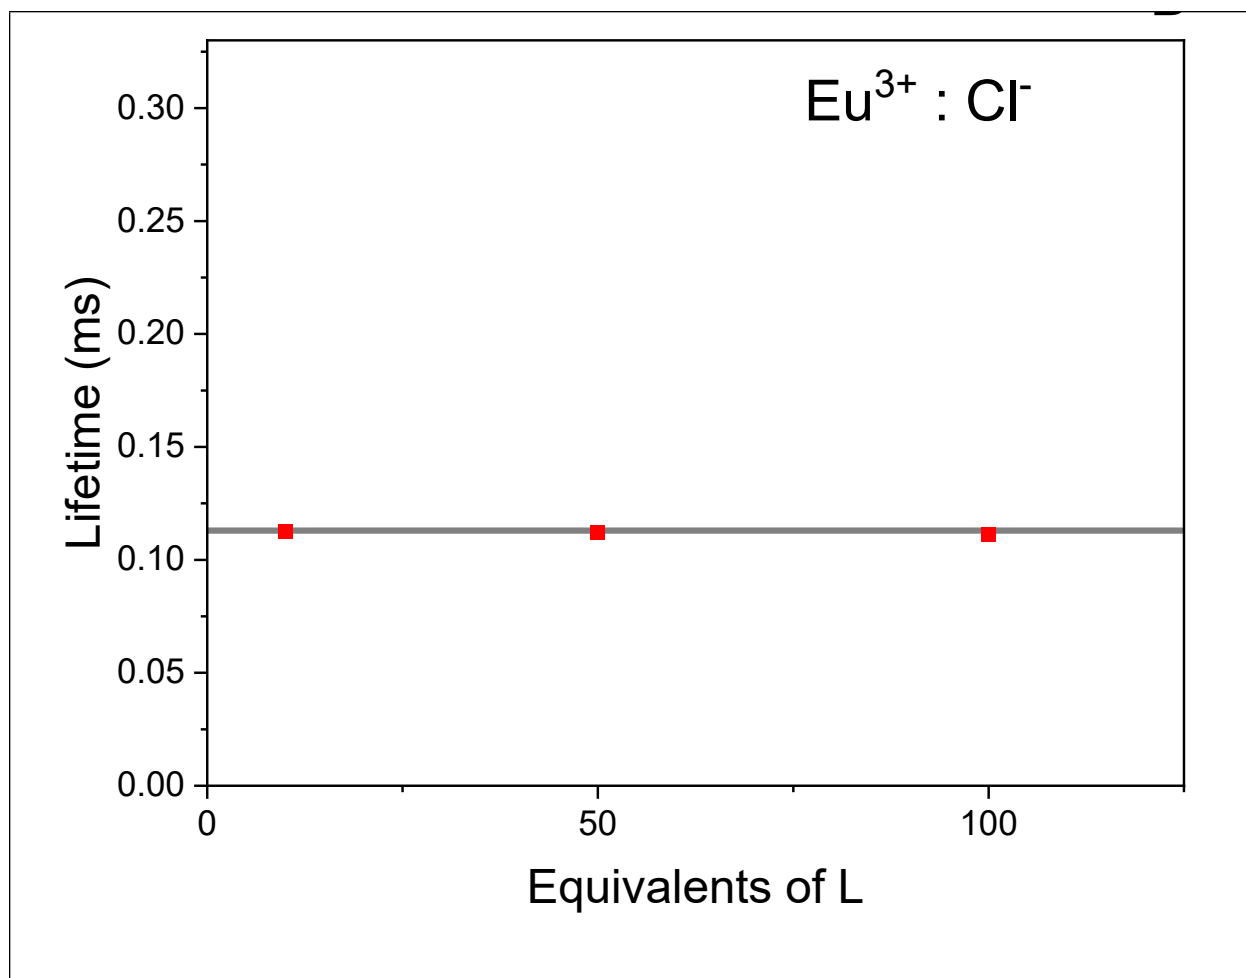

**Figure S42.** Excited state lifetime of Eu<sup>3+</sup> in KCl-MES buffer as a function of equivalents of Cl<sup>-</sup>. The lifetimes has been determined from a mono-exponential decay function. The grey bar indicates the excited state lifetime of Eu<sup>3+</sup> in water.

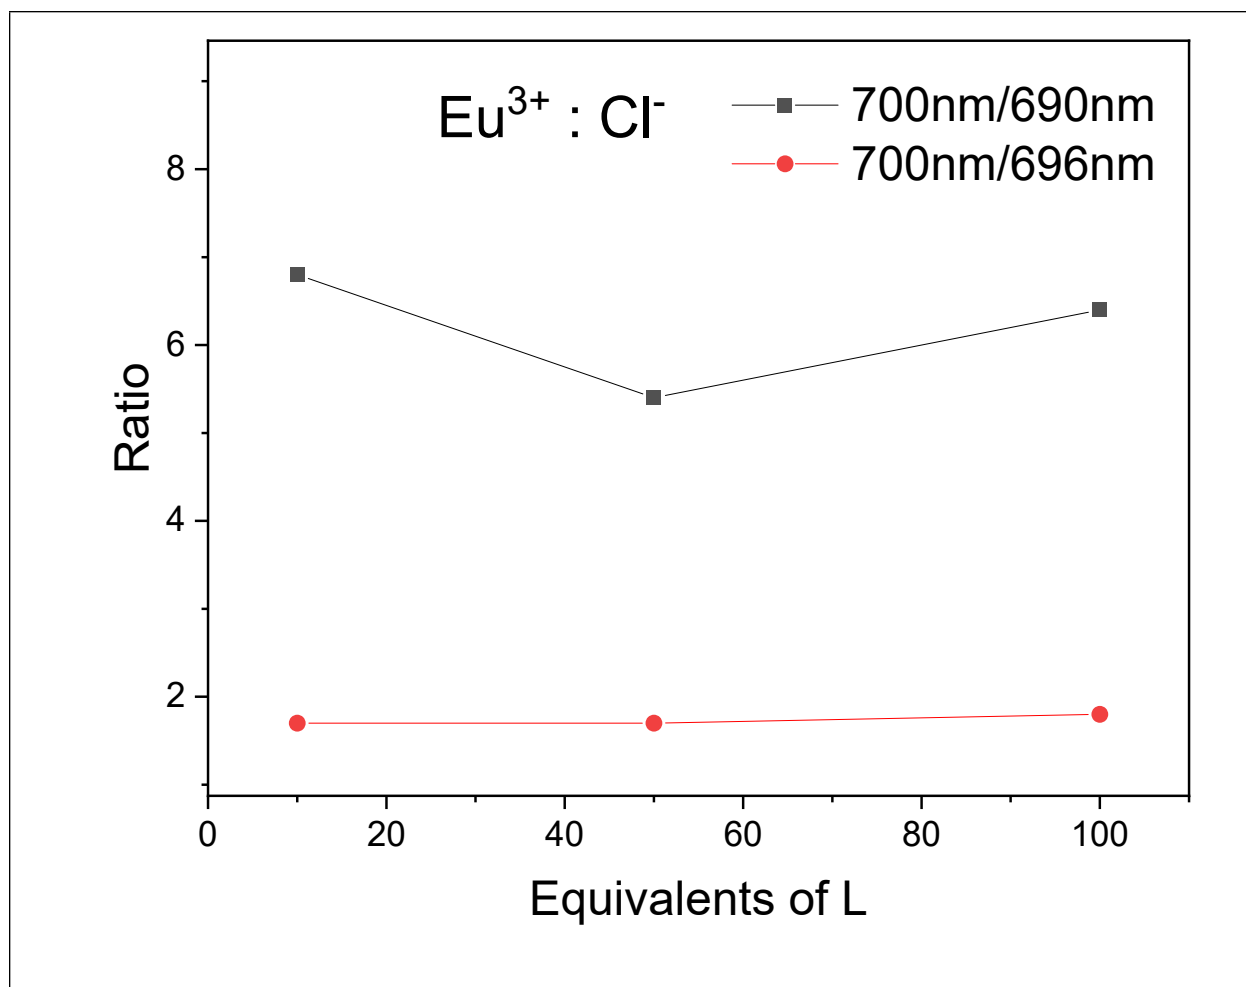

**Figure S43.** Ratios of emission intensity of  $\text{Eu}^{3+}$  in KCl-MES buffer as a function of equivalents of  $\text{Cl}^-$ . The ratios give an indication of the changes in LF-splitting (see main text).

$\text{Eu}^{3+} : \text{ClO}_4^-$

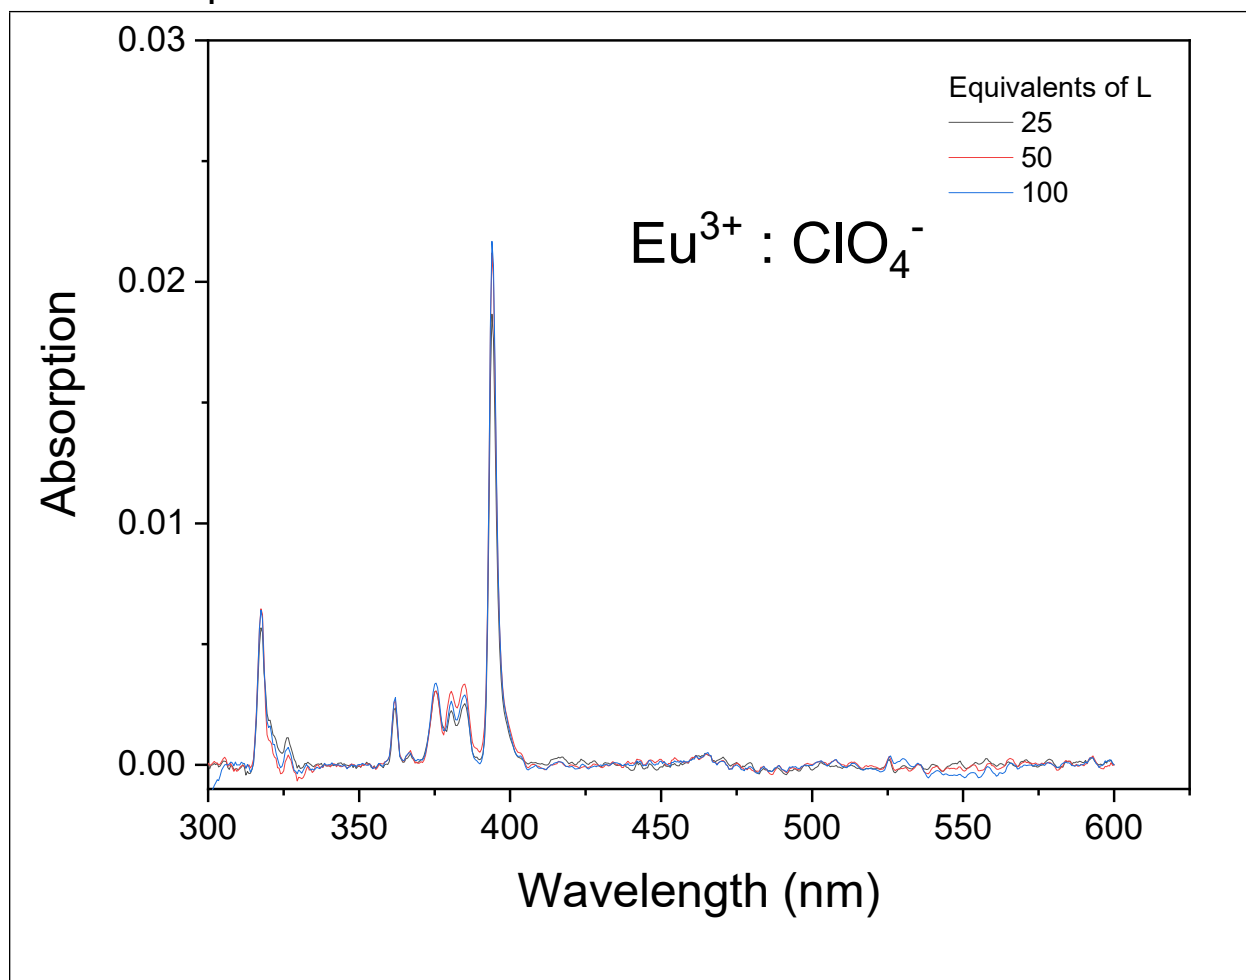

Figure S44. Absorption of  $\text{Eu}^{3+}$  in NaCl-MES buffer with various equivalents of  $\text{ClO}_4^-$ .

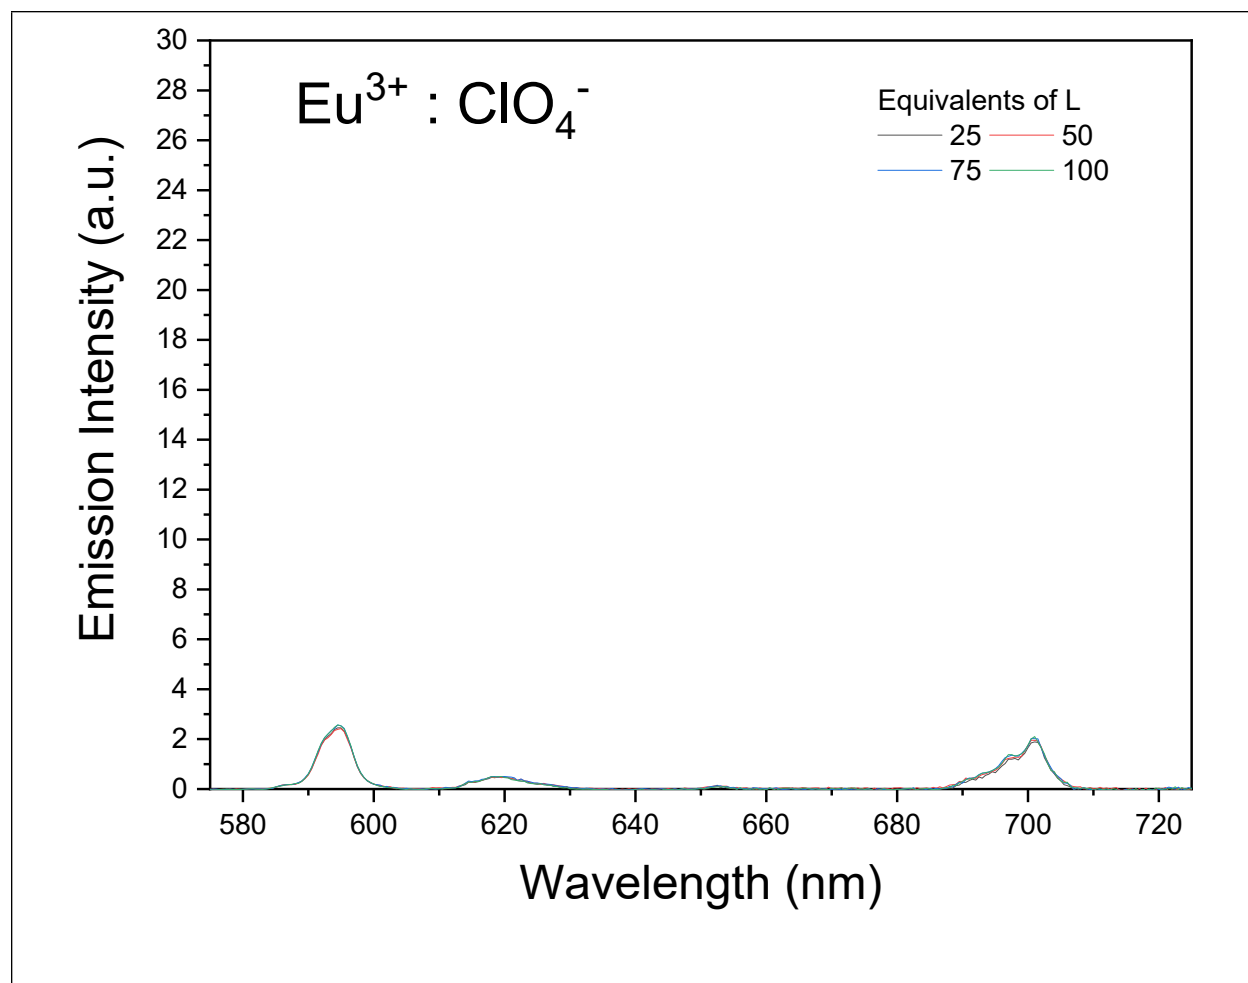

**Figure S45.** Emission spectrum of  $\text{Eu}^{3+}$  in NaCl-MES buffer with various equivalents of  $\text{ClO}_4^-$ .

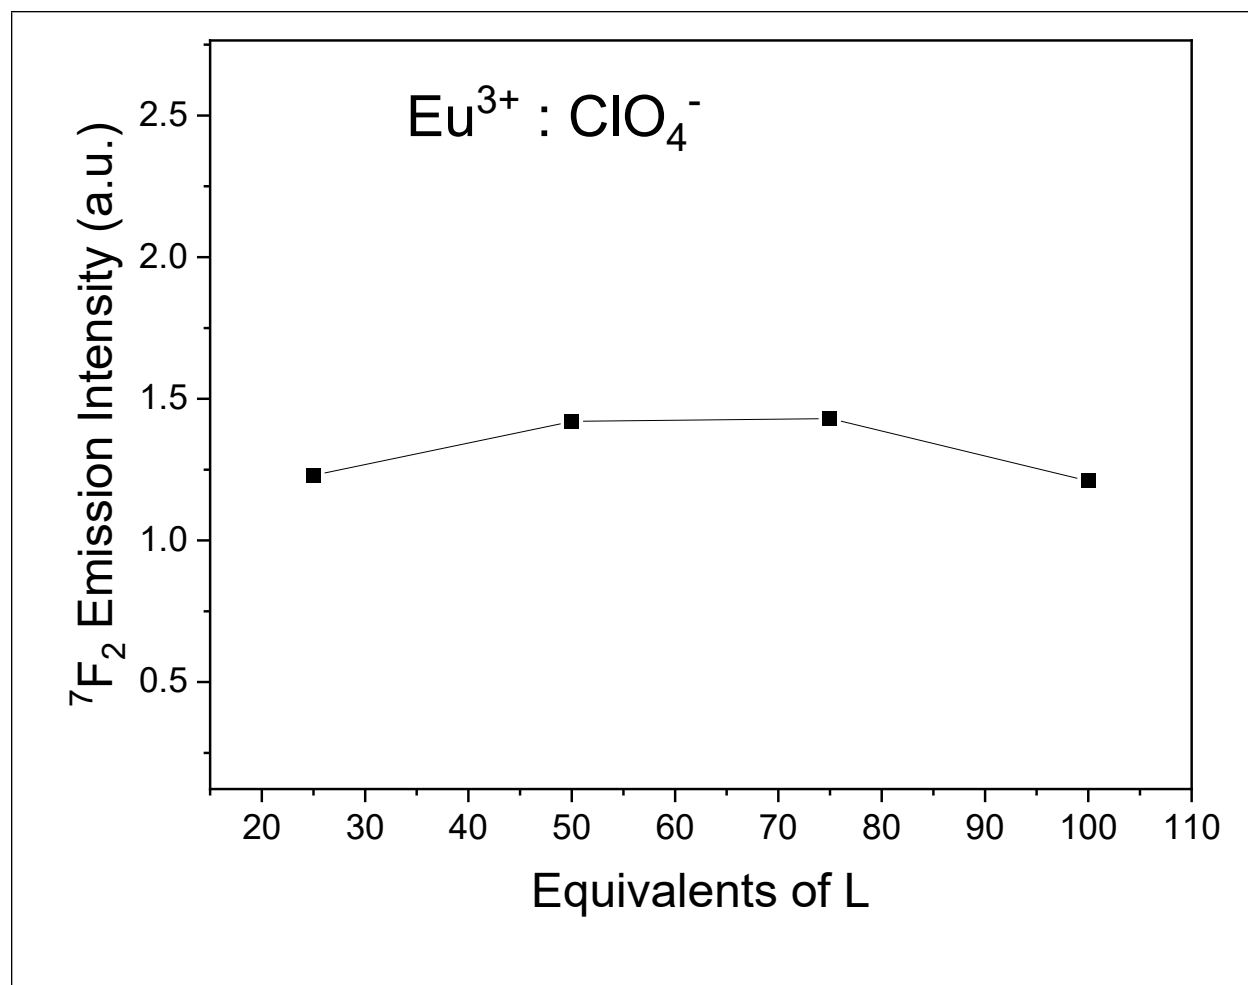

**Figure S46.** Emission intensity of the  ${}^5\text{D}_0 \rightarrow {}^7\text{F}_2$  emission band of  $\text{Eu}^{3+}$  in NaCl-MES buffer as a function of equivalents of  $\text{ClO}_4^-$ . The emission intensity was taken as the integration over the full  ${}^7\text{F}_2$  band (606-637 nm).

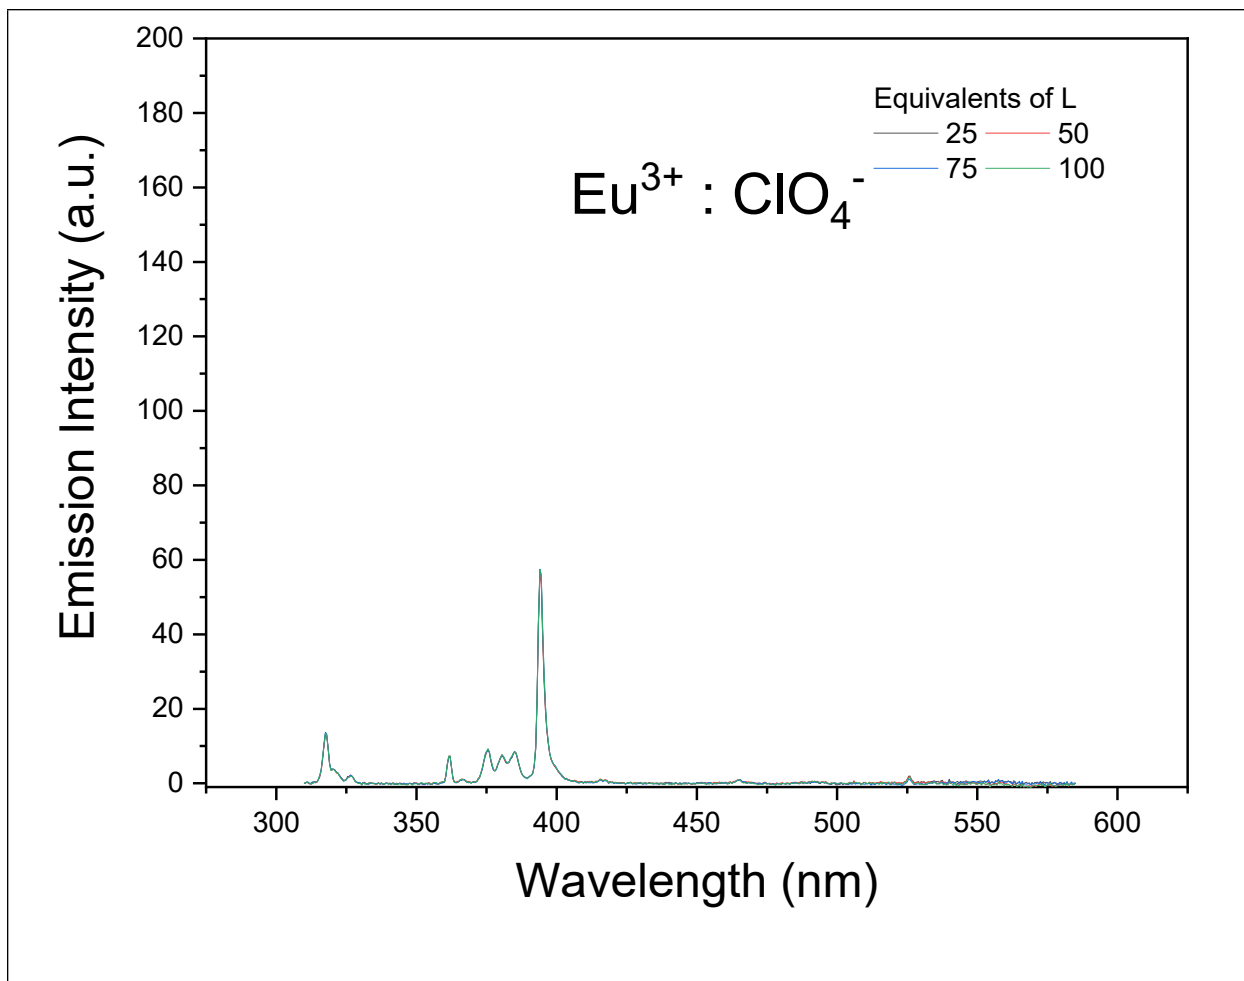

Figure S47. Excitation spectrum of  $\text{Eu}^{3+}$  in NaCl-MES buffer with various equivalents of  $\text{ClO}_4^-$ .

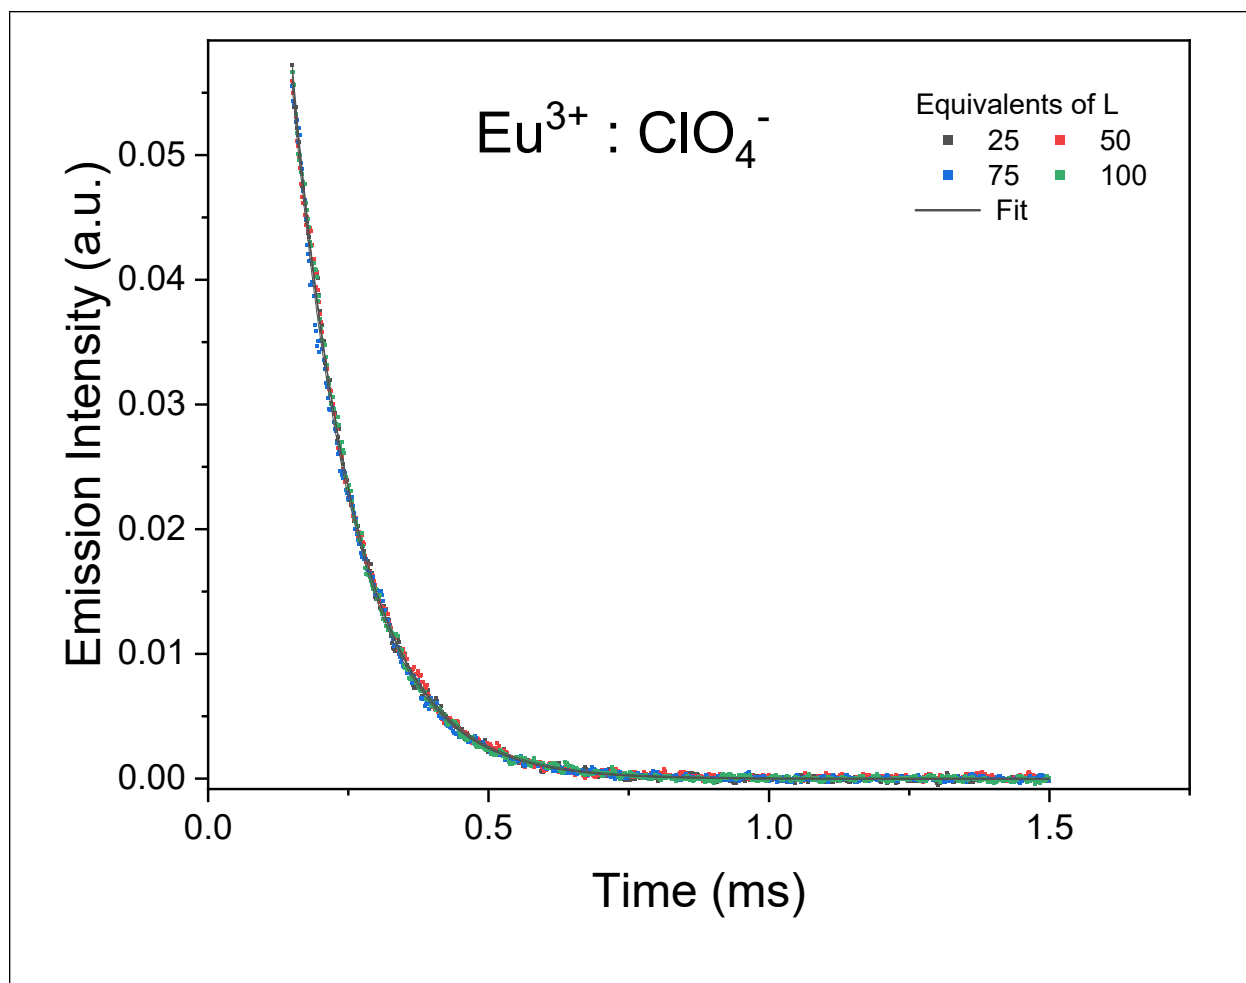

**Figure S48.** Time-resolved emission decay trace of  $\text{Eu}^{3+}$  in NaCl-MES buffer with various equivalents of  $\text{ClO}_4^-$ . The decay traces has been fit with a mono-exponential decay function.

**Table S7.** Fitting parameters for emission decay traces of  $\text{Eu}^{3+} : \text{ClO}_4^-$ .

| Trace | $y = A1 \cdot \exp(-x/t1) + y0$ |            |         |            |           |            |
|-------|---------------------------------|------------|---------|------------|-----------|------------|
|       | y0                              | y0 (Error) | A1      | A1 (Error) | t1        | t1 (error) |
| 25    | -5.48427E-5                     | 1.42481E-5 | 0.21585 | 8.60649E-4 | 112.46709 | 0.25006    |
| 50    | 4.16029E-5                      | 1.58827E-5 | 0.21096 | 9.3661E-4  | 113.47337 | 0.28288    |
| 75    | -1.26346E-5                     | 1.80902E-5 | 0.21269 | 0.00112    | 111.56605 | 0.32462    |
| 100   | -4.2986E-5                      | 1.43669E-5 | 0.21928 | 8.83699E-4 | 111.71682 | 0.24975    |



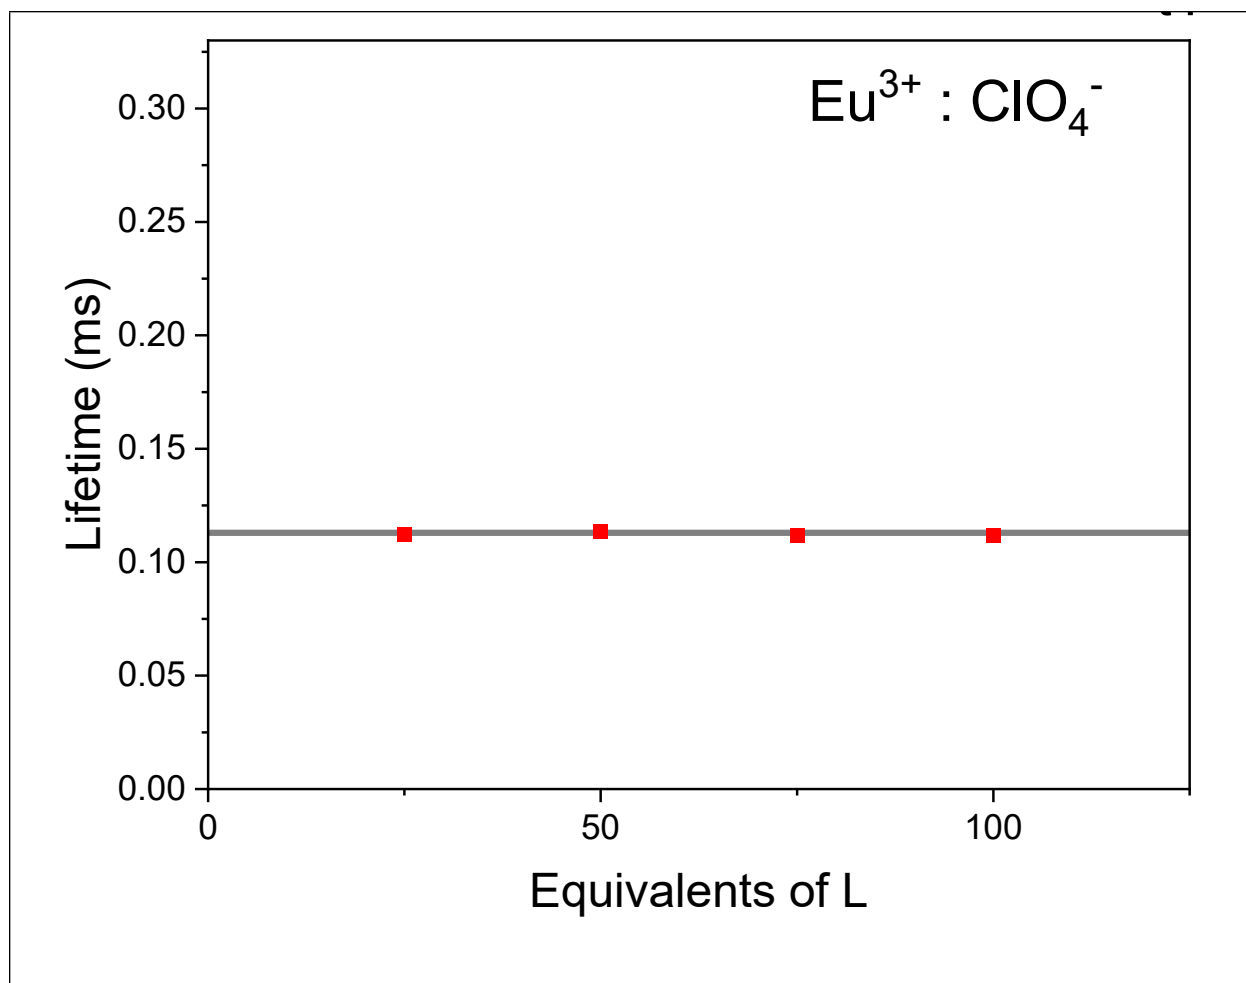

**Figure S49.** Excited state lifetime of Eu<sup>3+</sup> in NaCl-MES buffer as a function of equivalents of ClO<sub>4</sub><sup>-</sup>. The lifetimes has been determined from a mono-exponential decay function. The grey bar indicates the excited state lifetime of Eu<sup>3+</sup> in water.

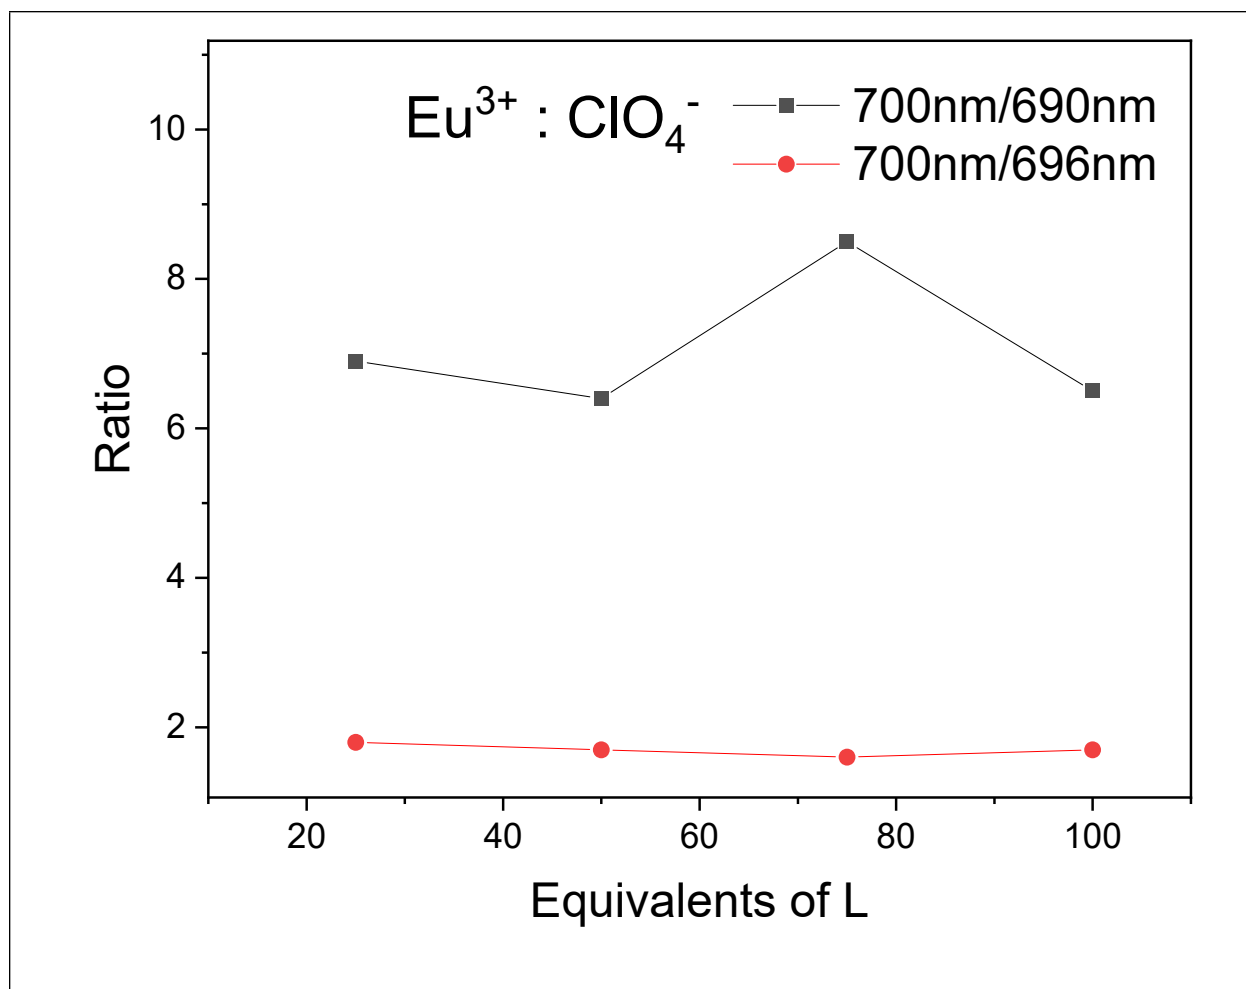

**Figure S50.** Ratios of emission intensity of  $\text{Eu}^{3+}$  in NaCl-MES buffer as a function of equivalents of  $\text{ClO}_4^-$ . The ratios give an indication of the changes in LF-splitting (see main text).



**Eu<sup>3+</sup> : OTf**

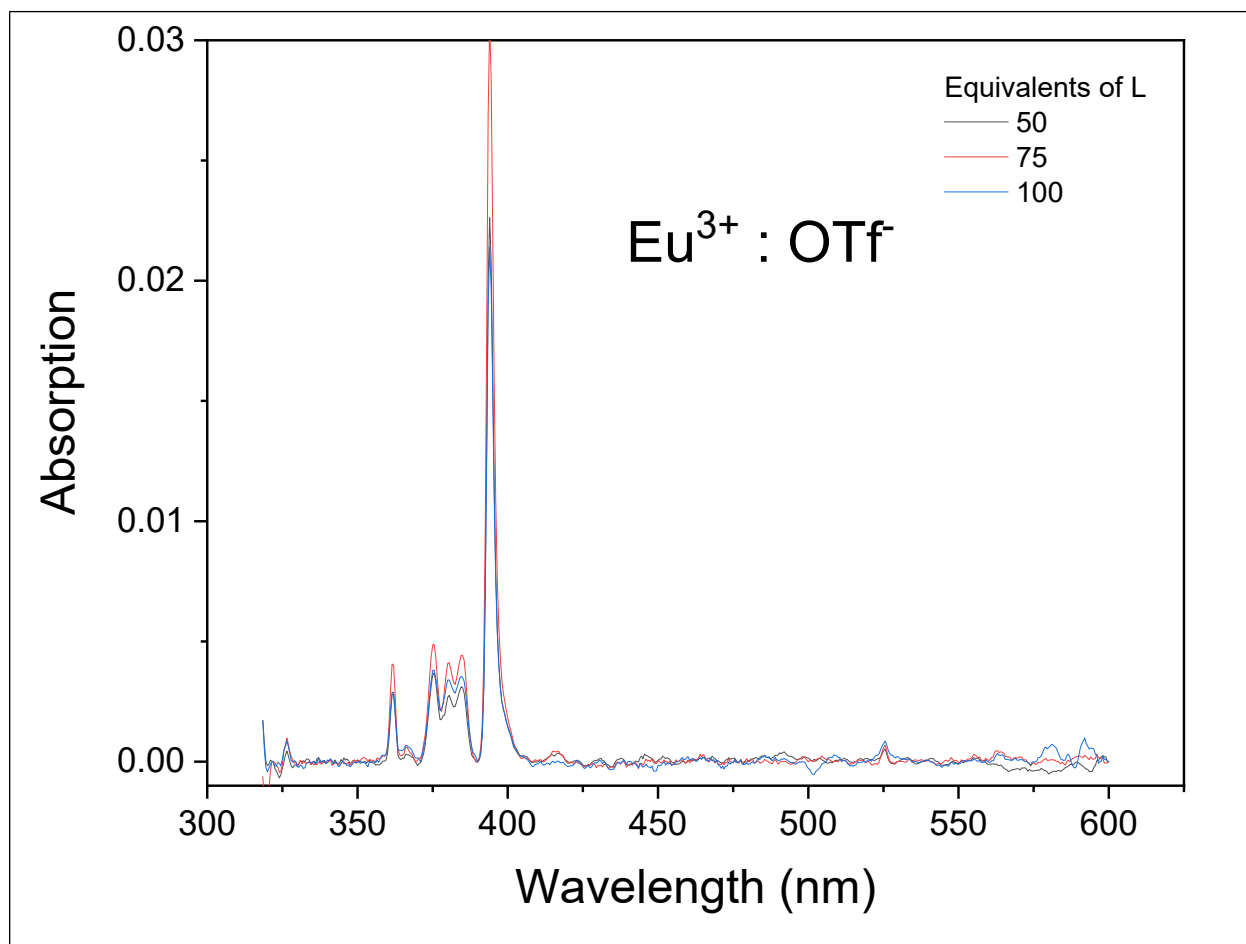

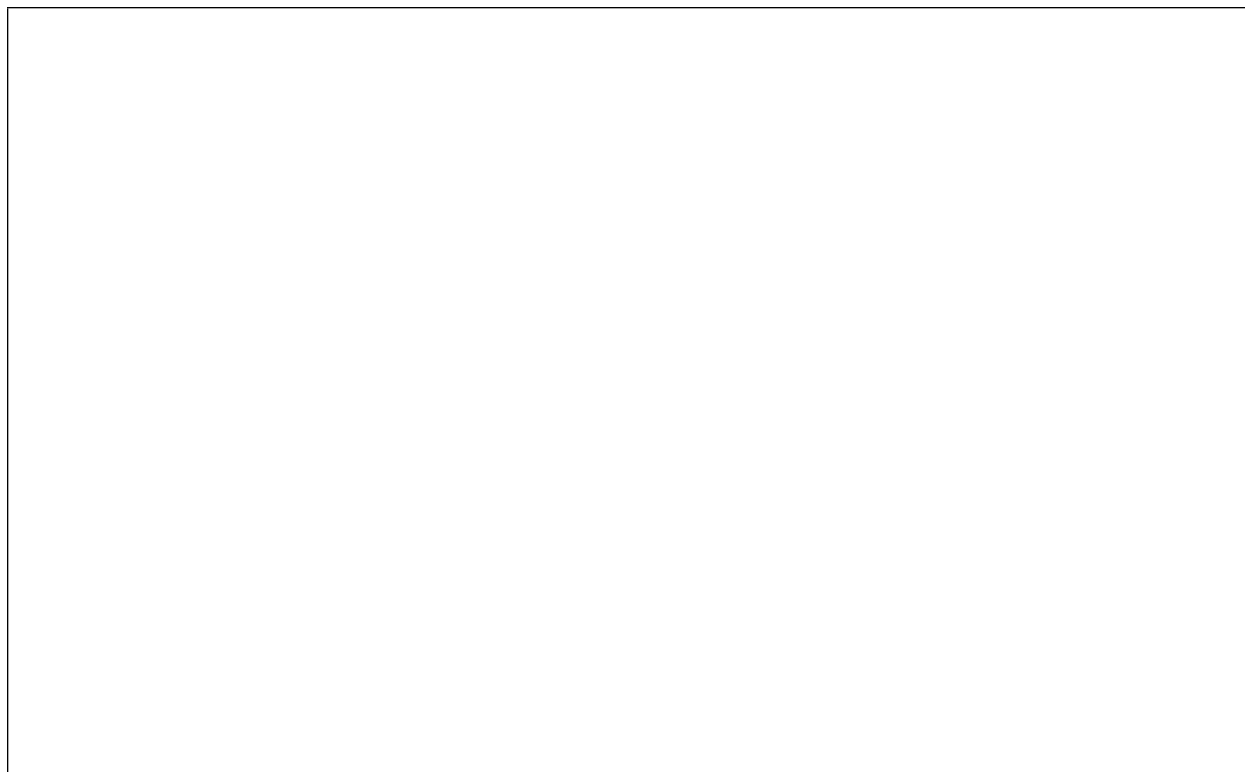

**Figure S51.** Absorption of  $\text{Eu}^{3+}$  in KCl-MES buffer with various equivalents of OTf.

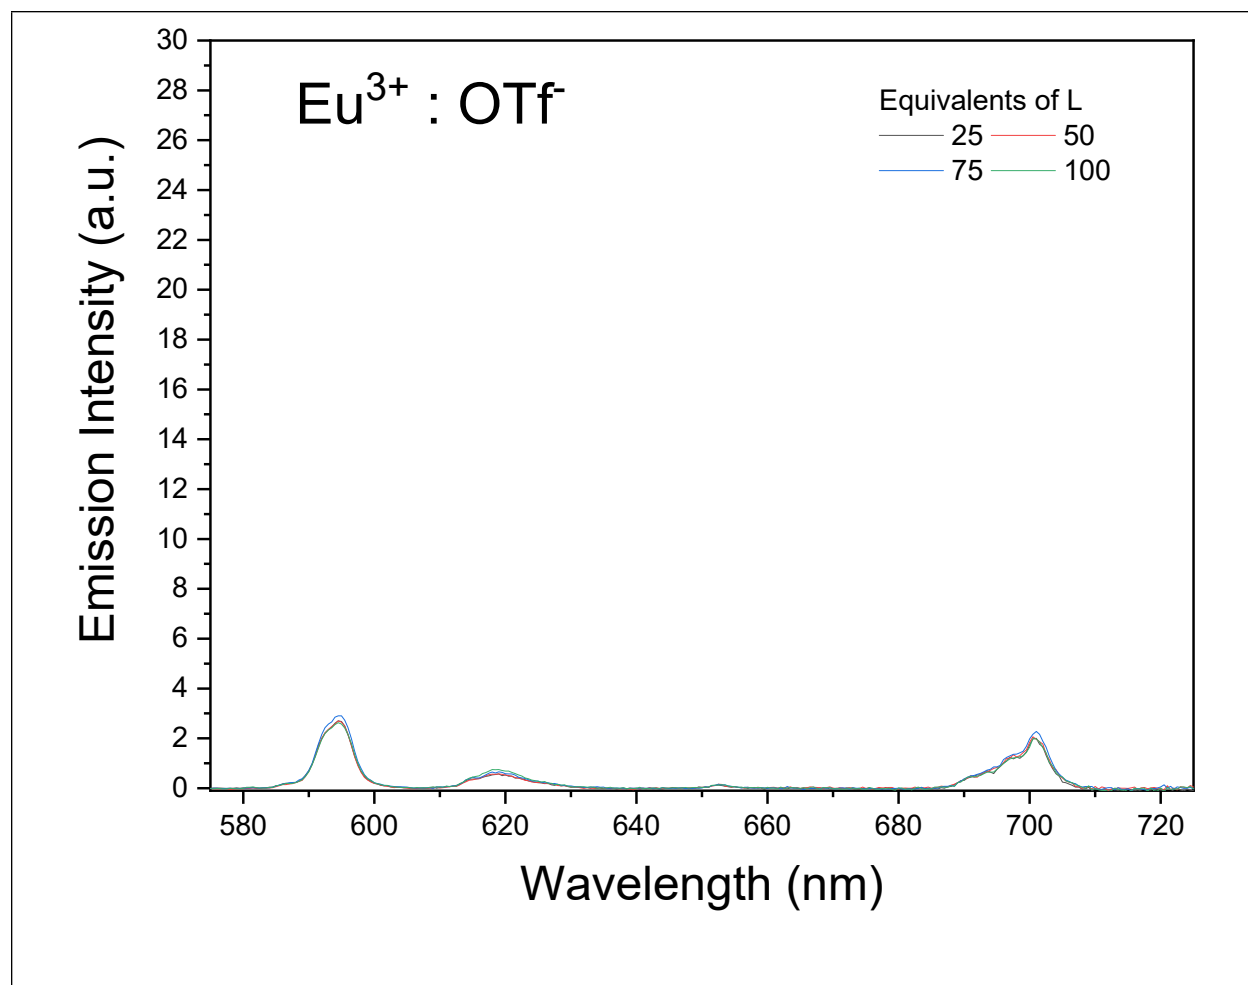

**Figure S52.** Emission spectrum of Eu<sup>3+</sup> in KCl-MES buffer with various equivalents of OTf.

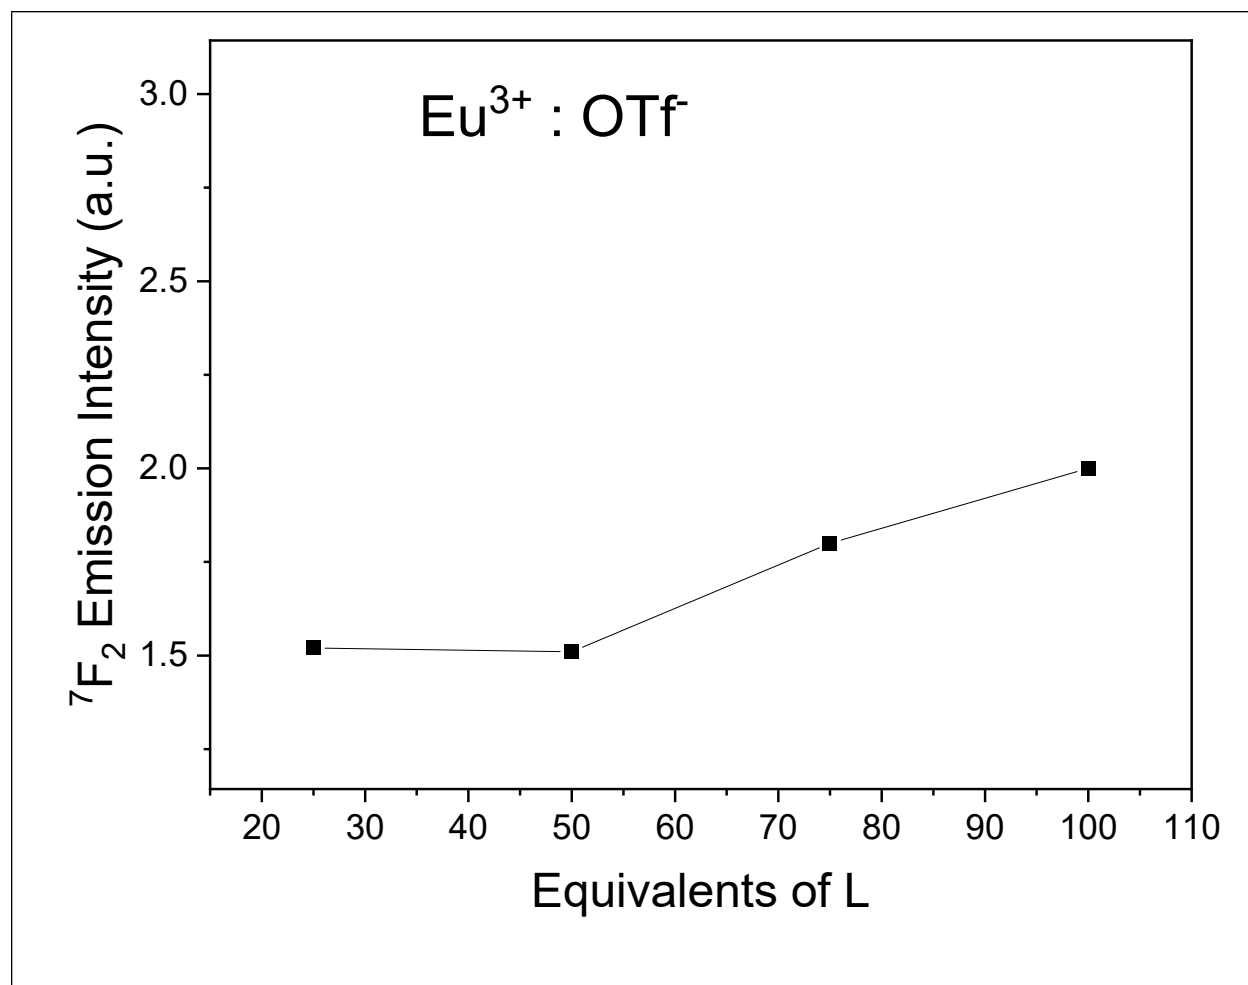

**Figure S53.** Emission intensity of the  $^5D_0 \rightarrow ^7F_2$  emission band of  $\text{Eu}^{3+}$  in KCl-MES buffer as a function of equivalents of  $\text{AcO}^-$ . The emission intensity was taken as the integration over the full  $^7F_2$  band (606-637 nm).

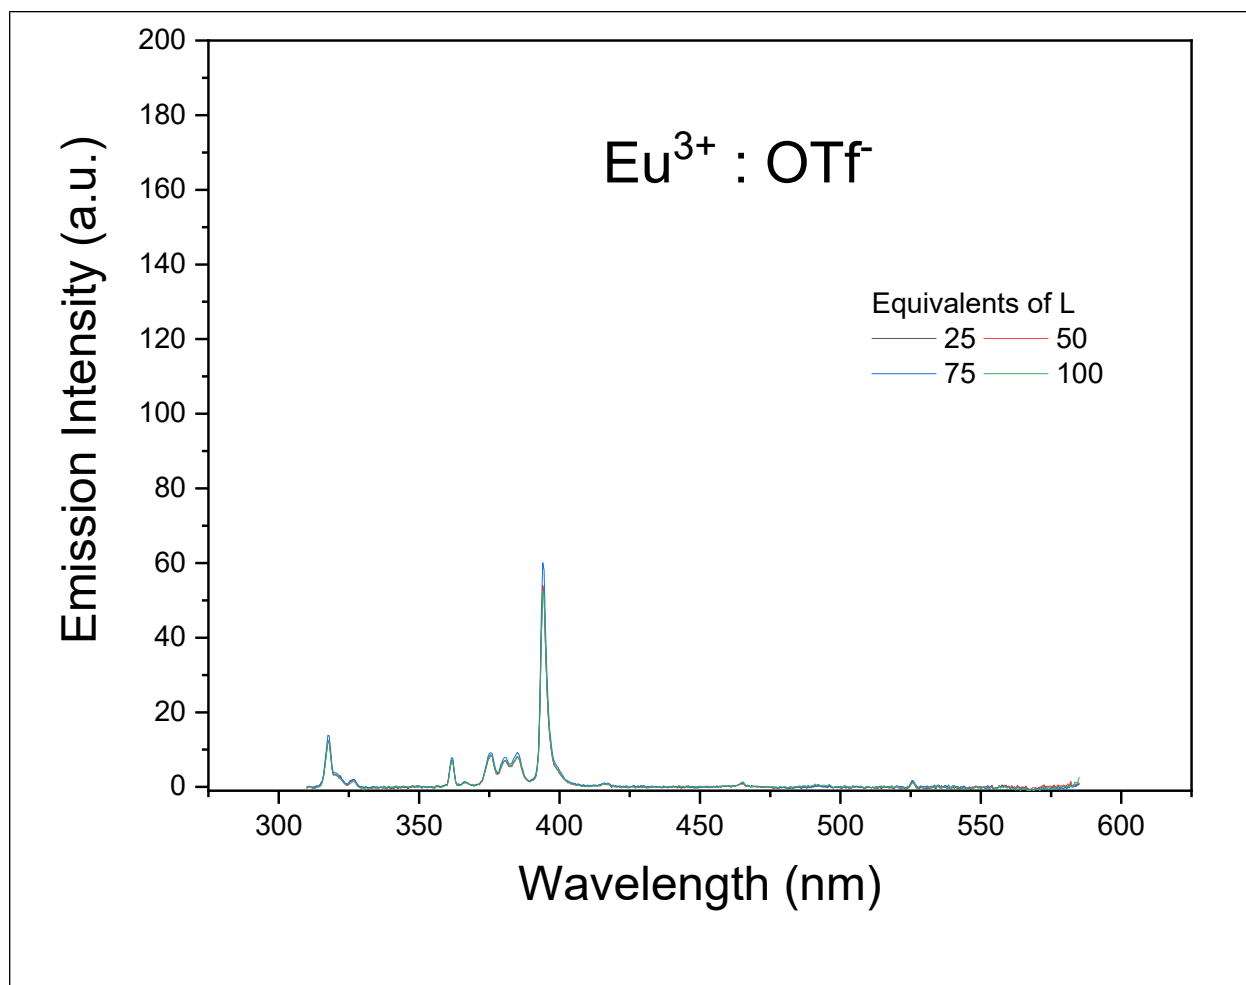

**Figure S54.** Excitation spectrum of Eu<sup>3+</sup> in KCl-MES buffer with various equivalents of OTf<sup>-</sup>.



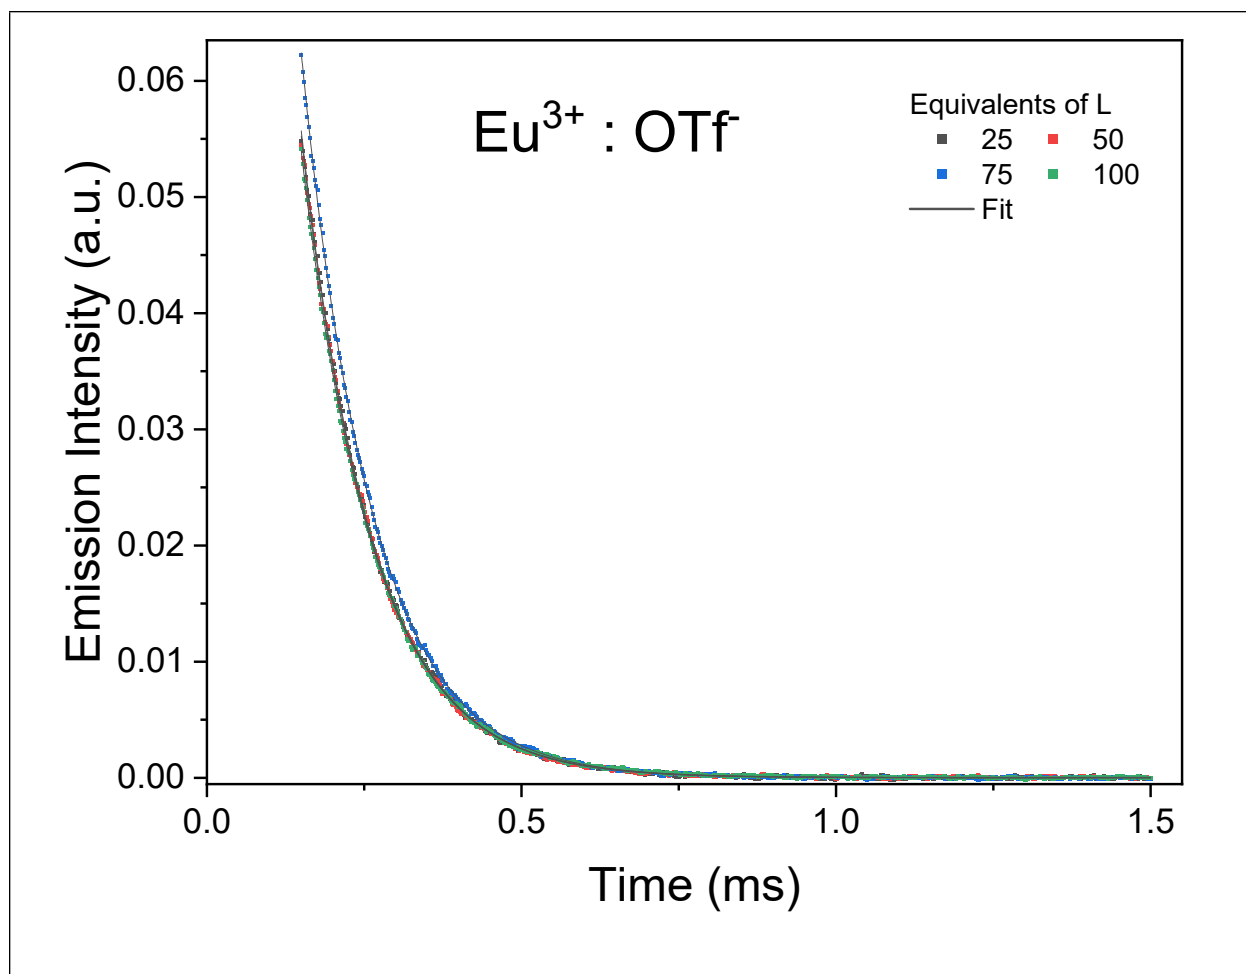

**Figure S55.** Time-resolved emission decay trace of Eu<sup>3+</sup> in KCl-MES buffer with various equivalents of OTf. The decay traces has been fit with a mono-exponential decay function.

**Table S8.** Fitting parameters for emission decay traces of  $\text{Eu}^{3+}$  : OTf.

| Trace | $y = A1 \cdot \exp(-x/t1) + y0$ |            |         |            |           |            |
|-------|---------------------------------|------------|---------|------------|-----------|------------|
|       | y0                              | y0 (Error) | A1      | A1 (Error) | t1        | t1 (error) |
| 25    | -5.6932E-6                      | 7.83155E-6 | 0.20997 | 4.66699E-4 | 113.03249 | 0.14064    |
| 50    | 9.87622E-6                      | 7.43641E-6 | 0.20946 | 4.48494E-4 | 112.53194 | 0.13442    |
| 75    | -6.89192E-6                     | 6.68021E-6 | 0.23658 | 4.02555E-4 | 112.56624 | 0.10688    |
| 100   | 3.31164E-5                      | 6.18182E-6 | 0.20149 | 3.61763E-4 | 113.79683 | 0.11498    |

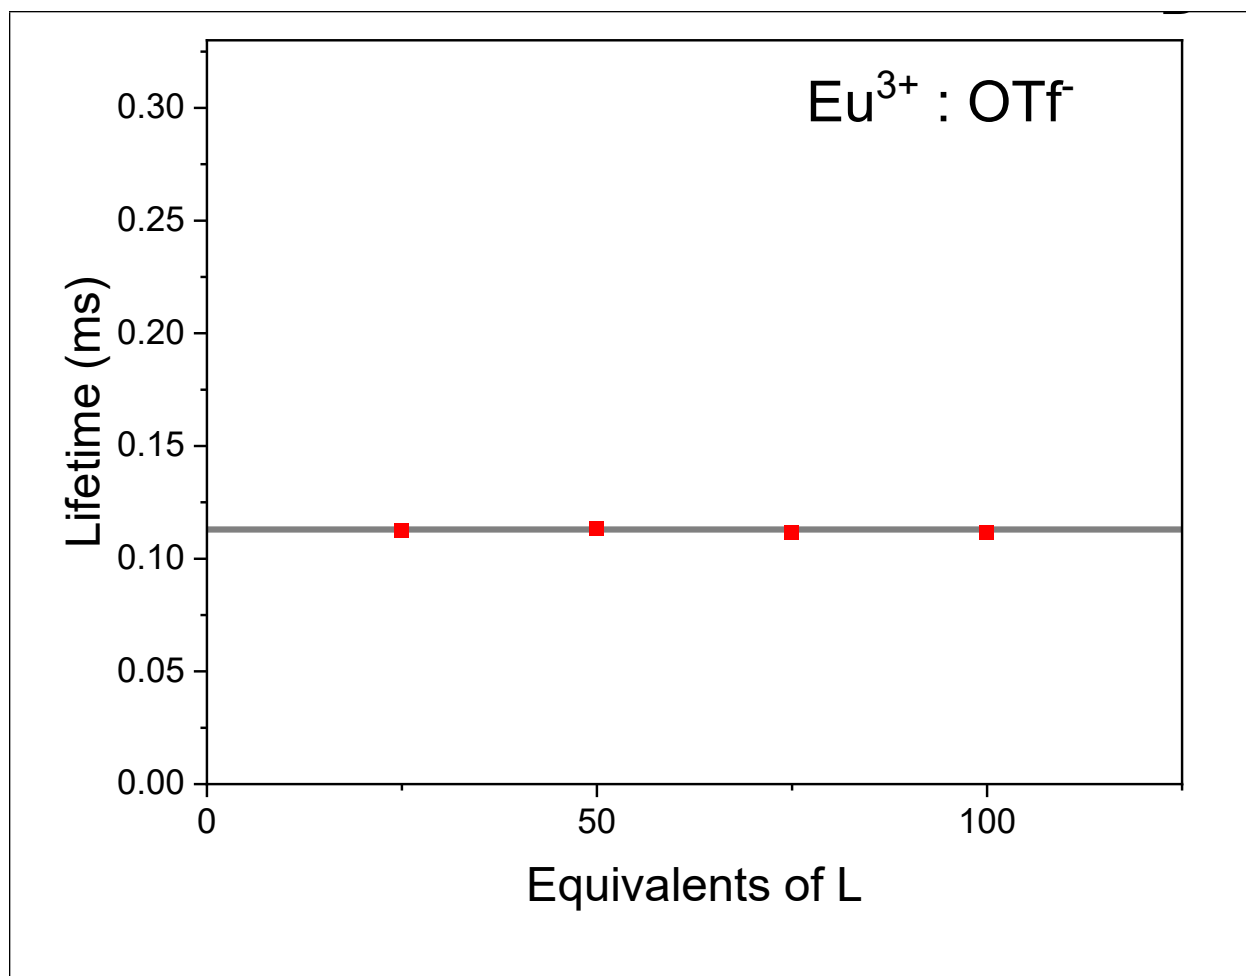

**Figure S56.** Excited state lifetime of Eu<sup>3+</sup> in KCl-MES buffer as a function of equivalents of OTf. The lifetimes has been determined from a mono-exponential decay function. The grey bar indicates the excited state lifetime of Eu<sup>3+</sup> in water.

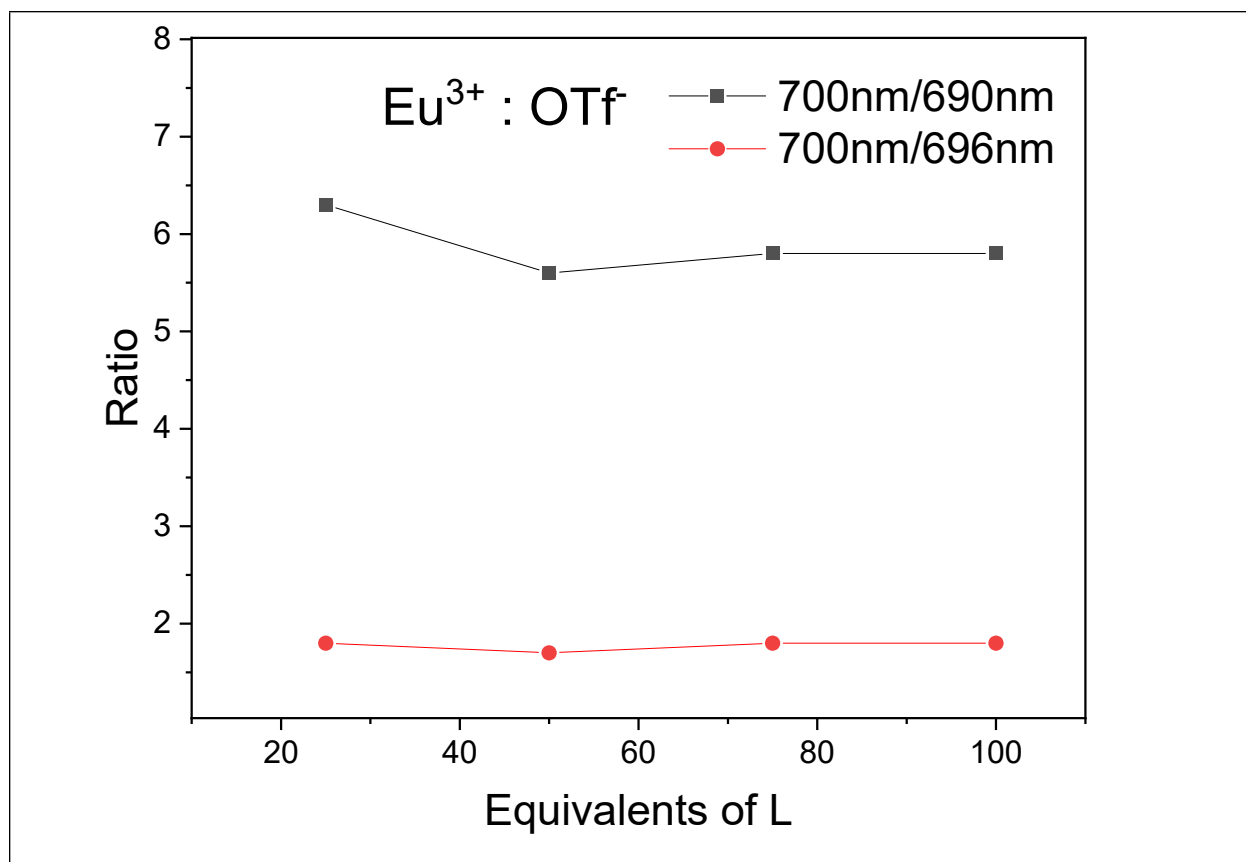

**Figure S57.** Ratios of emission intensity of  $\text{Eu}^{3+}$  in KCl-MES buffer as a function of equivalents of OTf. The ratios give an indication of the changes in LF-splitting (see main text).

## System Screening

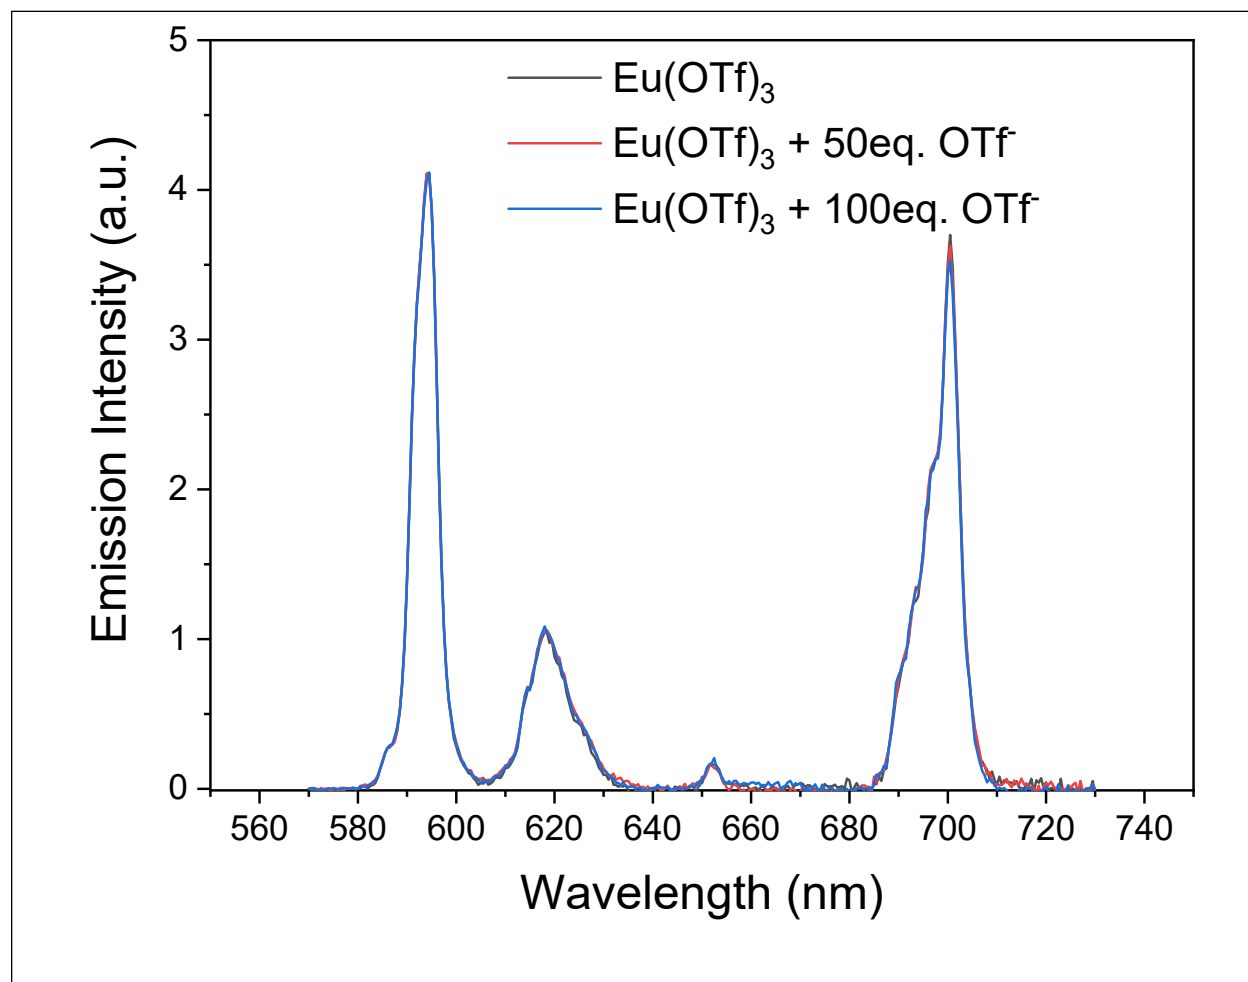

Figure S58. Emission spectrum of Eu(OTf)<sub>3</sub> in H<sub>2</sub>O with 0, 50 and 100 eq. of OTf.

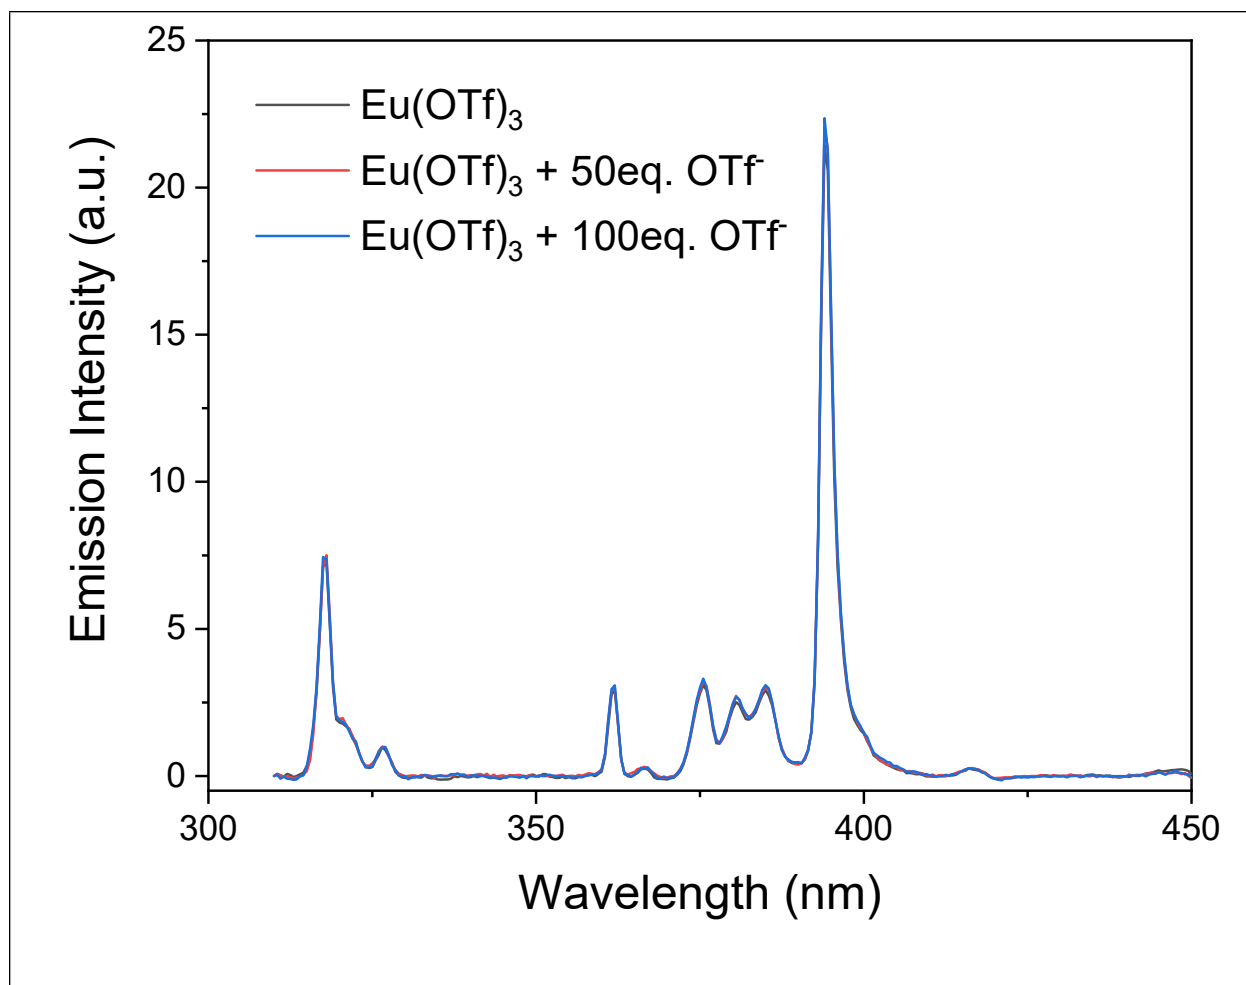

**Figure S59.** Excitation spectrum of  $\text{Eu}(\text{OTf})_3$  in  $\text{H}_2\text{O}$  with 0, 50 and 100 eq. of OTf.

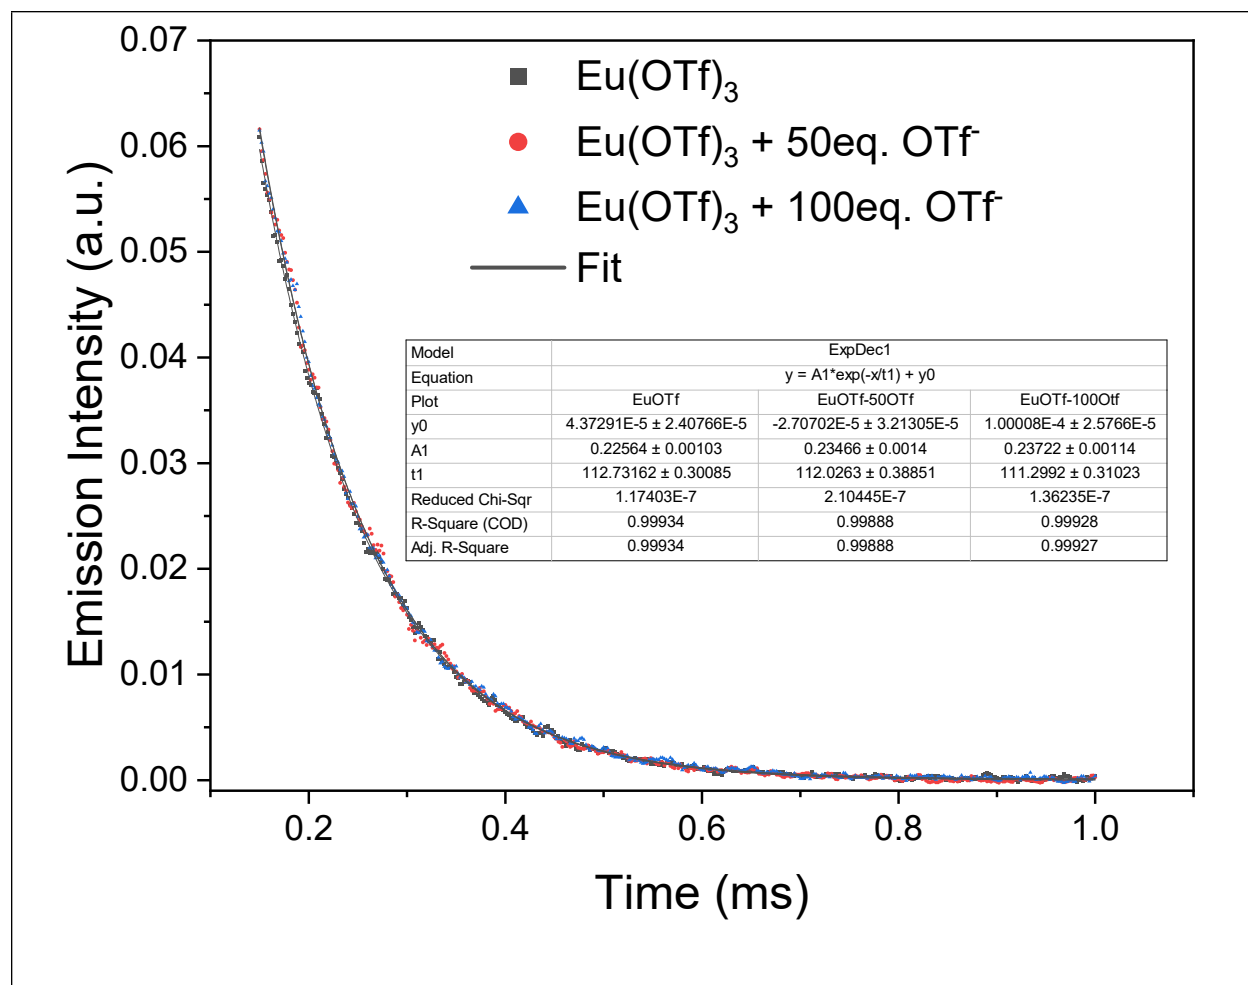

**Figure S60.** Time-resolved emission decay traces of  $\text{Eu}(\text{OTf})_3$  in  $\text{H}_2\text{O}$  with 0, 50 and 100 eq. of OTf. The data was fit with a mono-exponential decay function

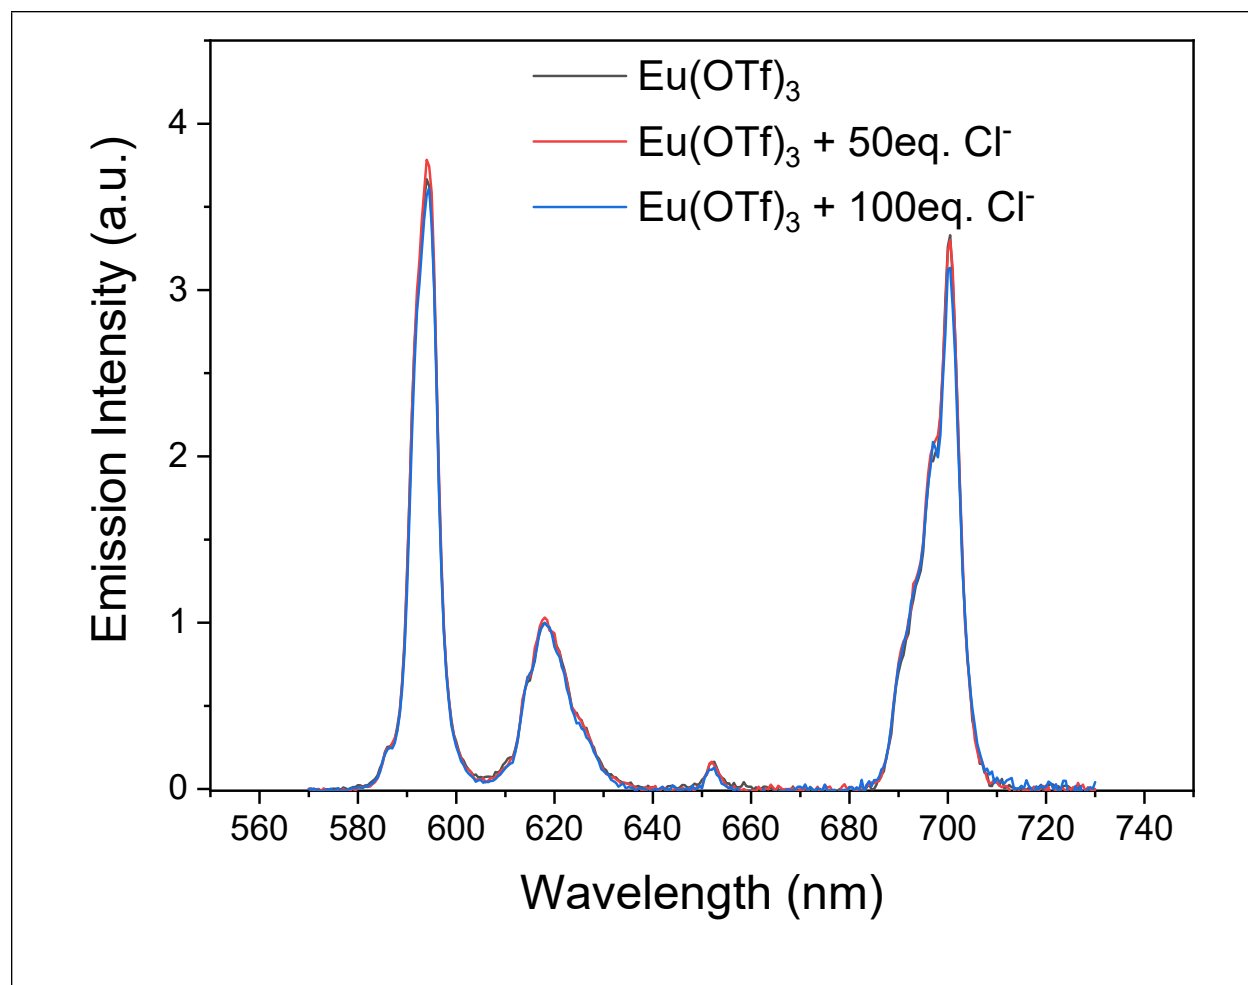

**Figure S61.** Emission spectrum of  $\text{Eu}(\text{OTf})_3$  in  $\text{H}_2\text{O}$  with 0, 50 and 100 eq. of  $\text{Cl}^-$ .



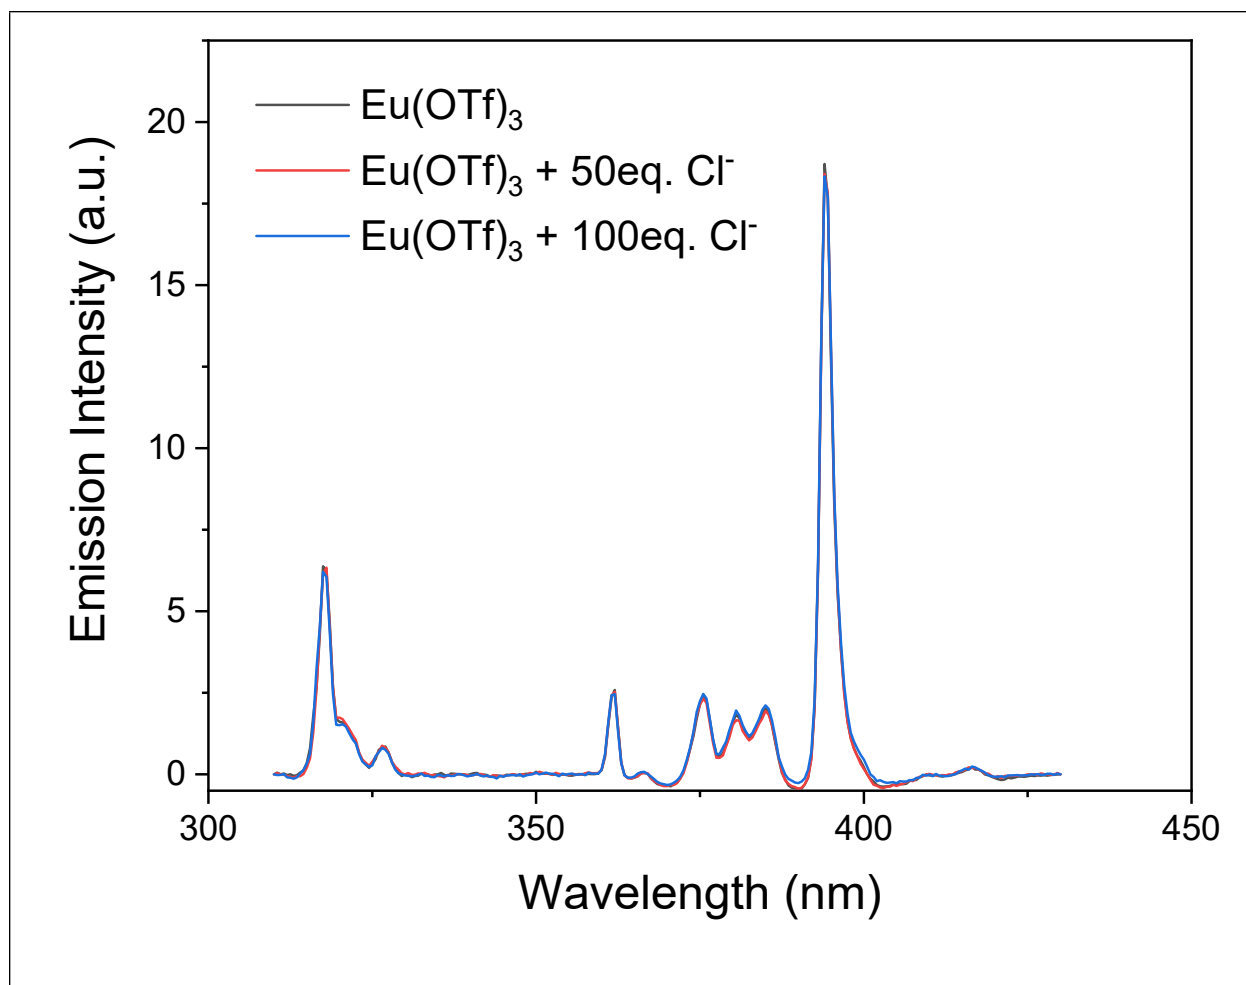

**Figure S62.** Excitation spectrum of  $\text{Eu}(\text{OTf})_3$  in  $\text{H}_2\text{O}$  with 0, 50 and 100 eq. of  $\text{Cl}^-$ .

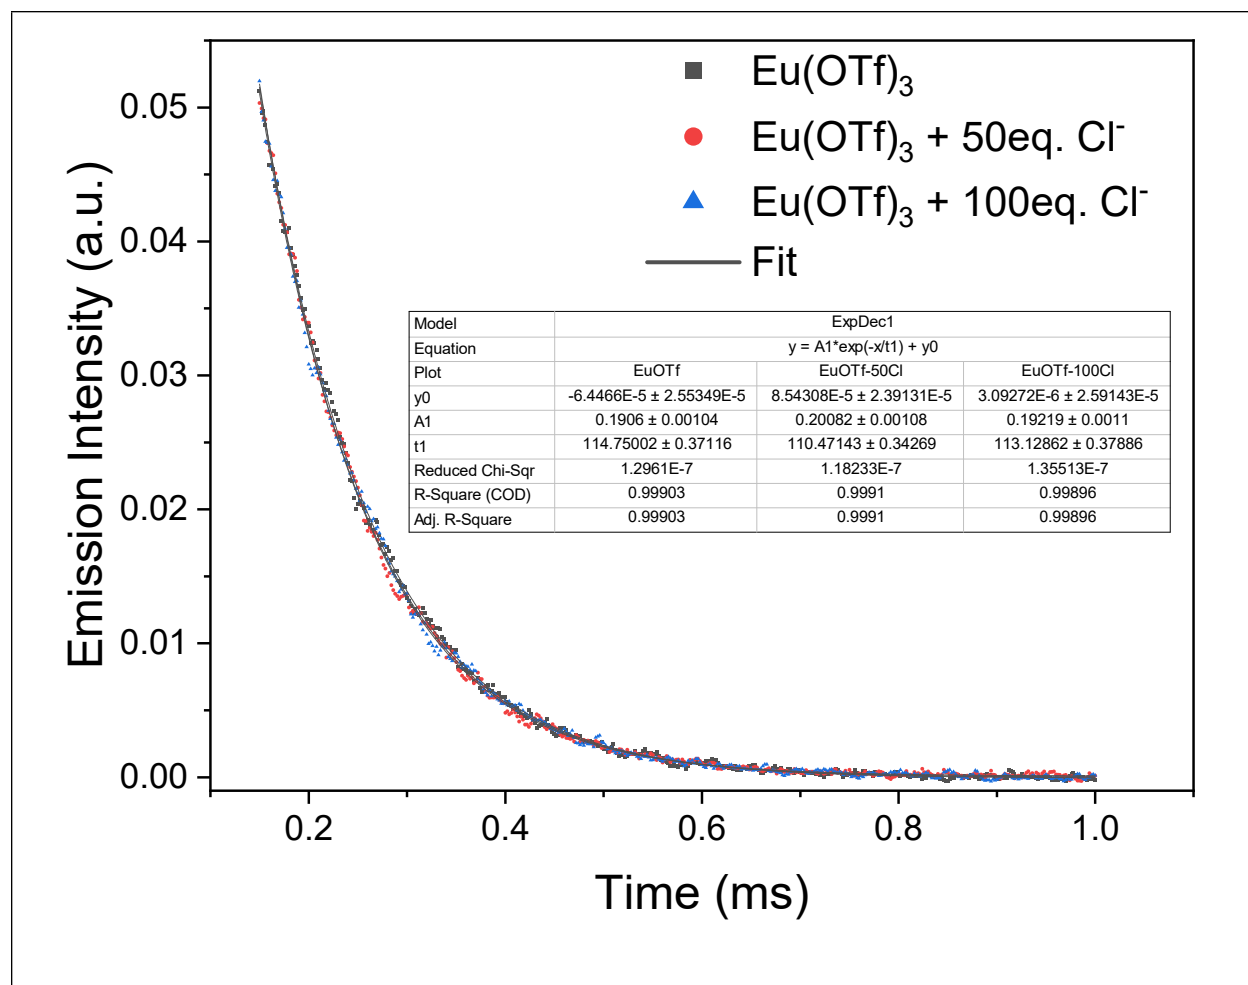

**Figure S63.** Time-resolved emission decay traces of  $\text{Eu}(\text{OTf})_3$  in  $\text{H}_2\text{O}$  with 0, 50 and 100 eq. of  $\text{Cl}^-$ . The data was fit with a mono-exponential decay function

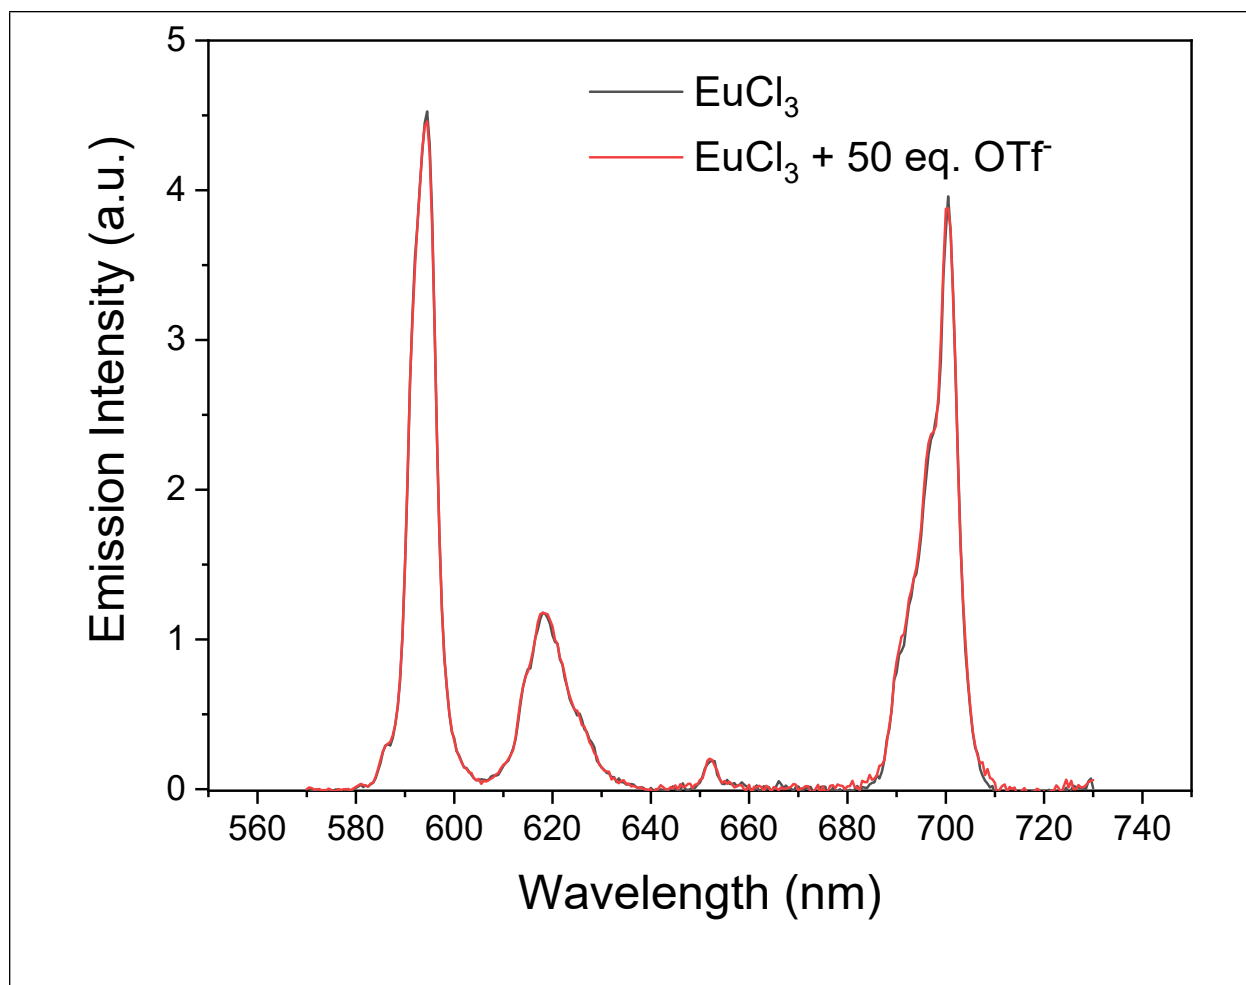

**Figure S64.** Emission spectrum of  $\text{Eu}(\text{Cl})_3$  in  $\text{H}_2\text{O}$  with 0 and 100 eq. of OTf.

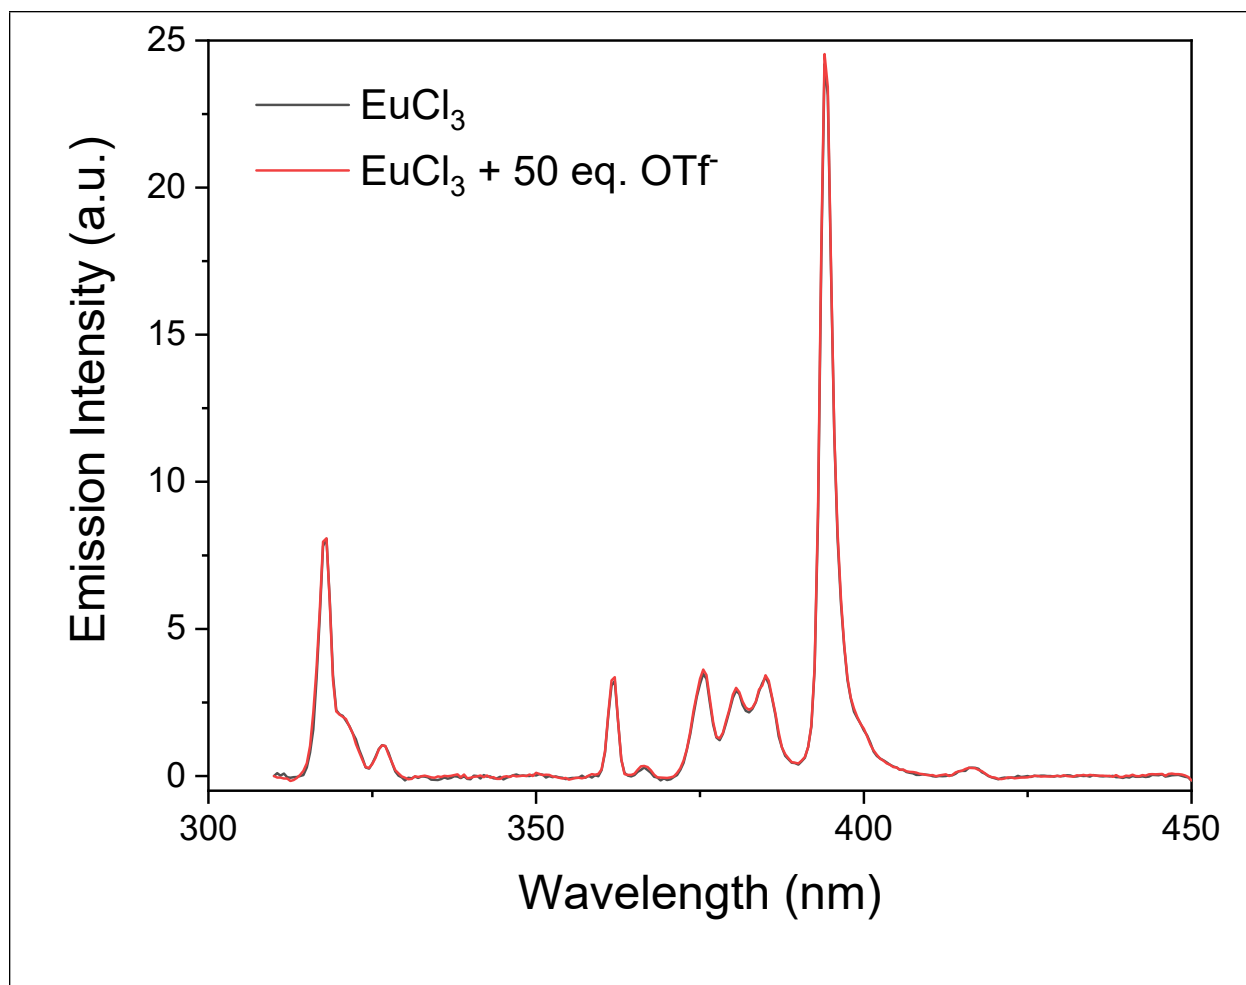

**Figure S65.** Excitation spectrum of  $\text{Eu}(\text{Cl})_3$  in  $\text{H}_2\text{O}$  with 0 and 100 eq. of OTf.

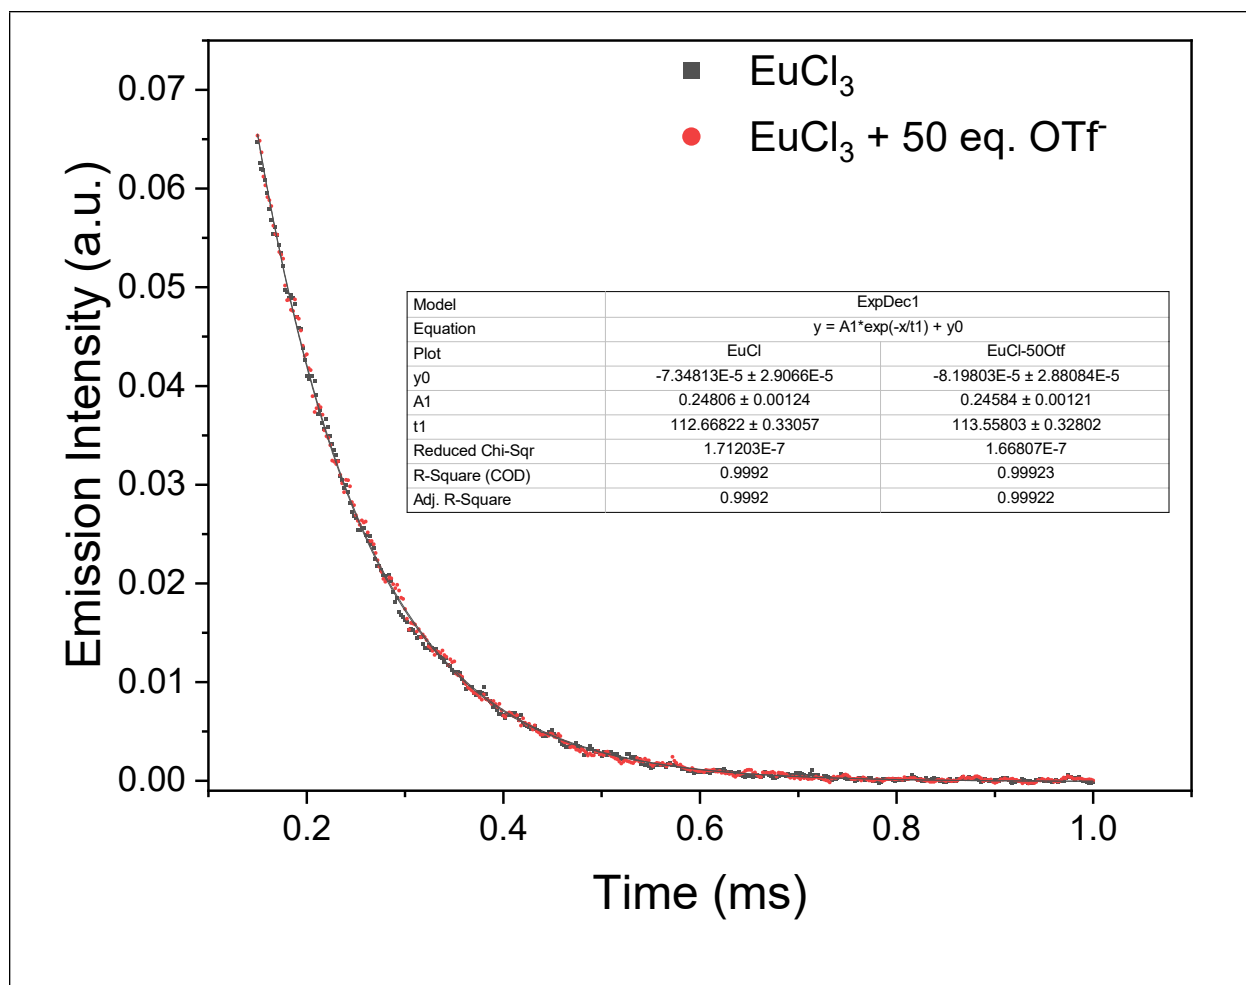

**Figure S66.** Time-resolved emission decay traces of  $\text{Eu}(\text{Cl})_3$  in  $\text{H}_2\text{O}$  with 0 and 50 eq. of OTf. The data was fit with a mono-exponential decay function

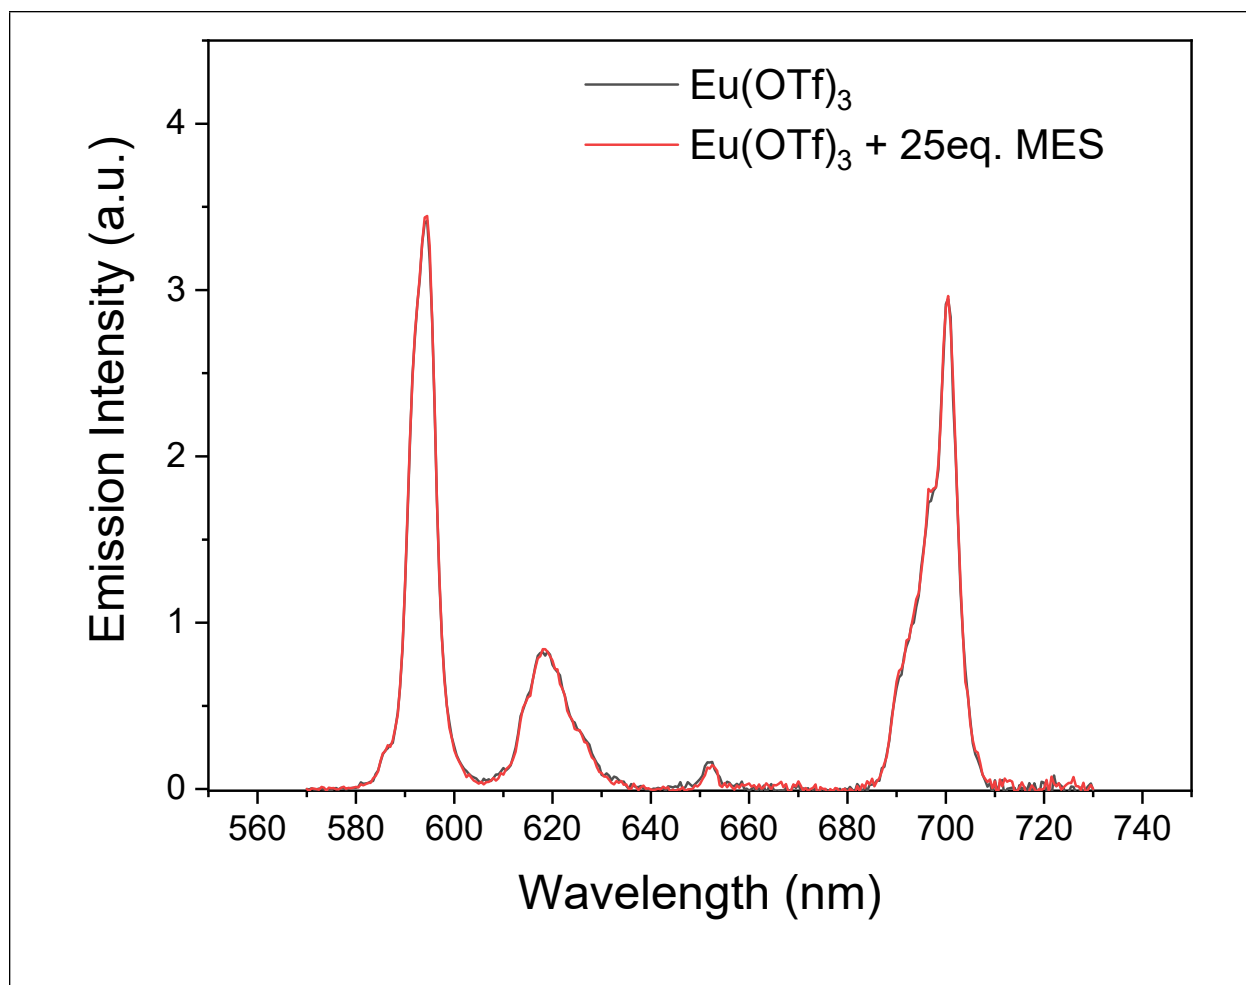

**Figure S67.** Emission spectrum of  $\text{Eu}(\text{OTf})_3$  in  $\text{H}_2\text{O}$  with 0 and 25 eq. of MES.

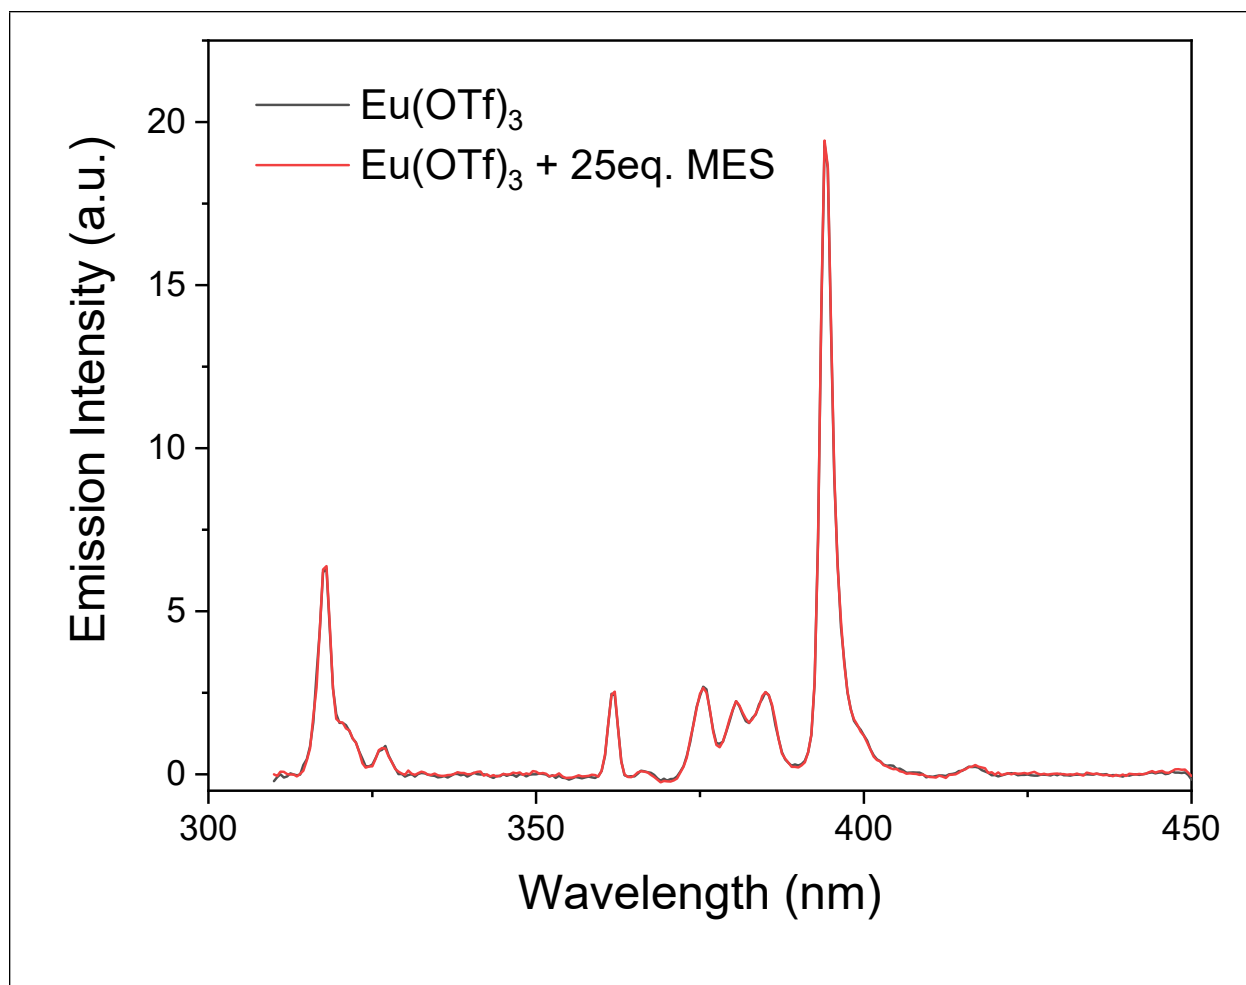

**Figure S68.** Excitation spectrum of  $\text{Eu}(\text{OTf})_3$  in  $\text{H}_2\text{O}$  with 0 and 25 eq. of MES.

## pH and Conductivity

**Table S9.** pH and conductivity of  $\text{Eu}^{3+}$  in NaCl-MES buffer (EDTA,  $\text{ClO}_4^-$ ) or KCl-MES buffer ( $\text{AcO}^-$ ,  $\text{NO}_3^-$ ,  $\text{HSO}_4^-$ ,  $\text{SO}_4^-$ ,  $\text{Cl}^-$ , OTf) with the ligands studied. Samples were prepared by adding 3.000 mL of  $\text{Eu}^{3+}$  Stock, the noted amount of Ligand Stock and adding water up to 4.000 mL. The final samples all contain 0.001 M  $\text{Eu}(\text{CF}_3\text{SO}_3)_3$ , 1M NaCl/KCl and 0.02M MES as well as the noted concentration of ligand.

|                      | Equivalent<br>s | $\text{Eu}(\text{CF}_3\text{SO}_3)_3$<br>(M) | L<br>Sample<br>(M) | $\text{Eu}^{3+}$<br>Stock <sup>a</sup><br>(mL) | L<br>Stock<br>(mL) | Water<br>(mL) | L<br>Stock <sup>b</sup><br>(M) | pH   | Conductivity | Ionic<br>Strength <sup>c</sup><br>$\times 10^6$ |
|----------------------|-----------------|----------------------------------------------|--------------------|------------------------------------------------|--------------------|---------------|--------------------------------|------|--------------|-------------------------------------------------|
| $\text{Eu}^{3+}$ (a) | -               | 0.01                                         | -                  | 3.000                                          | -                  | 1.000         | -                              | 5.47 | 108.5        | 1.74                                            |
| EDTA                 | 0.05            | 0.01                                         | 0.0005             | 3.000                                          | 0.017              | 0.983         | 0.12                           | 5.35 | 90.5         | 1.45                                            |
|                      | 0.1             | 0.01                                         | 0.001              | 3.000                                          | 0.033              | 0.967         | 0.12                           | 5.25 | 95.4         | 1.53                                            |
|                      | 0.2             | 0.01                                         | 0.002              | 3.000                                          | 0.067              | 0.933         | 0.12                           | 5.07 | 92.5         | 1.48                                            |
|                      | 0.3             | 0.01                                         | 0.003              | 3.000                                          | 0.100              | 0.900         | 0.12                           | 4.77 | 93           | 1.49                                            |
|                      | 0.4             | 0.01                                         | 0.004              | 3.000                                          | 0.133              | 0.867         | 0.12                           | 3.89 | 92.4         | 1.48                                            |
|                      | 0.5             | 0.01                                         | 0.005              | 3.000                                          | 0.167              | 0.833         | 0.12                           | 2.99 | 96.9         | 1.55                                            |
|                      | 0.6             | 0.01                                         | 0.006              | 3.000                                          | 0.200              | 0.800         | 0.12                           | 2.74 | 95           | 1.52                                            |
|                      | 0.7             | 0.01                                         | 0.007              | 3.000                                          | 0.233              | 0.767         | 0.12                           | 2.58 | 89.8         | 1.44                                            |
|                      | 0.8             | 0.01                                         | 0.008              | 3.000                                          | 0.267              | 0.733         | 0.12                           | 2.4  | 91.2         | 1.46                                            |
|                      | 0.9             | 0.01                                         | 0.009              | 3.000                                          | 0.300              | 0.700         | 0.12                           | 2.35 | 92.2         | 1.48                                            |
|                      | 1               | 0.01                                         | 0.01               | 3.000                                          | 0.333              | 0.667         | 0.12                           | 2.44 | 92.1         | 1.47                                            |
|                      | 1.5             | 0.01                                         | 0.015              | 3.000                                          | 0.500              | 0.500         | 0.12                           | 5.2  | 93.7         | 1.50                                            |
|                      | 2               | 0.01                                         | 0.02               | 3.000                                          | 0.667              | 0.333         | 0.12                           | 5.56 | 90.2         | 1.44                                            |
| 3                    | 0.01            | 0.03                                         | 3.000              | 1.000                                          | 0.000              | 0.12          | 6.15                           | 86.8 | 1.39         |                                                 |
| $\text{AcO}^-$       | 0.2             | 0.01                                         | 0.002              | 3.000                                          | 0.002              | 0.998         | 4                              | 5.58 | 113.6        | 1.82                                            |
|                      | 0.4             | 0.01                                         | 0.004              | 3.000                                          | 0.004              | 0.996         | 4                              | 5.6  | 113.9        | 1.82                                            |
|                      | 0.6             | 0.01                                         | 0.006              | 3.000                                          | 0.006              | 0.994         | 4                              | 5.63 | 113.3        | 1.81                                            |
|                      | 0.8             | 0.01                                         | 0.008              | 3.000                                          | 0.008              | 0.992         | 4                              | 5.7  | 114          | 1.82                                            |
|                      | 1               | 0.01                                         | 0.01               | 3.000                                          | 0.010              | 0.990         | 4                              | 5.66 | 111.9        | 1.79                                            |
|                      | 2               | 0.01                                         | 0.02               | 3.000                                          | 0.020              | 0.980         | 4                              | 5.75 | 114.7        | 1.84                                            |
|                      | 3               | 0.01                                         | 0.03               | 3.000                                          | 0.030              | 0.970         | 4                              | 5.81 | 114.6        | 1.83                                            |
|                      | 4               | 0.01                                         | 0.04               | 3.000                                          | 0.040              | 0.960         | 4                              | 5.86 | 114.1        | 1.83                                            |
|                      | 5               | 0.01                                         | 0.05               | 3.000                                          | 0.050              | 0.950         | 4                              | 5.89 | 106.7        | 1.71                                            |
|                      | 7               | 0.01                                         | 0.07               | 3.000                                          | 0.070              | 0.930         | 4                              | -    | 120.1        | 1.92                                            |
|                      | 10              | 0.01                                         | 0.1                | 3.000                                          | 0.100              | 0.900         | 4                              | 5.98 | 113.6        | 1.82                                            |
|                      | 15              | 0.01                                         | 0.15               | 3.000                                          | 0.150              | 0.850         | 4                              | 6.17 | 120.1        | 1.92                                            |



---

|     |      |      |       |       |       |   |          |       |      |
|-----|------|------|-------|-------|-------|---|----------|-------|------|
| 20  | 0.01 | 0.2  | 3.000 | 0.200 | 0.800 | 4 | 6.2<br>5 | 119.4 | 1.91 |
| 25  | 0.01 | 0.25 | 3.000 | 0.250 | 0.750 | 4 | 6.3      | 125.2 | 2.00 |
| 33  | 0.01 | 0.3  | 3.000 | 0.300 | 0.700 | 4 | 6.4<br>3 | 127.6 | 2.04 |
| 40  | 0.01 | 0.4  | 3.000 | 0.400 | 0.600 | 4 | 6.4<br>9 | 134.5 | 2.15 |
| 50  | 0.01 | 0.5  | 3.000 | 0.500 | 0.500 | 4 | 6.5<br>6 | 135.4 | 2.17 |
| 60  | 0.01 | 0.6  | 3.000 | 0.600 | 0.400 | 4 | 6.6<br>4 | 139.3 | 2.23 |
| 70  | 0.01 | 0.7  | 3.000 | 0.700 | 0.300 | 4 | 6.7<br>3 | 149.8 | 2.40 |
| 80  | 0.01 | 0.8  | 3.000 | 0.800 | 0.200 | 4 | -        | 153.4 | 2.45 |
| 90  | 0.01 | 0.9  | 3.000 | 0.900 | 0.100 | 4 | 6.8<br>4 | 157.4 | 2.52 |
| 100 | 0.01 | 1    | 3.000 | 1.000 | 0.000 | 4 | 6.8<br>8 | 154.8 | 2.48 |
| 130 | 0.01 | 1.3  | 3.000 | 0.867 | 0.133 | 6 | 7.0<br>3 | 164.9 | 2.64 |
| 150 | 0.01 | 1.5  | 3.000 | 1.000 | 0.000 | 6 | 7.1<br>4 | 173.8 | 2.78 |

---

Table S9. Continued

|                               | Equivalent<br>s | Eu(CF <sub>3</sub> SO <sub>3</sub> ) <sub>3</sub><br>(M) | L<br>Sample<br>(M) | Eu <sup>3+</sup><br>Stock <sup>a</sup><br>(mL) | L<br>Stock<br>(mL) | Water<br>(mL) | L<br>Stock <sup>b</sup><br>(M) | pH       | Conductivity | Ionic<br>Strength <sup>c</sup><br>x10 <sup>6</sup> |
|-------------------------------|-----------------|----------------------------------------------------------|--------------------|------------------------------------------------|--------------------|---------------|--------------------------------|----------|--------------|----------------------------------------------------|
| NO <sub>3</sub> <sup>-</sup>  | 3               | 0.01                                                     | 0.03               | 3.000                                          | 0.015              | 0.985         | 8                              | 5.5      | 111.6        | 1.79                                               |
|                               | 5               | 0.01                                                     | 0.05               | 3.000                                          | 0.025              | 0.975         | 8                              | 5.5      | 110.6        | 1.77                                               |
|                               | 7               | 0.01                                                     | 0.07               | 3.000                                          | 0.035              | 0.965         | 8                              | 5.4<br>9 | 112.8        | 1.80                                               |
|                               | 8               | 0.01                                                     | 0.08               | 3.000                                          | 0.040              | 0.960         | 8                              | 5.4<br>9 | 112.1        | 1.79                                               |
|                               | 10              | 0.01                                                     | 0.10               | 3.000                                          | 0.050              | 0.950         | 8                              | 5.5<br>1 | 118.7        | 1.90                                               |
|                               | 25              | 0.01                                                     | 0.25               | 3.000                                          | 0.125              | 0.875         | 8                              | 5.5      | 121.9        | 1.95                                               |
|                               | 30              | 0.01                                                     | 0.30               | 3.000                                          | 0.150              | 0.850         | 8                              | 5.5      | 127.2        | 2.04                                               |
|                               | 35              | 0.01                                                     | 0.35               | 3.000                                          | 0.175              | 0.825         | 8                              | 5.5      | 122.7        | 1.96                                               |
|                               | 40              | 0.01                                                     | 0.40               | 3.000                                          | 0.200              | 0.800         | 8                              | 5.5<br>3 | 130.4        | 2.09                                               |
|                               | 50              | 0.01                                                     | 0.50               | 3.000                                          | 0.250              | 0.750         | 8                              | 5.5<br>2 | 136          | 2.18                                               |
|                               | 60              | 0.01                                                     | 0.60               | 3.000                                          | 0.300              | 0.700         | 8                              | 5.5<br>2 | 131.4        | 2.10                                               |
|                               | 80              | 0.01                                                     | 0.80               | 3.000                                          | 0.400              | 0.600         | 8                              | 5.5<br>4 | 142.1        | 2.27                                               |
|                               | 100             | 0.01                                                     | 1.00               | 3.000                                          | 0.500              | 0.500         | 8                              | 5.5<br>4 | 155.2        | 2.48                                               |
|                               | 133             | 0.01                                                     | 1.33               | 3.000                                          | 0.665              | 0.335         | 8                              | 5.5<br>9 | 162.7        | 2.60                                               |
|                               | 150             | 0.01                                                     | 1.50               | 3.000                                          | 0.750              | 0.250         | 8                              | 5.5<br>8 | 164.2        | 2.63                                               |
|                               | 200             | 0.01                                                     | 2.00               | 3.000                                          | 1.000              | 0.000         | 8                              | 5.6<br>3 | 187.5        | 3.00                                               |
| HSO <sub>4</sub> <sup>-</sup> | 0.5             | 0.01                                                     | 0.01               | 3.000                                          | 0.010              | 0.990         | 2                              | 2.2<br>2 | 92           | 1.47                                               |
|                               | 1               | 0.01                                                     | 0.01               | 3.000                                          | 0.020              | 0.980         | 2                              | 1.9<br>8 | 136.8        | 2.19                                               |
|                               | 2               | 0.01                                                     | 0.02               | 3.000                                          | 0.040              | 0.960         | 2                              | 1.7<br>4 | 123.8        | 1.98                                               |
|                               | 3               | 0.01                                                     | 0.03               | 3.000                                          | 0.060              | 0.940         | 2                              | 1.5      | 140.5        | 2.25                                               |
|                               | 4               | 0.01                                                     | 0.04               | 3.000                                          | 0.080              | 0.920         | 2                              | 1.4<br>1 | 140.4        | 2.25                                               |
|                               | 5               | 0.01                                                     | 0.05               | 3.000                                          | 0.100              | 0.900         | 2                              | 1.1<br>6 | 102.9        | 1.65                                               |
|                               | 6               | 0.01                                                     | 0.06               | 3.000                                          | 0.120              | 0.880         | 2                              | 1.2<br>8 | 142.7        | 2.28                                               |
|                               | 7               | 0.01                                                     | 0.07               | 3.000                                          | 0.140              | 0.860         | 2                              | 1.2<br>5 | 143.8        | 2.30                                               |
|                               | 8               | 0.01                                                     | 0.08               | 3.000                                          | 0.160              | 0.840         | 2                              | 1.2<br>4 | 137          | 2.19                                               |
|                               | 9               | 0.01                                                     | 0.09               | 3.000                                          | 0.180              | 0.820         | 2                              | 1.1<br>6 | 146.1        | 2.34                                               |
|                               | 10              | 0.01                                                     | 0.10               | 3.000                                          | 0.200              | 0.800         | 2                              | 1.1<br>5 | 150.1        | 2.40                                               |
|                               | 15              | 0.01                                                     | 0.15               | 3.000                                          | 0.300              | 0.700         | 2                              | 1.0<br>6 | 152.7        | 2.44                                               |
|                               | 20              | 0.01                                                     | 0.20               | 3.000                                          | 0.400              | 0.600         | 2                              | -        | -            | -                                                  |
|                               | 25              | 0.01                                                     | 0.25               | 3.000                                          | 0.500              | 0.500         | 2                              | -        | -            | -                                                  |
|                               | 30              | 0.01                                                     | 0.30               | 3.000                                          | 0.600              | 0.400         | 2                              | -        | -            | -                                                  |
|                               | 35              | 0.01                                                     | 0.35               | 3.000                                          | 0.700              | 0.300         | 2                              | -        | -            | -                                                  |
| 40                            | 0.01            | 0.4                                                      | 3.000              | 0.800                                          | 0.200              | 2             | -                              | -        | -            |                                                    |
| 45                            | 0.01            | 0.45                                                     | 3.000              | 0.900                                          | 0.100              | 2             | -                              | -        | -            |                                                    |
| S                             | 0.5             | 0.01                                                     | 0.01               | 3.000                                          | 0.010              | 0.990         | 2                              | -        | 132.4        | 2.12                                               |
|                               | 1               | 0.01                                                     | 0.01               | 3.000                                          | 0.020              | 0.980         | 2                              | 5.2      | 126          | 2.02                                               |

|                               |     |      |      |       |       |       |   |          |       |      |
|-------------------------------|-----|------|------|-------|-------|-------|---|----------|-------|------|
|                               | 2   | 0.01 | 0.02 | 3.000 | 0.040 | 0.960 | 2 | 4<br>5.2 | 133   | 2.13 |
|                               | 3   | 0.01 | 0.03 | 3.000 | 0.060 | 0.940 | 2 | 5.2<br>5 | 124.9 | 2.00 |
|                               | 4   | 0.01 | 0.04 | 3.000 | 0.080 | 0.920 | 2 | 5.3<br>5 | 91.3  | 1.46 |
|                               | 5   | 0.01 | 0.05 | 3.000 | 0.100 | 0.900 | 2 | 5.3<br>5 | 89.6  | 1.43 |
|                               | 6   | 0.01 | 0.06 | 3.000 | 0.120 | 0.880 | 2 | 5.2<br>7 | 124.8 | 2.00 |
|                               | 7   | 0.01 | 0.07 | 3.000 | 0.140 | 0.860 | 2 | 5.2<br>7 | 129.4 | 2.07 |
|                               | 8   | 0.01 | 0.08 | 3.000 | 0.160 | 0.840 | 2 | 5.2<br>7 | 124.7 | 2.00 |
|                               | 9   | 0.01 | 0.09 | 3.000 | 0.180 | 0.820 | 2 | 5.3<br>4 | 95.3  | 1.52 |
|                               | 10  | 0.01 | 0.10 | 3.000 | 0.200 | 0.800 | 2 | 5.2<br>9 | 133.7 | 2.14 |
| O                             | 15  | 0.01 | 0.15 | 3.000 | 0.300 | 0.700 | 2 | 5.3<br>7 | 98.5  | 1.58 |
| Cl <sup>-</sup>               | 10  | 0.01 | 0.10 | 3.000 | 0.100 | 0.900 | 4 | 5.4<br>1 | 130.1 | 2.08 |
|                               | 50  | 0.01 | 0.50 | 3.000 | 0.500 | 0.500 | 4 | 5.4      | 149.4 | 2.39 |
|                               | 100 | 0.01 | 1.00 | 3.000 | 1.000 | 0.000 | 4 | 5.4<br>8 | 177.2 | 2.84 |
| ClO <sub>4</sub> <sup>-</sup> | 25  | 0.01 | 0.25 | 3.000 | 0.250 | 0.750 | 4 | 5.3<br>8 | 107.9 | 1.73 |
|                               | 50  | 0.01 | 0.50 | 3.000 | 0.500 | 0.500 | 4 | 5.4<br>4 | 130.7 | 2.09 |
|                               | 75  | 0.01 | 0.75 | 3.000 | 0.750 | 0.250 | 4 | 5.5<br>4 | 141   | 2.26 |
|                               | 100 | 0.01 | 1.00 | 3.000 | 1.000 | 0.000 | 4 | 5.6<br>2 | 158   | 2.53 |

**Table S9.** Continued

|                  | Equivalent<br>s | Eu(CF <sub>3</sub> SO <sub>3</sub> ) <sub>3</sub><br>(M) | L<br>Sample<br>(M) | Eu <sup>3+</sup><br>Stock <sup>a</sup><br>(mL) | L<br>Stock<br>(mL) | Water<br>(mL) | L<br>Stock <sup>b</sup><br>(M) | pH   | Conductivity | Ionic<br>Strength <sup>c</sup><br>x10 <sup>6</sup> |
|------------------|-----------------|----------------------------------------------------------|--------------------|------------------------------------------------|--------------------|---------------|--------------------------------|------|--------------|----------------------------------------------------|
| OTf <sup>-</sup> | 25              | 0.01                                                     | 0.25               | 3.000                                          | 0.250              | 0.750         | 4                              | 5.48 | 153.8        | 2.46                                               |
|                  | 50              | 0.01                                                     | 0.50               | 3.000                                          | 0.500              | 0.500         | 4                              | 5.62 | 155.7        | 2.49                                               |
|                  | 75              | 0.01                                                     | 0.75               | 3.000                                          | 0.750              | 0.250         | 4                              | 5.69 | -            | -                                                  |
|                  | 100             | 0.01                                                     | 1.00               | 3.000                                          | 1.000              | 0.000         | 4                              | 5.76 | 155.7        | 2.49                                               |

<sup>a</sup>Eu<sup>3+</sup> Stock is 0.0132 M Eu(CF<sub>3</sub>SO<sub>3</sub>)<sub>3</sub>, 0.00132 M NaCl/KCl (see experimental section) and 0.0264 M MES.

<sup>b</sup>Details on Ligand Stock preparation can be found in the experimental section. <sup>c</sup>calculated using the Russell-prefactor of 1.6x10<sup>-5</sup> from ref<sup>1</sup>

1. Ponnampereuma, F. N.; Tianco, E. M.; Loy, T. A., IONIC STRENGTHS OF THE SOLUTIONS OF FLOODED SOILS AND OTHER NATURAL AQUEOUS SOLUTIONS FROM SPECIFIC CONDUCTANCE. *Soil science* **1966**, *102* (6), 408-413.
